# Supplementary material for: Infection with a Virulent Strain of Wolbachia Disrupts Genome Wide-Patterns of Cytosine Methylation in the Mosquito Aedes aegypti
Source: PubMed Central journal article supplement (PMC3686743; doi:10.1371/journal.pone.0066482), 2013-06-19

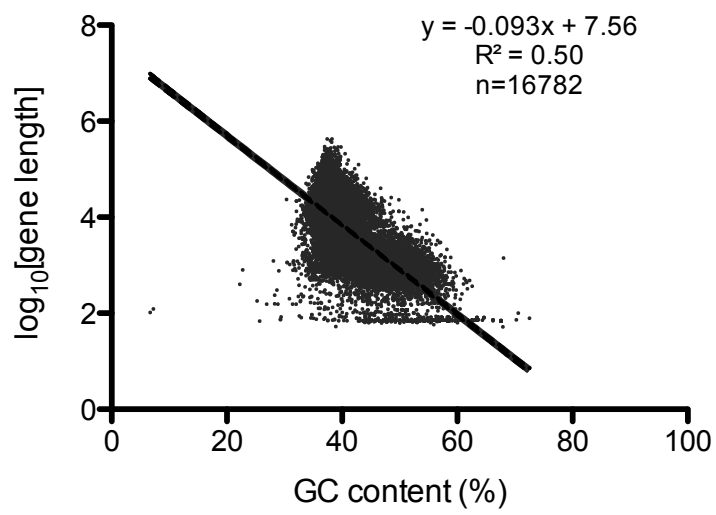

Supplement: pone.0066482.s002.pdf [file pone.0066482.s002.pdf]
