# Supplementary material for: Infection with a Virulent Strain of Wolbachia Disrupts Genome Wide-Patterns of Cytosine Methylation in the Mosquito Aedes aegypti
Source: PLoS One. 2013 Jun 19;8(6):e66482. doi: 10.1371/journal.pone.0066482 (PMC3686743; doi:10.1371/journal.pone.0066482)
Supplement: Table S3 — A. aegypti genes that are demethylated in the presence of wMelPop. (XLSX) [file pone.0066482.s005.xlsx]

## Sheet: Sheet1
Table S3. Demethylated A. aegypti genes in the presence of wMelPop
A. aegypti Gene ID	A. aegypti description	D. melanogaster homolog Gene ID	D. melanogaster_biological process	D. melanogaster_cellular component	D. melanogaster_molecular function
AAEL000015	PHD finger transcription factor [Source:VB External Description;Acc:AAEL000015]	FBgn0051151	-	-	DNA binding ; GO:0003677 | inferred from electronic annotation with InterPro:IPR001025
AAEL000054	mixed-lineage leukemia protein, mll [Source:VB External Description;Acc:AAEL000054]	FBgn0003862	germ cell migration ; GO:0008354 | inferred from mutant phenotype <newline> germ cell migration ; GO:0008354 | traceable author statement <newline> chromatin-mediated maintenance of transcription ; GO:0048096 | non-traceable author statement <newline> histone methylation ; GO:0016571 | inferred from direct assay <newline> histone methylation ; GO:0016571 | traceable author statement <newline> his…	nucleus ; GO:0005634 | non-traceable author statement <newline> histone methyltransferase complex ; GO:0035097 | inferred from direct assay <newline> nucleus ; GO:0005634 | inferred from direct assay <newline> microtubule associated complex ; GO:0005875 | inferred from direct assay <newline> polytene chromosome ; GO:0005700 | inferred from direct assay	DNA binding ; GO:0003677 | non-traceable author statement <newline> histone methyltransferase activity (H3-K4 specific) ; GO:0042800 | traceable author statement <newline> sequence-specific DNA binding ; GO:0043565 | inferred from direct assay <newline> zinc ion binding ; GO:0008270 | inferred from electronic annotation with InterPro:IPR001628, InterPro:IPR001841, InterPro:IPR001965, InterPro:IPR…
AAEL000092	glutathionetransferase [Source:VB External Description;Acc:AAEL000092]	no homolog
AAEL000099	Clip-domain serine protease, family B. [Source:VB External Description;Acc:AAEL000099]	no homolog
AAEL000102	conserved hypothetical protein [Source:VB External Description;Acc:AAEL000102]	FBgn0037819	-	-	-
AAEL000167	hypothetical protein [Source:VB External Description;Acc:AAEL000167]	no homolog
AAEL000233	membrane-associated guanylate kinase, putative [Source:VB External Description;Acc:AAEL000233]	no homolog
AAEL000263	Zinc finger protein jing homolog [Source:VB External Description;Acc:AAEL000263]	FBgn0086655	specification of segmental identity, maxillary segment ; GO:0007382 | inferred from expression pattern AND inferred from genetic interaction with Dfd <newline> border follicle cell migration ; GO:0007298 | inferred from mutant phenotype <newline> central nervous system development ; GO:0007417 | inferred from mutant phenotype <newline> open tracheal system development ; GO:0007424 | inferred from…	nucleus ; GO:0005634 | non-traceable author statement <newline> nucleus ; GO:0005634 | inferred from direct assay AND inferred from sequence or structural similarity with ci AND inferred from sequence or structural similarity with MGD:Aebp2; MGI:MGI:1338038	sequence-specific DNA binding transcription factor activity ; GO:0003700 | non-traceable author statement <newline> zinc ion binding ; GO:0008270 | inferred from electronic annotation with InterPro:IPR007087, InterPro:IPR015880 <newline> nucleic acid binding ; GO:0003676 | inferred from electronic annotation with InterPro:IPR013087
AAEL000267	conserved hypothetical protein [Source:VB External Description;Acc:AAEL000267]	no homolog
AAEL000268	lipase [Source:VB External Description;Acc:AAEL000268]	FBgn0034166	lipid metabolic process ; GO:0006629 | inferred from electronic annotation with InterPro:IPR000734	-	lipase activity ; GO:0016298 | inferred from sequence or structural similarity with EMBL:AF061274; protein_id:AAC15774.1
AAEL000294	conserved hypothetical protein [Source:VB External Description;Acc:AAEL000294]	no homolog
AAEL000295	hypothetical protein [Source:VB External Description;Acc:AAEL000295]	FBgn0034987	neurogenesis ; GO:0022008 | inferred from mutant phenotype	-	-
AAEL000324	tyrosine-protein kinase drl [Source:VB External Description;Acc:AAEL000324]	FBgn0024245	axon guidance ; GO:0007411 | inferred from mutant phenotype <newline> muscle attachment ; GO:0016203 | inferred from mutant phenotype <newline> protein phosphorylation ; GO:0006468 | inferred from sequence or structural similarity with UniProtKB:P34925 <newline> signal transduction ; GO:0007165 | inferred from mutant phenotype <newline> protein phosphorylation ; GO:0006468 | non-traceable author …	integral to membrane ; GO:0016021 | inferred from sequence or structural similarity with UniProtKB:P34925 <newline> plasma membrane ; GO:0005886 | inferred from sequence or structural similarity	transmembrane receptor protein tyrosine kinase activity ; GO:0004714 | inferred from genetic interaction with drl AND inferred from sequence or structural similarity with UniProtKB:P34925 <newline> protein tyrosine kinase activity ; GO:0004713 | non-traceable author statement <newline> ATP binding ; GO:0005524 | inferred from electronic annotation with InterPro:IPR000719
AAEL000337	hypothetical protein [Source:VB External Description;Acc:AAEL000337]	no homolog
AAEL000360	DNAJ homolog subfamily B member, putative [Source:VB External Description;Acc:AAEL000360]	FBgn0035273	response to heat ; GO:0009408 | inferred from sequence or structural similarity with EMBL:AF088983 <newline> protein folding ; GO:0006457 | inferred from electronic annotation with InterPro:IPR002939, InterPro:IPR003095, InterPro:IPR008971	-	unfolded protein binding ; GO:0051082 | inferred from electronic annotation with InterPro:IPR002939, InterPro:IPR003095, InterPro:IPR008971 <newline> heat shock protein binding ; GO:0031072 | inferred from electronic annotation with InterPro:IPR001623, InterPro:IPR003095
AAEL000425	conserved hypothetical protein [Source:VB External Description;Acc:AAEL000425]	FBgn0027914	DNA catabolic process, endonucleolytic ; GO:0000737 | inferred from direct assay <newline> DNA catabolic process, exonucleolytic ; GO:0000738 | inferred from direct assay <newline> base-excision repair ; GO:0006284 | inferred from sequence or structural similarity with UniProtKB:P14629	nucleus ; GO:0005634 | inferred from sequence or structural similarity with SGD_LOCUS:RAD27; SGD:S0001596 <newline> nucleus ; GO:0005634 | inferred from direct assay	endonuclease activity ; GO:0004519 | inferred from sequence or structural similarity <newline> 5'-3' exodeoxyribonuclease activity ; GO:0035312 | inferred from direct assay <newline> double-stranded DNA specific 3'-5' exodeoxyribonuclease activity ; GO:0008311 | inferred from direct assay <newline> endodeoxyribonuclease activity ; GO:0004520 | inferred from direct assay <newline> single-stranded …
AAEL000441	hypothetical protein [Source:VB External Description;Acc:AAEL000441]	FBgn0037260	-	-	-
AAEL000446	tight junction protein [Source:VB External Description;Acc:AAEL000446]	FBgn0003177
AAEL000455	conserved hypothetical protein [Source:VB External Description;Acc:AAEL000455]	FBgn0052544	biological_process ; GO:0008150 | no biological data available	cellular_component ; GO:0005575 | no biological data available	molecular_function ; GO:0003674 | no biological data available
AAEL000466	voltage and ligand gated potassium channel [Source:VB External Description;Acc:AAEL000466]	FBgn0000535	flight behavior ; GO:0007629 | inferred from mutant phenotype <newline> potassium ion transport ; GO:0006813 | traceable author statement <newline> courtship behavior ; GO:0007619 | traceable author statement <newline> behavioral response to ether ; GO:0048150 | non-traceable author statement <newline> courtship behavior ; GO:0007619 | non-traceable author statement <newline> learning or memory ;…	voltage-gated potassium channel complex ; GO:0008076 | inferred from sequence or structural similarity with EMBL:Z34264; protein_id:CAA84018 <newline> integral to plasma membrane ; GO:0005887 | non-traceable author statement <newline> voltage-gated potassium channel complex ; GO:0008076 | traceable author statement <newline> plasma membrane ; GO:0005886 | inferred from direct assay	voltage-gated potassium channel activity ; GO:0005249 | traceable author statement <newline> voltage-gated cation channel activity ; GO:0022843 | inferred from direct assay <newline> two-component sensor activity ; GO:0000155 | inferred from electronic annotation with InterPro:IPR000700 <newline> voltage-gated potassium channel activity ; GO:0005249 | inferred from electronic annotation with Inte…
AAEL000473	hypothetical protein [Source:VB External Description;Acc:AAEL000473]	no homolog
AAEL000486	chaperonin [Source:VB External Description;Acc:AAEL000486]	FBgn0037632	protein folding ; GO:0006457 | inferred from sequence or structural similarity with UniProtKB:Q99832 <newline> mitotic spindle organization ; GO:0007052 | inferred from mutant phenotype <newline> cytoplasmic microtubule organization ; GO:0031122 | inferred from mutant phenotype <newline> neurogenesis ; GO:0022008 | inferred from mutant phenotype	chaperonin-containing T-complex ; GO:0005832 | inferred from sequence or structural similarity with UniProtKB:Q99832 <newline> microtubule associated complex ; GO:0005875 | inferred from direct assay	ATPase activity, coupled ; GO:0042623 | inferred from sequence or structural similarity with UniProtKB:Q99832 <newline> ATP binding ; GO:0005524 | inferred from electronic annotation with InterPro:IPR002194, InterPro:IPR002423, InterPro:IPR012720 <newline> unfolded protein binding ; GO:0051082 | inferred from electronic annotation with InterPro:IPR002194, InterPro:IPR012720
AAEL000487	hypothetical protein [Source:VB External Description;Acc:AAEL000487]	FBgn0038564	-	-	-
AAEL000502	NADPH FAD oxidoreductase [Source:VB External Description;Acc:AAEL000502]	FBgn0038429	oxidation-reduction process ; GO:0055114 | inferred from electronic annotation with InterPro:IPR001433, InterPro:IPR001709, InterPro:IPR003097, InterPro:IPR017927, InterPro:IPR017938, InterPro:IPR023173	-	[methionine synthase] reductase activity ; GO:0030586 | inferred from sequence or structural similarity with NCBI_gi:13325068 AND inferred from sequence or structural similarity with NCBI_gi:4505279
AAEL000542	conserved hypothetical protein [Source:VB External Description;Acc:AAEL000542]	FBgn0039177	carotenoid biosynthetic process ; GO:0016117 | inferred from electronic annotation with InterPro:IPR008671	-	oxidoreductase activity, acting on paired donors, with incorporation or reduction of molecular oxygen ; GO:0016705 | inferred from electronic annotation with InterPro:IPR008671
AAEL000569	omega-crystallin, putative [Source:VB External Description;Acc:AAEL000569]	FBgn0086757	centrosome cycle ; GO:0007098 | inferred from mutant phenotype <newline> protein targeting to Golgi ; GO:0000042 | inferred from electronic annotation with InterPro:IPR000237	chromatin ; GO:0000785 | inferred from direct assay <newline> cytoplasm ; GO:0005737 | inferred from direct assay <newline> spindle ; GO:0005819 | inferred from direct assay <newline> perinuclear region of cytoplasm ; GO:0048471 | inferred from direct assay <newline> centrosome ; GO:0005813 | non-traceable author statement	-
AAEL000577	DNA binding protein elf-1 [Source:VB External Description;Acc:AAEL000577]	FBgn0004586
AAEL000595	beat protein [Source:VB External Description;Acc:AAEL000595]	FBgn0039089	-	extracellular region ; GO:0005576 | non-traceable author statement	-
AAEL000597	cadherin [Source:VB External Description;Acc:AAEL000597]	FBgn0015609	calcium-dependent cell-cell adhesion ; GO:0016339 | inferred from physical interaction with Î±-Cat AND inferred from physical interaction with arm AND inferred from sequence or structural similarity with shg AND inferred from sequence or structural similarity with MGD:Cdh2; MGI:MGI:88355 <newline> homophilic cell adhesion ; GO:0007156 | inferred from direct assay <newline> calcium-dependent cell-…	integral to membrane ; GO:0016021 | inferred from sequence or structural similarity with MGD:Cdh2; MGI:MGI:88355 <newline> cell-cell junction ; GO:0005911 | inferred from direct assay <newline> plasma membrane ; GO:0005886 | inferred from sequence or structural similarity with shg <newline> integral to plasma membrane ; GO:0005887 | inferred from sequence or structural similarity <newline> plasma…	cell adhesion molecule binding ; GO:0050839 | inferred from sequence or structural similarity <newline> receptor activity ; GO:0004872 | inferred from sequence or structural similarity <newline> beta-catenin binding ; GO:0008013 | non-traceable author statement <newline> calcium ion binding ; GO:0005509 | inferred from electronic annotation with InterPro:IPR001881, InterPro:IPR002126, InterPro:IP…
AAEL000613	odorant receptor [Source:VB External Description;Acc:AAEL000613]	no homolog
AAEL000656	pangolin [Source:VB External Description;Acc:AAEL000656]	FBgn0085432	embryonic pattern specification ; GO:0009880 | inferred from mutant phenotype <newline> imaginal disc-derived wing morphogenesis ; GO:0007476 | inferred from mutant phenotype <newline> regulation of transcription, DNA-dependent ; GO:0006355 | inferred from sequence or structural similarity with MGD:Tcf7l2; MGI:MGI:1202879 <newline> segment polarity determination ; GO:0007367 | non-traceable autho…	transcription factor complex ; GO:0005667 | inferred from sequence or structural similarity with MGD:Tcf7l2; MGI:MGI:1202879 <newline> microtubule associated complex ; GO:0005875 | inferred from direct assay <newline> transcription factor complex ; GO:0005667 | inferred from physical interaction with Coop	sequence-specific DNA binding ; GO:0043565 | inferred from direct assay <newline> kinase binding ; GO:0019900 | inferred from physical interaction with hipk <newline> repressing transcription factor binding ; GO:0070491 | inferred from physical interaction with Coop
AAEL000663	conserved hypothetical protein [Source:VB External Description;Acc:AAEL000663]	FBgn0036502	-	-	-
AAEL000675	hypothetical protein [Source:VB External Description;Acc:AAEL000675]	no homolog
AAEL000683	conserved hypothetical protein [Source:VB External Description;Acc:AAEL000683]	FBgn0032856	-	-	-
AAEL000688	hyperpolarization activated cyclic nucleotide-gated potassium channel [Source:VB External Description;Acc:AAEL000688]	no homolog
AAEL000742	conserved hypothetical protein [Source:VB External Description;Acc:AAEL000742]	FBgn0001253	imaginal disc eversion ; GO:0007561 | traceable author statement	extrinsic to membrane ; GO:0019898 | traceable author statement	molecular_function ; GO:0003674 | no biological data available
AAEL000747	conserved hypothetical protein [Source:VB External Description;Acc:AAEL000747]	FBgn0028383
AAEL000764	hypothetical protein [Source:VB External Description;Acc:AAEL000764]	no homolog
AAEL000817	rhomboid [Source:VB External Description;Acc:AAEL000817]	FBgn0041723	signal transduction ; GO:0007165 | inferred from sequence or structural similarity with EMBL:BC023469 <newline> proteolysis ; GO:0006508 | inferred from electronic annotation with InterPro:IPR002610	integral to membrane ; GO:0016021 | inferred from sequence or structural similarity with EMBL:BC023469	serine-type endopeptidase activity ; GO:0004252 | inferred from electronic annotation with InterPro:IPR002610, InterPro:IPR022764
AAEL000839	O-fucosyltransferase, putative [Source:VB External Description;Acc:AAEL000839]	FBgn0033901	negative regulation of Notch signaling pathway ; GO:0045746 | inferred from mutant phenotype <newline> endocytosis ; GO:0006897 | inferred from mutant phenotype <newline> protein catabolic process ; GO:0030163 | inferred from mutant phenotype <newline> lateral inhibition ; GO:0046331 | inferred from mutant phenotype <newline> protein O-linked glycosylation ; GO:0006493 | inferred from sequence or…	cytoplasmic vesicle ; GO:0031410 | inferred from direct assay <newline> integral to Golgi membrane ; GO:0030173 | inferred from sequence or structural similarity <newline> Golgi apparatus ; GO:0005794 | NOT inferred from direct assay <newline> endoplasmic reticulum ; GO:0005783 | inferred from direct assay	Notch binding ; GO:0005112 | inferred from direct assay <newline> fucosyltransferase activity ; GO:0008417 | inferred from sequence or structural similarity with UniProtKB:Q9H488 <newline> fucosyltransferase activity ; GO:0008417 | inferred from sequence or structural similarity <newline> fucosyltransferase activity ; GO:0008417 | inferred from direct assay <newline> fucosyltransferase activity ;…
AAEL000851	conserved hypothetical protein [Source:VB External Description;Acc:AAEL000851]	no homolog
AAEL000874	Apaf-1 Related Killer [Source:VB External Description;Acc:AAEL000874]	no homolog
AAEL000906	guanyl-nucleotide exchange factor [Source:VB External Description;Acc:AAEL000906]	FBgn0026179	central nervous system development ; GO:0007417 | inferred from mutant phenotype <newline> myoblast fusion ; GO:0007520 | inferred from mutant phenotype <newline> myoblast fusion ; GO:0007520 | non-traceable author statement <newline> inter-male aggressive behavior ; GO:0002121 | inferred from mutant phenotype <newline> actin cytoskeleton organization ; GO:0030036 | inferred from mutant phenotype…	intracellular ; GO:0005622 | inferred from electronic annotation with InterPro:IPR000904	guanyl-nucleotide exchange factor activity ; GO:0005085 | inferred from sequence or structural similarity with UniProtKB:Q9LZX8 <newline> guanyl-nucleotide exchange factor activity ; GO:0005085 | non-traceable author statement <newline> ARF guanyl-nucleotide exchange factor activity ; GO:0005086 | inferred from electronic annotation with InterPro:IPR000904
AAEL000919	hypothetical protein [Source:VB External Description;Acc:AAEL000919]	no homolog
AAEL000925	leucine-zipper-like transcriptional regulator 1 (LZTR-1) [Source:VB External Description;Acc:AAEL000925]	FBgn0040344	-	nucleus ; GO:0005634 | inferred from sequence or structural similarity with EMBL:U53925	sequence-specific DNA binding transcription factor activity ; GO:0003700 | inferred from sequence or structural similarity with EMBL:U53925
AAEL000927	hypothetical protein [Source:VB External Description;Acc:AAEL000927]	no homolog
AAEL000952	conserved hypothetical protein [Source:VB External Description;Acc:AAEL000952]	FBgn0029999	-	-	binding ; GO:0005488 | inferred from electronic annotation with InterPro:IPR011989, InterPro:IPR016024
AAEL001035	anterior fat body protein [Source:VB External Description;Acc:AAEL001035]	FBgn0038257	-	-	-
AAEL001037	ribosomal RNA methyltransferase [Source:VB External Description;Acc:AAEL001037]	FBgn0030720	rRNA processing ; GO:0006364 | inferred from sequence or structural similarity with UniProtKB:O42832 <newline> RNA methylation ; GO:0001510 | inferred from electronic annotation with InterPro:IPR015507	nucleolus ; GO:0005730 | inferred from sequence or structural similarity with UniProtKB:O42832	rRNA methyltransferase activity ; GO:0008649 | inferred from sequence or structural similarity with UniProtKB:O42832 <newline> nucleic acid binding ; GO:0003676 | inferred from electronic annotation with InterPro:IPR002877
AAEL001068	myosin light chain 2V, putative [Source:VB External Description;Acc:AAEL001068]	FBgn0053098	-	myosin II complex ; GO:0016460 | inferred from sequence or structural similarity with EMBL:AF513721; protein_id:AAM47603.1	calcium ion binding ; GO:0005509 | inferred from electronic annotation with InterPro:IPR011992
AAEL001093	PHD finger protein [Source:VB External Description;Acc:AAEL001093]	FBgn0031091	-	-	zinc ion binding ; GO:0008270 | inferred from electronic annotation with InterPro:IPR001841
AAEL001101	ATP-dependent transporter [Source:VB External Description;Acc:AAEL001101]	FBgn0030321	-	ATP-binding cassette (ABC) transporter complex ; GO:0043190 | inferred from sequence or structural similarity with EMBL:AF027302	ATPase activity, coupled to transmembrane movement of substances ; GO:0042626 | inferred from sequence or structural similarity with EMBL:AF027302 <newline> transporter activity ; GO:0005215 | inferred from sequence or structural similarity with EMBL:AF027302 <newline> ATP binding ; GO:0005524 | inferred from electronic annotation with InterPro:IPR003439, InterPro:IPR017871
AAEL001114	amino acid transporter [Source:VB External Description;Acc:AAEL001114]	FBgn0050394	amino acid transmembrane transport ; GO:0003333 | inferred from sequence or structural similarity with Eaat1	-	amino acid transmembrane transporter activity ; GO:0015171 | inferred from sequence or structural similarity with Eaat1
AAEL001120	conserved hypothetical protein [Source:VB External Description;Acc:AAEL001120]	no homolog
AAEL001131	splicing factor, putative [Source:VB External Description;Acc:AAEL001131]	no homolog
AAEL001169	Ribosome biogenesis protein BOP1 homolog [Source:VB External Description;Acc:AAEL001169]	FBgn0028744	ribosome biogenesis ; GO:0042254 | inferred from sequence or structural similarity with MGD:Bop1; MGI:MGI:1334460 <newline> neurogenesis ; GO:0022008 | inferred from mutant phenotype <newline> rRNA processing ; GO:0006364 | inferred from electronic annotation with InterPro:IPR012953	nucleolus ; GO:0005730 | inferred from sequence or structural similarity with MGD:Bop1; MGI:MGI:1334460	ribonucleoprotein binding ; GO:0043021 | inferred from sequence or structural similarity with MGD:Bop1; MGI:MGI:1334460
AAEL001191	conserved hypothetical protein [Source:VB External Description;Acc:AAEL001191]	no homolog
AAEL001273	Sec24B protein, putative [Source:VB External Description;Acc:AAEL001273]	FBgn0033460	ER to Golgi vesicle-mediated transport ; GO:0006888 | inferred from sequence or structural similarity with EMBL:AJ131245; protein_id:CAA10335 <newline> intracellular protein transport ; GO:0006886 | inferred from electronic annotation with InterPro:IPR006895, InterPro:IPR006896, InterPro:IPR006900	ER to Golgi transport vesicle ; GO:0030134 | inferred from sequence or structural similarity with EMBL:AJ131245; protein_id:CAA10335 <newline> COPII vesicle coat ; GO:0030127 | inferred from electronic annotation with InterPro:IPR006895, InterPro:IPR006896, InterPro:IPR006900	zinc ion binding ; GO:0008270 | inferred from electronic annotation with InterPro:IPR006895
AAEL001275	ef-hand protein nucb1 [Source:VB External Description;Acc:AAEL001275]	FBgn0052190	-	Golgi apparatus ; GO:0005794 | inferred from sequence or structural similarity with UniProtKB:Q9NJB0	DNA binding ; GO:0003677 | inferred from sequence or structural similarity with UniProtKB:Q9JI85 <newline> calcium ion binding ; GO:0005509 | inferred from sequence or structural similarity with MGD:Nucb2; MGI:MGI:1858179
AAEL001284	hypothetical protein [Source:VB External Description;Acc:AAEL001284]	no homolog
AAEL001289	permease, putative [Source:VB External Description;Acc:AAEL001289]	no homolog
AAEL001316	conserved hypothetical protein [Source:VB External Description;Acc:AAEL001316]	no homolog
AAEL001349	zinc finger protein [Source:VB External Description;Acc:AAEL001349]	FBgn0037275	-	intracellular ; GO:0005622 | inferred from electronic annotation with InterPro:IPR007087, InterPro:IPR015880	zinc ion binding ; GO:0008270 | inferred from electronic annotation with InterPro:IPR007087, InterPro:IPR015880 <newline> nucleic acid binding ; GO:0003676 | inferred from electronic annotation with InterPro:IPR013087
AAEL001352	scaffold attachment factor b [Source:VB External Description;Acc:AAEL001352]	FBgn0039229	regulation of alternative nuclear mRNA splicing, via spliceosome ; GO:0000381 | inferred from mutant phenotype	nucleus ; GO:0005634 | inferred by curator from GO:0000381 <newline> nucleoplasm ; GO:0005654 | inferred from direct assay <newline> nuclear matrix ; GO:0016363 | inferred from direct assay	mRNA binding ; GO:0003729 | inferred from sequence or structural similarity <newline> nucleic acid binding ; GO:0003676 | inferred from electronic annotation with InterPro:IPR000504, InterPro:IPR003034 <newline> nucleotide binding ; GO:0000166 | inferred from electronic annotation with InterPro:IPR012677
AAEL001361	brahma associated protein 170kD, putative [Source:VB External Description;Acc:AAEL001361]	FBgn0042085	positive regulation of transcription, DNA-dependent ; GO:0045893 | inferred from direct assay <newline> phagocytosis, engulfment ; GO:0006911 | inferred from mutant phenotype <newline> protein stabilization ; GO:0050821 | inferred from mutant phenotype <newline> imaginal disc-derived wing margin morphogenesis ; GO:0008587 | inferred from mutant phenotype <newline> imaginal disc-derived wing vein …	brahma complex ; GO:0035060 | inferred from direct assay <newline> polytene chromosome ; GO:0005700 | inferred from direct assay	transcription coactivator activity ; GO:0003713 | contributes_to inferred by curator from GO:0035060 <newline> protein binding ; GO:0005515 | inferred from physical interaction with z <newline> DNA binding ; GO:0003677 | inferred from electronic annotation with InterPro:IPR001606 <newline> zinc ion binding ; GO:0008270 | inferred from electronic annotation with InterPro:IPR015880
AAEL001368	kek1 [Source:VB External Description;Acc:AAEL001368]	FBgn0015399	negative regulation of epidermal growth factor receptor signaling pathway ; GO:0042059 | inferred from genetic interaction with Egfr AND inferred from genetic interaction with grk AND inferred from mutant phenotype <newline> negative regulation of epidermal growth factor receptor signaling pathway ; GO:0042059 | traceable author statement <newline> negative regulation of epidermal growth factor r…	plasma membrane ; GO:0005886 | inferred from sequence or structural similarity <newline> integral to membrane ; GO:0016021 | traceable author statement	epidermal growth factor binding ; GO:0048408 | inferred from physical interaction with Egfr
AAEL001375	Y-box binding protein [Source:VB External Description;Acc:AAEL001375]	FBgn0022959	oogenesis ; GO:0048477 | non-traceable author statement <newline> nuclear mRNA splicing, via spliceosome ; GO:0000398 | inferred by curator from GO:0071011|GO:0071013 <newline> regulation of transcription, DNA-dependent ; GO:0006355 | inferred from electronic annotation with InterPro:IPR002059	nucleus ; GO:0005634 | inferred from sequence or structural similarity with EMBL:L35549 <newline> precatalytic spliceosome ; GO:0071011 | inferred from direct assay <newline> catalytic step 2 spliceosome ; GO:0071013 | inferred from direct assay	nucleic acid binding ; GO:0003676 | inferred from sequence or structural similarity with EMBL:M80257; protein_id:AAA49924 AND inferred from sequence or structural similarity with NCBI_NP:003642 <newline> mRNA binding ; GO:0003729 | traceable author statement <newline> DNA binding ; GO:0003677 | inferred from electronic annotation with InterPro:IPR002059
AAEL001398	guanine nucleotide exchange factor [Source:VB External Description;Acc:AAEL001398]	FBgn0027593
AAEL001400	DNA-directed RNA polymerases III 12.5 kDa polypeptide, putative [Source:VB External Description;Acc:AAEL001400]	FBgn0061362	regulation of transcription from RNA polymerase III promoter ; GO:0006359 | inferred from sequence or structural similarity with UniProtKB:Q9Y2Y1	DNA-directed RNA polymerase III complex ; GO:0005666 | inferred from sequence or structural similarity with UniProtKB:Q9Y2Y1	DNA-directed RNA polymerase activity ; GO:0003899 | inferred from sequence or structural similarity with UniProtKB:Q9Y2Y1
AAEL001404	conserved hypothetical protein [Source:VB External Description;Acc:AAEL001404]	no homolog
AAEL001410	snf2 histone linker phd ring helicase [Source:VB External Description;Acc:AAEL001410]	FBgn0035689	neurogenesis ; GO:0022008 | inferred from mutant phenotype	-	ATP binding ; GO:0005524 | inferred from electronic annotation with InterPro:IPR000330, InterPro:IPR001650 <newline> DNA binding ; GO:0003677 | inferred from electronic annotation with InterPro:IPR000330 <newline> zinc ion binding ; GO:0008270 | inferred from electronic annotation with InterPro:IPR001841, InterPro:IPR001965 <newline> helicase activity ; GO:0004386 | inferred from electronic annot…
AAEL001412	conserved hypothetical protein [Source:VB External Description;Acc:AAEL001412]	FBgn0061361	translation ; GO:0006412 | inferred from sequence or structural similarity with EMBL:AE010357; protein_id:AAM01850.1 <newline> transcription, DNA-dependent ; GO:0006351 | inferred from electronic annotation with InterPro:IPR001222, InterPro:IPR001529, InterPro:IPR012164	-	translation regulator activity ; GO:0045182 | inferred from sequence or structural similarity with EMBL:AE010357; protein_id:AAM01850.1 <newline> DNA binding ; GO:0003677 | inferred from electronic annotation with InterPro:IPR001529 <newline> zinc ion binding ; GO:0008270 | inferred from electronic annotation with InterPro:IPR001222, InterPro:IPR012164 <newline> DNA-directed RNA polymerase activi…
AAEL001414	conserved hypothetical protein [Source:VB External Description;Acc:AAEL001414]	no homolog
AAEL001451	DNA repair protein Rad62, putative [Source:VB External Description;Acc:AAEL001451]	FBgn0032251	-	-	-
AAEL001457	guanylatte cyclase alpha 1 subunit [Source:VB External Description;Acc:AAEL001457]	FBgn0013972	positive phototaxis ; GO:0046956 | inferred from mutant phenotype <newline> rhodopsin mediated phototransduction ; GO:0009586 | inferred from mutant phenotype <newline> cGMP biosynthetic process ; GO:0006182 | inferred from electronic annotation with InterPro:IPR011645 <newline> intracellular signal transduction ; GO:0035556 | inferred from electronic annotation with InterPro:IPR001054, InterPro:…	guanylate cyclase complex, soluble ; GO:0008074 | inferred from direct assay <newline> guanylate cyclase complex, soluble ; GO:0008074 | non-traceable author statement <newline> cytoplasm ; GO:0005737 | non-traceable author statement	guanylate cyclase activity ; GO:0004383 | inferred from direct assay <newline> guanylate cyclase activity ; GO:0004383 | non-traceable author statement <newline> heme binding ; GO:0020037 | inferred from electronic annotation with InterPro:IPR011644
AAEL001459	deltex [Source:VB External Description;Acc:AAEL001459]	FBgn0000524	Notch signaling pathway ; GO:0007219 | inferred from genetic interaction with N <newline> Notch signaling pathway ; GO:0007219 | inferred from physical interaction with N <newline> negative regulation of Notch signaling pathway ; GO:0045746 | inferred from direct assay <newline> positive regulation of Notch signaling pathway ; GO:0045747 | inferred from direct assay <newline> Wnt receptor signali…	cytoplasm ; GO:0005737 | inferred from direct assay	protein binding ; GO:0005515 | inferred from physical interaction with N <newline> Notch binding ; GO:0005112 | traceable author statement <newline> zinc ion binding ; GO:0008270 | inferred from electronic annotation with InterPro:IPR001841, InterPro:IPR018123
AAEL001466	conserved hypothetical protein [Source:VB External Description;Acc:AAEL001466]	FBgn0086221
AAEL001469	kek1 [Source:VB External Description;Acc:AAEL001469]	FBgn0039862	lateral inhibition ; GO:0046331 | inferred from mutant phenotype	-	-
AAEL001471	hypothetical protein [Source:VB External Description;Acc:AAEL001471]	FBgn0003231	viral infectious cycle ; GO:0019058 | non-traceable author statement	nucleus ; GO:0005634 | non-traceable author statement	zinc ion binding ; GO:0008270 | inferred from electronic annotation with InterPro:IPR000433
AAEL001474	conserved hypothetical protein [Source:VB External Description;Acc:AAEL001474]	FBgn0063368	-	extracellular region ; GO:0005576 | inferred from electronic annotation with InterPro:IPR001545	hormone activity ; GO:0005179 | non-traceable author statement <newline> hormone activity ; GO:0005179 | contributes_to inferred from direct assay <newline> protein heterodimerization activity ; GO:0046982 | inferred from direct assay
AAEL001516	vesicle associated protein, putative [Source:VB External Description;Acc:AAEL001516]	FBgn0033339	RNA splicing ; GO:0008380 | inferred from electronic annotation with InterPro:IPR004098	ER to Golgi transport vesicle ; GO:0030134 | traceable author statement <newline> Golgi stack ; GO:0005795 | inferred from direct assay <newline> endoplasmic reticulum ; GO:0005783 | inferred from direct assay <newline> synaptic vesicle ; GO:0008021 | inferred from sequence or structural similarity with EMBL:AF034582 <newline> spliceosomal complex ; GO:0005681 | inferred from electronic annotatio…	-
AAEL001566	bone morphogenetic protein [Source:VB External Description;Acc:AAEL001566]	FBgn0004885	imaginal disc-derived wing vein morphogenesis ; GO:0008586 | inferred from mutant phenotype <newline> protein maturation by peptide bond cleavage ; GO:0051605 | inferred from direct assay <newline> axon guidance ; GO:0007411 | inferred from mutant phenotype <newline> motor axon guidance ; GO:0008045 | inferred from mutant phenotype <newline> defasciculation of motor neuron axon ; GO:0007415 | inf…	-	metalloendopeptidase activity ; GO:0004222 | inferred from sequence or structural similarity with UniProtKB:P13497 <newline> zinc ion binding ; GO:0008270 | inferred from electronic annotation with InterPro:IPR006026 <newline> calcium ion binding ; GO:0005509 | inferred from electronic annotation with InterPro:IPR001881, InterPro:IPR018097
AAEL001594	conserved hypothetical protein [Source:VB External Description;Acc:AAEL001594]	FBgn0030005	-	intracellular ; GO:0005622 | inferred from electronic annotation with InterPro:IPR007087, InterPro:IPR015880	zinc ion binding ; GO:0008270 | inferred from electronic annotation with InterPro:IPR007087, InterPro:IPR015880 <newline> nucleic acid binding ; GO:0003676 | inferred from electronic annotation with InterPro:IPR013087
AAEL001602	conserved hypothetical protein [Source:VB External Description;Acc:AAEL001602]	FBgn0034128	-	-	-
AAEL001664	hypothetical protein [Source:VB External Description;Acc:AAEL001664]	no homolog
AAEL001671	hypothetical protein [Source:VB External Description;Acc:AAEL001671]	FBgn0086673	biological_process ; GO:0008150 | no biological data available	cellular_component ; GO:0005575 | no biological data available	molecular_function ; GO:0003674 | no biological data available
AAEL001823	hypothetical protein [Source:VB External Description;Acc:AAEL001823]	FBgn0005696	DNA-dependent DNA replication ; GO:0006261 | inferred from sequence or structural similarity <newline> DNA replication ; GO:0006260 | inferred from electronic annotation with InterPro:IPR007185	alpha DNA polymerase:primase complex ; GO:0005658 | inferred from sequence or structural similarity <newline> alpha DNA polymerase:primase complex ; GO:0005658 | inferred from sequence or structural similarity with UniProtKB:Q14181	DNA-directed DNA polymerase activity ; GO:0003887 | inferred from sequence or structural similarity <newline> DNA-directed DNA polymerase activity ; GO:0003887 | inferred from sequence or structural similarity with UniProtKB:Q14181 <newline> DNA binding ; GO:0003677 | inferred from electronic annotation with InterPro:IPR007185
AAEL001838	conserved hypothetical protein [Source:VB External Description;Acc:AAEL001838]	FBgn0031776	protein folding ; GO:0006457 | inferred from electronic annotation with InterPro:IPR002777	prefoldin complex ; GO:0016272 | inferred from electronic annotation with InterPro:IPR002777	unfolded protein binding ; GO:0051082 | inferred from electronic annotation with InterPro:IPR002777
AAEL001841	conserved hypothetical protein [Source:VB External Description;Acc:AAEL001841]	no homolog
AAEL001852	conserved hypothetical protein [Source:VB External Description;Acc:AAEL001852]	FBgn0058042	-	-	-
AAEL001871	conserved hypothetical protein [Source:VB External Description;Acc:AAEL001871]	FBgn0031777	methylation ; GO:0032259 | inferred from electronic annotation with InterPro:IPR002052	cellular_component ; GO:0005575 | no biological data available	methyltransferase activity ; GO:0008168 | inferred from electronic annotation with InterPro:IPR002052 <newline> nucleic acid binding ; GO:0003676 | inferred from electronic annotation with InterPro:IPR002052
AAEL001879	conserved hypothetical protein [Source:VB External Description;Acc:AAEL001879]	FBgn0033627	-	-	DNA binding ; GO:0003677 | inferred from electronic annotation with InterPro:IPR004210
AAEL001914	scavenger receptor, putative [Source:VB External Description;Acc:AAEL001914]	FBgn0031571	-	membrane ; GO:0016020 | inferred from electronic annotation with InterPro:IPR001190, InterPro:IPR017448	scavenger receptor activity ; GO:0005044 | inferred from electronic annotation with InterPro:IPR001190, InterPro:IPR017448 <newline> binding ; GO:0005488 | inferred from electronic annotation with InterPro:IPR001304, InterPro:IPR016186, InterPro:IPR016187
AAEL001918	hypothetical protein [Source:VB External Description;Acc:AAEL001918]	FBgn0000719	terminal region determination ; GO:0007362 | inferred from genetic interaction with tor <newline> torso signaling pathway ; GO:0008293 | inferred from genetic interaction with tor <newline> posterior midgut invagination ; GO:0007374 | inferred from mutant phenotype <newline> regulation of development, heterochronic ; GO:0040034 | inferred from mutant phenotype <newline> ventral furrow formation ;…	extracellular region ; GO:0005576 | inferred from sequence or structural similarity <newline> extracellular region ; GO:0005576 | non-traceable author statement	-
AAEL001921	hypothetical protein [Source:VB External Description;Acc:AAEL001921]	FBgn0035376
AAEL001932	IMDpathway signalling, Fas-Associated Death Domain (FADD). [Source:VB External Description;Acc:AAEL001932]	FBgn0038928	defense response ; GO:0006952 | non-traceable author statement <newline> signal transduction ; GO:0007165 | non-traceable author statement <newline> immune response ; GO:0006955 | inferred from mutant phenotype <newline> apoptosis ; GO:0006915 | non-traceable author statement <newline> sperm individualization ; GO:0007291 | inferred from mutant phenotype <newline> defense response to Gram-negativ…	cytoplasm ; GO:0005737 | inferred from direct assay	death receptor binding ; GO:0005123 | non-traceable author statement <newline> protein binding ; GO:0005515 | inferred from physical interaction with Myd88 <newline> protein binding ; GO:0005515 | inferred from physical interaction with UniProtKB:Q8IRY7 <newline> protein binding ; GO:0005515 | inferred from physical interaction with UniProtKB:Q9NHG0 <newline> CARD domain binding ; GO:0050700 | in…
AAEL001933	membrane associated ring finger 1,8 [Source:VB External Description;Acc:AAEL001933]	FBgn0035983	wing disc development ; GO:0035220 | inferred from genetic interaction with Bx <newline> bristle development ; GO:0022416 | inferred from genetic interaction with Chi	-	zinc ion binding ; GO:0008270 | inferred from electronic annotation with InterPro:IPR011016
AAEL001937	selenium-binding protein [Source:VB External Description;Acc:AAEL001937]	FBgn0038115	-	-	selenium binding ; GO:0008430 | inferred from sequence or structural similarity with MGD:Selenbp1; MGI:MGI:96825
AAEL001990	hypothetical protein [Source:VB External Description;Acc:AAEL001990]	no homolog
AAEL002032	hypothetical protein [Source:VB External Description;Acc:AAEL002032]	no homolog
AAEL002075	conserved hypothetical protein [Source:VB External Description;Acc:AAEL002075]	no homolog
AAEL002082	latent nuclear antigen, putative [Source:VB External Description;Acc:AAEL002082]	FBgn0027574	biological_process ; GO:0008150 | no biological data available	cellular_component ; GO:0005575 | no biological data available	molecular_function ; GO:0003674 | no biological data available
AAEL002083	DEAD box ATP-dependent RNA helicase [Source:VB External Description;Acc:AAEL002083]	FBgn0035720	-	microtubule associated complex ; GO:0005875 | inferred from direct assay	RNA helicase activity ; GO:0003724 | inferred from sequence or structural similarity with SGD_LOCUS:DBP2; SGD:S0005056 <newline> RNA helicase activity ; GO:0003724 | inferred from sequence or structural similarity with UniProtKB:P24782 <newline> ATP-dependent helicase activity ; GO:0008026 | inferred from electronic annotation with InterPro:IPR000629, InterPro:IPR011545 <newline> ATP binding ; GO…
AAEL002084	suppressor of defective silencing [Source:VB External Description;Acc:AAEL002084]	FBgn0031036	-	Sin3-type complex ; GO:0070822 | inferred from direct assay	-
AAEL002122	conserved hypothetical protein [Source:VB External Description;Acc:AAEL002122]	FBgn0035507
AAEL002151	conserved hypothetical protein [Source:VB External Description;Acc:AAEL002151]	no homolog
AAEL002168	conserved hypothetical protein [Source:VB External Description;Acc:AAEL002168]	FBgn0038108	-	-	DNA binding ; GO:0003677 | inferred from electronic annotation with InterPro:IPR001005
AAEL002169	conserved hypothetical protein [Source:VB External Description;Acc:AAEL002169]	no homolog
AAEL002174	dolichyl-diphosphooligosaccharide protein glycosyltransferase [Source:VB External Description;Acc:AAEL002174]	FBgn0014868	protein N-linked glycosylation ; GO:0006487 | non-traceable author statement <newline> Golgi organization ; GO:0007030 | inferred from mutant phenotype <newline> lipid particle organization ; GO:0034389 | inferred from mutant phenotype <newline> neurogenesis ; GO:0022008 | inferred from mutant phenotype <newline> protein N-linked glycosylation via asparagine ; GO:0018279 | inferred from electroni…	lipid particle ; GO:0005811 | inferred from direct assay <newline> endoplasmic reticulum membrane ; GO:0005789 | inferred from electronic annotation with InterPro:IPR005013	dolichyl-diphosphooligosaccharide-protein glycotransferase activity ; GO:0004579 | inferred from sequence or structural similarity with NCBI_gi:627424
AAEL002278	guanylate cyclase, putative [Source:VB External Description;Acc:AAEL002278]	FBgn0037028	actin filament organization ; GO:0007015 | inferred from mutant phenotype <newline> cell adhesion ; GO:0007155 | inferred from mutant phenotype <newline> regulation of cell shape ; GO:0008360 | inferred from mutant phenotype	-	guanylate cyclase activity ; GO:0004383 | non-traceable author statement
AAEL002294	sulphate transporter [Source:VB External Description;Acc:AAEL002294]	no homolog
AAEL002299	high affinity copper transporter, putative [Source:VB External Description;Acc:AAEL002299]	no homolog
AAEL002300	conserved hypothetical protein [Source:VB External Description;Acc:AAEL002300]	no homolog
AAEL002306	hect E3 ubiquitin ligase [Source:VB External Description;Acc:AAEL002306]	FBgn0031107	protein ubiquitination ; GO:0016567 | inferred from electronic annotation with InterPro:IPR010606	intracellular ; GO:0005622 | inferred from electronic annotation with InterPro:IPR000569	guanyl-nucleotide exchange factor activity ; GO:0005085 | non-traceable author statement <newline> ubiquitin-protein ligase activity ; GO:0004842 | non-traceable author statement <newline> ubiquitin-protein ligase activity ; GO:0004842 | inferred from electronic annotation with InterPro:IPR010606 <newline> heme binding ; GO:0020037 | inferred from electronic annotation with InterPro:IPR001199
AAEL002317	Insulin-like receptor Precursor (MIR)(EC 2.7.10.1) [Contains Insulin-like receptor alpha chain;Insulin-like receptor beta chain] [Source:VB External Description;Acc:AAEL002317]	FBgn0013984	embryonic development via the syncytial blastoderm ; GO:0001700 | inferred from expression pattern <newline> insulin receptor signaling pathway ; GO:0008286 | inferred from sequence or structural similarity <newline> insulin receptor signaling pathway ; GO:0008286 | inferred from direct assay <newline> imaginal disc growth ; GO:0007446 | inferred from mutant phenotype <newline> regulation of mult…	insulin receptor complex ; GO:0005899 | inferred from direct assay <newline> plasma membrane ; GO:0005886 | inferred from sequence or structural similarity <newline> cell-cell junction ; GO:0005911 | inferred from direct assay <newline> plasma membrane ; GO:0005886 | inferred from sequence or structural similarity with HGNC_gene:IGF1R; HGNC:5465; OMIM:147370 AND inferred from sequence or structur…	insulin receptor activity ; GO:0005009 | inferred from direct assay <newline> insulin receptor activity ; GO:0005009 | inferred from direct assay AND inferred from sequence or structural similarity <newline> ATP binding ; GO:0005524 | inferred by curator from GO:0004713 <newline> protein tyrosine kinase activity ; GO:0004713 | non-traceable author statement <newline> insulin receptor activity ; G…
AAEL002392	conserved hypothetical protein [Source:VB External Description;Acc:AAEL002392]	FBgn0035237	-	-	-
AAEL002413	sphingomyelin phosphodiesterase [Source:VB External Description;Acc:AAEL002413]	FBgn0039769	sphingomyelin metabolic process ; GO:0006684 | inferred from sequence or structural similarity with UniProtKB:P17405 <newline> sphingomyelin catabolic process ; GO:0006685 | inferred from electronic annotation with InterPro:IPR011160	-	sphingomyelin phosphodiesterase activity ; GO:0004767 | inferred from sequence or structural similarity with UniProtKB:P17405
AAEL002453	conserved hypothetical protein [Source:VB External Description;Acc:AAEL002453]	no homolog
AAEL002454	conserved hypothetical protein [Source:VB External Description;Acc:AAEL002454]	no homolog
AAEL002465	conserved hypothetical protein [Source:VB External Description;Acc:AAEL002465]	FBgn0034346	metabolic process ; GO:0008152 | inferred from electronic annotation with InterPro:IPR017849, InterPro:IPR017850	-	catalytic activity ; GO:0003824 | inferred from electronic annotation with InterPro:IPR002591, InterPro:IPR017849, InterPro:IPR017850
AAEL002488	DEAD box ATP-dependent RNA helicase [Source:VB External Description;Acc:AAEL002488]	FBgn0015075	embryonic development via the syncytial blastoderm ; GO:0001700 | inferred from expression pattern <newline> regulation of translational initiation ; GO:0006446 | inferred from sequence or structural similarity with UniProtKB:Q92499 <newline> spliceosome assembly ; GO:0000245 | inferred from sequence or structural similarity with UniProtKB:Q92499 <newline> ribosome biogenesis ; GO:0042254 | infer…	cellular_component ; GO:0005575 | no biological data available	ATP-dependent helicase activity ; GO:0008026 | inferred from sequence or structural similarity with UniProtKB:Q92499 <newline> helicase activity ; GO:0004386 | inferred from sequence or structural similarity <newline> ATP binding ; GO:0005524 | inferred from electronic annotation with InterPro:IPR001650, InterPro:IPR011545 <newline> nucleic acid binding ; GO:0003676 | inferred from electronic ann…
AAEL002506	glutamate receptor, ionotropic kainate 1, 2, 3 (glur5, glur6, glur7) [Source:VB External Description;Acc:AAEL002506]	FBgn0026255	ion transport ; GO:0006811 | inferred from electronic annotation with InterPro:IPR001508	membrane ; GO:0016020 | inferred from electronic annotation with InterPro:IPR001320, InterPro:IPR001508, InterPro:IPR019594 <newline> outer membrane-bounded periplasmic space ; GO:0030288 | inferred from electronic annotation with InterPro:IPR001638	kainate selective glutamate receptor activity ; GO:0015277 | inferred from sequence or structural similarity <newline> ionotropic glutamate receptor activity ; GO:0004970 | inferred from electronic annotation with InterPro:IPR001320, InterPro:IPR019594 <newline> extracellular-glutamate-gated ion channel activity ; GO:0005234 | inferred from electronic annotation with InterPro:IPR001320, InterPro:…
AAEL002519	serine collagenase 1 precursor, putative [Source:VB External Description;Acc:AAEL002519]	no homolog
AAEL002522	adenosine deaminase acting on RNA (adar)-2 [Source:VB External Description;Acc:AAEL002522]	FBgn0026086	response to hypoxia ; GO:0001666 | traceable author statement <newline> adenosine to inosine editing ; GO:0006382 | inferred from mutant phenotype <newline> adult behavior ; GO:0030534 | inferred from mutant phenotype <newline> adult locomotory behavior ; GO:0008344 | inferred from mutant phenotype <newline> regulation of membrane potential ; GO:0042391 | inferred from mutant phenotype <newline> …	intracellular ; GO:0005622 | inferred from electronic annotation with InterPro:IPR001159, InterPro:IPR014720	double-stranded RNA adenosine deaminase activity ; GO:0003726 | inferred from direct assay <newline> double-stranded RNA binding ; GO:0003725 | inferred from sequence or structural similarity <newline> double-stranded RNA binding ; GO:0003725 | inferred from electronic annotation with InterPro:IPR001159
AAEL002531	conserved hypothetical protein [Source:VB External Description;Acc:AAEL002531]	no homolog
AAEL002548	conserved hypothetical protein [Source:VB External Description;Acc:AAEL002548]	FBgn0026317	cellular response to hypoxia ; GO:0071456 | inferred from mutant phenotype <newline> negative regulation of cell growth ; GO:0030308 | inferred from genetic interaction with gig AND inferred from mutant phenotype <newline> negative regulation of cell proliferation ; GO:0008285 | inferred from genetic interaction with gig <newline> negative regulation of organ growth ; GO:0046621 | inferred from m…	cytoplasm ; GO:0005737 | inferred from direct assay	kinase binding ; GO:0019900 | inferred from physical interaction with Tor
AAEL002569	serine/threonine kinase [Source:VB External Description;Acc:AAEL002569]	FBgn0004461
AAEL002594	P21-activated kinase, pak [Source:VB External Description;Acc:AAEL002594]	FBgn0014001	cell adhesion ; GO:0007155 | inferred from direct assay <newline> axon guidance ; GO:0007411 | inferred from mutant phenotype AND inferred from physical interaction with dock <newline> JNK cascade ; GO:0007254 | non-traceable author statement <newline> dorsal closure ; GO:0007391 | traceable author statement <newline> axon guidance ; GO:0007411 | traceable author statement <newline> axon guidance…	focal adhesion ; GO:0005925 | inferred from direct assay <newline> cytoskeleton ; GO:0005856 | inferred from mutant phenotype <newline> lateral plasma membrane ; GO:0016328 | inferred from direct assay	protein serine/threonine kinase activity ; GO:0004674 | inferred from sequence or structural similarity <newline> protein serine/threonine kinase activity ; GO:0004674 | non-traceable author statement <newline> protein serine/threonine kinase activity ; GO:0004674 | inferred from direct assay <newline> receptor signaling protein serine/threonine kinase activity ; GO:0004702 | non-traceable author…
AAEL002628	hypothetical protein [Source:VB External Description;Acc:AAEL002628]	no homolog
AAEL002640	discoidin domain receptor [Source:VB External Description;Acc:AAEL002640]	FBgn0053531	protein phosphorylation ; GO:0006468 | non-traceable author statement <newline> transmembrane receptor protein tyrosine kinase signaling pathway ; GO:0007169 | inferred from sequence or structural similarity with HGNC_gene:DDR2; HGNC:2731; OMIM:191311	integral to membrane ; GO:0016021 | inferred from sequence or structural similarity with HGNC_gene:DDR2; HGNC:2731; OMIM:191311	protein tyrosine kinase activity ; GO:0004713 | non-traceable author statement <newline> transmembrane receptor protein tyrosine kinase activity ; GO:0004714 | inferred from sequence or structural similarity with HGNC_gene:DDR2; HGNC:2731; OMIM:191311
AAEL002718	chitin synthase [Source:VB External Description;Acc:AAEL002718]	FBgn0001311	regulation of tube diameter, open tracheal system ; GO:0035158 | inferred from mutant phenotype <newline> regulation of tube length, open tracheal system ; GO:0035159 | inferred from mutant phenotype <newline> chitin-based embryonic cuticle biosynthetic process ; GO:0008362 | inferred from mutant phenotype <newline> cuticle chitin biosynthetic process ; GO:0006035 | inferred from mutant phenotype…	integral to membrane ; GO:0016021 | inferred from sequence or structural similarity	chitin synthase activity ; GO:0004100 | non-traceable author statement <newline> chitin synthase activity ; GO:0004100 | inferred from sequence or structural similarity with SGD_LOCUS:CHS1; SGD:S0005136 AND inferred from sequence or structural similarity with SGD_LOCUS:CHS2; SGD:S0000242 AND inferred from sequence or structural similarity with SGD_LOCUS:CHS3; SGD:S0000227
AAEL002776	conserved hypothetical protein [Source:VB External Description;Acc:AAEL002776]	FBgn0020439	biological_process ; GO:0008150 | no biological data available	cellular_component ; GO:0005575 | no biological data available	molecular_function ; GO:0003674 | no biological data available
AAEL002799	hypothetical protein [Source:VB External Description;Acc:AAEL002799]	no homolog
AAEL002851	tubulin beta chain [Source:VB External Description;Acc:AAEL002851]	FBgn0003887	microtubule-based process ; GO:0007017 | inferred from sequence or structural similarity with UniProtKB:P05218 <newline> muscle attachment ; GO:0016203 | traceable author statement <newline> microtubule-based movement ; GO:0007018 | inferred from electronic annotation with InterPro:IPR002453 <newline> protein polymerization ; GO:0051258 | inferred from electronic annotation with InterPro:IPR00300…	tubulin complex ; GO:0045298 | inferred from sequence or structural similarity with UniProtKB:P05218 <newline> microtubule ; GO:0005874 | inferred from sequence or structural similarity <newline> microtubule ; GO:0005874 | non-traceable author statement <newline> microtubule ; GO:0005874 | inferred from direct assay	GTP binding ; GO:0005525 | inferred from sequence or structural similarity with UniProtKB:P05218 <newline> structural constituent of cytoskeleton ; GO:0005200 | inferred by curator from GO:0045298 <newline> structural constituent of cytoskeleton ; GO:0005200 | inferred from sequence or structural similarity <newline> structural molecule activity ; GO:0005198 | inferred from electronic annotation …
AAEL002866	cyclin l [Source:VB External Description;Acc:AAEL002866]	FBgn0040394	neurogenesis ; GO:0022008 | inferred from mutant phenotype <newline> regulation of transcription, DNA-dependent ; GO:0006355 | inferred from electronic annotation with InterPro:IPR015429 <newline> regulation of cyclin-dependent protein kinase activity ; GO:0000079 | inferred from electronic annotation with InterPro:IPR015429 <newline> RNA processing ; GO:0006396 | inferred from electronic annotat…	nucleus ; GO:0005634 | inferred from sequence or structural similarity with EMBL:AF159159; protein_id:AAD43568.1	cyclin-dependent protein kinase regulator activity ; GO:0016538 | inferred from sequence or structural similarity with EMBL:AF159159; protein_id:AAD43568.1 <newline> protein kinase binding ; GO:0019901 | inferred from electronic annotation with InterPro:IPR015429, InterPro:IPR015431, InterPro:IPR017060
AAEL002874	apolipoprotein a binding protein [Source:VB External Description;Acc:AAEL002874]	FBgn0030178	biological_process ; GO:0008150 | no biological data available	cellular_component ; GO:0005575 | no biological data available	molecular_function ; GO:0003674 | no biological data available
AAEL002879	heterogeneous nuclear ribonucleoprotein r [Source:VB External Description;Acc:AAEL002879]	FBgn0038826	nuclear mRNA splicing, via spliceosome ; GO:0000398 | inferred by curator from GO:0071011 <newline> neurogenesis ; GO:0022008 | inferred from mutant phenotype	heterogeneous nuclear ribonucleoprotein complex ; GO:0030530 | inferred from sequence or structural similarity with NCBI_gi:5031755 <newline> precatalytic spliceosome ; GO:0071011 | inferred from direct assay	mRNA binding ; GO:0003729 | inferred from sequence or structural similarity <newline> nucleic acid binding ; GO:0003676 | inferred from electronic annotation with InterPro:IPR000504 <newline> nucleotide binding ; GO:0000166 | inferred from electronic annotation with InterPro:IPR012677
AAEL002881	NADH:ubiquinone dehydrogenase, putative [Source:VB External Description;Acc:AAEL002881]	FBgn0052230	mitochondrial electron transport, NADH to ubiquinone ; GO:0006120 | inferred from sequence or structural similarity with UniProtKB:O00483	mitochondrial respiratory chain complex I ; GO:0005747 | inferred from sequence or structural similarity with UniProtKB:O00483	NADH dehydrogenase activity ; GO:0003954 | inferred from sequence or structural similarity with UniProtKB:O00483
AAEL002896	conserved hypothetical protein [Source:VB External Description;Acc:AAEL002896]	FBgn0030219
AAEL002920	hypothetical protein [Source:VB External Description;Acc:AAEL002920]	no homolog
AAEL002937	hypothetical protein [Source:VB External Description;Acc:AAEL002937]	FBgn0030331	transmembrane transport ; GO:0055085 | inferred from electronic annotation with InterPro:IPR011701	integral to membrane ; GO:0016021 | inferred from electronic annotation with InterPro:IPR011701	secondary active organic cation transmembrane transporter activity ; GO:0008513 | inferred from sequence or structural similarity with EMBL:AJ006036; protein_id:CAA06827.1
AAEL002949	Osiris, putative [Source:VB External Description;Acc:AAEL002949]	FBgn0037424	biological_process ; GO:0008150 | no biological data available	integral to plasma membrane ; GO:0005887 | inferred from sequence model	molecular_function ; GO:0003674 | no biological data available
AAEL002972	brain chitinase and chia [Source:VB External Description;Acc:AAEL002972]	FBgn0038180	chitin catabolic process ; GO:0006032 | inferred from direct assay	extracellular space ; GO:0005615 | inferred from direct assay	chitinase activity ; GO:0004568 | inferred from sequence or structural similarity with EMBL:AF026491 <newline> chitin binding ; GO:0008061 | inferred from direct assay <newline> chitinase activity ; GO:0004568 | inferred from direct assay <newline> cation binding ; GO:0043169 | inferred from electronic annotation with InterPro:IPR013781
AAEL002983	conserved hypothetical protein [Source:VB External Description;Acc:AAEL002983]	FBgn0034504	-	-	-
AAEL002987	kinesin heavy chain [Source:VB External Description;Acc:AAEL002987]	FBgn0004387	microtubule-based movement ; GO:0007018 | inferred from sequence or structural similarity <newline> microtubule-based movement ; GO:0007018 | inferred from sequence or structural similarity with UniProtKB:O43896 <newline> cell communication ; GO:0007154 | inferred from electronic annotation with InterPro:IPR001683	kinesin complex ; GO:0005871 | inferred from sequence or structural similarity <newline> kinesin complex ; GO:0005871 | inferred from sequence or structural similarity with UniProtKB:O43896	microtubule motor activity ; GO:0003777 | inferred from sequence or structural similarity <newline> microtubule motor activity ; GO:0003777 | inferred from sequence or structural similarity with UniProtKB:O43896 <newline> ATP binding ; GO:0005524 | inferred from electronic annotation with InterPro:IPR001752, InterPro:IPR019821 <newline> phosphatidylinositol binding ; GO:0035091 | inferred from el…
AAEL003023	conserved hypothetical protein [Source:VB External Description;Acc:AAEL003023]	no homolog
AAEL003042	conserved hypothetical protein [Source:VB External Description;Acc:AAEL003042]	no homolog
AAEL003049	pupal cuticle protein 78E, putative [Source:VB External Description;Acc:AAEL003049]	FBgn0039805	-	-	structural constituent of chitin-based cuticle ; GO:0005214 | inferred from sequence or structural similarity with Pfam:PF00379 inferred from sequence or structural similarity with InterPro:IPR000618
AAEL003101	hypothetical protein [Source:VB External Description;Acc:AAEL003101]	no homolog
AAEL003109	atlastin [Source:VB External Description;Acc:AAEL003109]	FBgn0039213	membrane fusion ; GO:0061025 | inferred from direct assay <newline> regulation of synaptic growth at neuromuscular junction ; GO:0008582 | inferred from mutant phenotype <newline> neuromuscular junction development ; GO:0007528 | inferred from mutant phenotype <newline> regulation of microtubule depolymerization ; GO:0031114 | inferred from mutant phenotype <newline> endoplasmic reticulum membran…	cytoplasm ; GO:0005737 | inferred from direct assay <newline> endoplasmic reticulum ; GO:0005783 | inferred from direct assay <newline> Golgi apparatus ; GO:0005794 | inferred from direct assay <newline> intrinsic to endoplasmic reticulum membrane ; GO:0031227 | inferred from direct assay	protein homodimerization activity ; GO:0042803 | inferred from mutant phenotype <newline> GTPase activity ; GO:0003924 | inferred from mutant phenotype <newline> guanyl ribonucleotide binding ; GO:0032561 | inferred from mutant phenotype <newline> GTPase activity ; GO:0003924 | inferred from direct assay <newline> GTP binding ; GO:0005525 | inferred from electronic annotation with InterPro:IPR003…
AAEL003134	conserved hypothetical protein [Source:VB External Description;Acc:AAEL003134]	no homolog
AAEL003137	conserved hypothetical protein [Source:VB External Description;Acc:AAEL003137]	FBgn0035710	biological_process ; GO:0008150 | no biological data available	cellular_component ; GO:0005575 | no biological data available	molecular_function ; GO:0003674 | no biological data available
AAEL003145	bestrophin 2,3,4 [Source:VB External Description;Acc:AAEL003145]	FBgn0040238	chloride transport ; GO:0006821 | inferred from direct assay <newline> cell volume homeostasis ; GO:0006884 | inferred from direct assay	integral to membrane ; GO:0016021 | inferred from direct assay	chloride channel activity ; GO:0005254 | non-traceable author statement <newline> volume-sensitive chloride channel activity ; GO:0072320 | inferred from direct assay <newline> chloride channel activity ; GO:0005254 | inferred from direct assay
AAEL003146	conserved hypothetical protein [Source:VB External Description;Acc:AAEL003146]	no homolog
AAEL003155	dynein heavy chain [Source:VB External Description;Acc:AAEL003155]	FBgn0039510	microtubule-based movement ; GO:0007018 | inferred from sequence or structural similarity <newline> microtubule-based movement ; GO:0007018 | inferred from electronic annotation with InterPro:IPR004273	cytoplasmic dynein complex ; GO:0005868 | inferred from sequence or structural similarity with UniProtKB:Q19020 <newline> microtubule associated complex ; GO:0005875 | inferred from sequence or structural similarity with UniProtKB:Q19020 <newline> dynein complex ; GO:0030286 | inferred from sequence or structural similarity <newline> microtubule associated complex ; GO:0005875 | inferred from dir…	motor activity ; GO:0003774 | inferred from sequence or structural similarity with UniProtKB:Q19020 <newline> ATPase activity, coupled ; GO:0042623 | inferred from sequence or structural similarity <newline> ATP binding ; GO:0005524 | inferred from electronic annotation with InterPro:IPR011704 <newline> ATPase activity ; GO:0016887 | inferred from electronic annotation with InterPro:IPR011704 <ne…
AAEL003178	conserved hypothetical protein [Source:VB External Description;Acc:AAEL003178]	no homolog
AAEL003192	mfs transporter [Source:VB External Description;Acc:AAEL003192]	FBgn0038938	neurogenesis ; GO:0022008 | inferred from mutant phenotype <newline> transmembrane transport ; GO:0055085 | inferred from electronic annotation with InterPro:IPR005828	integral to membrane ; GO:0016021 | inferred from electronic annotation with InterPro:IPR005828	secondary active organic cation transmembrane transporter activity ; GO:0008513 | inferred from sequence or structural similarity with EMBL:AB016257; protein_id:BAA36626.1
AAEL003204	conserved hypothetical protein [Source:VB External Description;Acc:AAEL003204]	FBgn0058042	-	-	-
AAEL003205	conserved hypothetical protein [Source:VB External Description;Acc:AAEL003205]	no homolog
AAEL003252	hypothetical protein [Source:VB External Description;Acc:AAEL003252]	FBgn0085412	-	-	-
AAEL003294	fibrinogen and fibronectin [Source:VB External Description;Acc:AAEL003294]	no homolog
AAEL003362	hypothetical protein [Source:VB External Description;Acc:AAEL003362]	no homolog
AAEL003391	tankyrase [Source:VB External Description;Acc:AAEL003391]	FBgn0027508	cytoskeletal anchoring at plasma membrane ; GO:0007016 | inferred from sequence or structural similarity with EMBL:L40632 <newline> wing disc development ; GO:0035220 | inferred from genetic interaction with Bx <newline> bristle development ; GO:0022416 | inferred from genetic interaction with Ssdp inferred from genetic interaction with Chi	-	structural constituent of cytoskeleton ; GO:0005200 | inferred from sequence or structural similarity with EMBL:L40632 <newline> NAD+ ADP-ribosyltransferase activity ; GO:0003950 | inferred from electronic annotation with InterPro:IPR012317
AAEL003424	zinc carboxypeptidase [Source:VB External Description;Acc:AAEL003424]	FBgn0032144	neurogenesis ; GO:0022008 | inferred from mutant phenotype <newline> proteolysis ; GO:0006508 | inferred from electronic annotation with InterPro:IPR000834, InterPro:IPR003146	extracellular space ; GO:0005615 | inferred from sequence or structural similarity with UniProtKB:P15085	metallocarboxypeptidase activity ; GO:0004181 | inferred from sequence or structural similarity with MGD:Cpa1; MGI:MGI:88478 <newline> zinc ion binding ; GO:0008270 | inferred from electronic annotation with InterPro:IPR000834
AAEL003444	Caspase(Short). [Source:VB External Description;Acc:AAEL003444]	FBgn0028381	apoptosis ; GO:0006915 | non-traceable author statement <newline> programmed cell death ; GO:0012501 | traceable author statement <newline> apoptosis ; GO:0006915 | inferred from mutant phenotype <newline> larval midgut histolysis ; GO:0035069 | NOT inferred from mutant phenotype <newline> proteolysis ; GO:0006508 | inferred from electronic annotation with InterPro:IPR001309, InterPro:IPR002138, …	cytoplasm ; GO:0005737 | inferred from direct assay	cysteine-type endopeptidase activity ; GO:0004197 | non-traceable author statement <newline> cysteine-type endopeptidase activity ; GO:0004197 | traceable author statement <newline> cysteine-type endopeptidase activity ; GO:0004197 | inferred from direct assay inferred from sequence or structural similarity with Dcp-1
AAEL003499	calsyntenin-1 precursor [Source:VB External Description;Acc:AAEL003499]	FBgn0039928	calcium-dependent cell-cell adhesion ; GO:0016339 | inferred from sequence or structural similarity <newline> synaptic transmission ; GO:0007268 | non-traceable author statement <newline> synaptic transmission ; GO:0007268 | inferred from sequence or structural similarity with UniProtKB:Q9EPL2 <newline> homophilic cell adhesion ; GO:0007156 | inferred from electronic annotation with InterPro:IPR0…	integral to plasma membrane ; GO:0005887 | inferred from sequence or structural similarity <newline> extracellular region ; GO:0005576 | inferred from sequence or structural similarity with UniProtKB:Q9EPL2 <newline> postsynaptic membrane ; GO:0045211 | inferred from sequence or structural similarity with UniProtKB:Q9EPL2	calcium ion binding ; GO:0005509 | non-traceable author statement <newline> calcium ion binding ; GO:0005509 | inferred from sequence or structural similarity with UniProtKB:Q9EPL2
AAEL003522	protein arginine n-methyltransferase [Source:VB External Description;Acc:AAEL003522]	FBgn0032329	-	cytoplasm ; GO:0005737 | inferred from electronic annotation with InterPro:IPR007857	protein-arginine N-methyltransferase activity ; GO:0016274 | inferred from sequence or structural similarity with SGD_LOCUS:HMT1; SGD:S0000238
AAEL003529	zinc finger protein [Source:VB External Description;Acc:AAEL003529]	FBgn0034878	mitosis ; GO:0007067 | non-traceable author statement <newline> DNA endoreduplication ; GO:0042023 | inferred from mutant phenotype <newline> DNA replication ; GO:0006260 | inferred from mutant phenotype <newline> regulation of gene silencing ; GO:0060968 | inferred from mutant phenotype	nucleus ; GO:0005634 | inferred from direct assay	DNA binding ; GO:0003677 | inferred from direct assay <newline> zinc ion binding ; GO:0008270 | inferred from electronic annotation with InterPro:IPR007087, InterPro:IPR012934, InterPro:IPR015880
AAEL003542	conserved hypothetical protein [Source:VB External Description;Acc:AAEL003542]	FBgn0031875	biological_process ; GO:0008150 | no biological data available	cellular_component ; GO:0005575 | no biological data available	molecular_function ; GO:0003674 | no biological data available
AAEL003545	carboxylesterase [Source:VB External Description;Acc:AAEL003545]	FBgn0033943	-	-	carboxylesterase activity ; GO:0004091 | inferred from sequence or structural similarity with UniProtKB:O00748
AAEL003575	hypothetical protein [Source:VB External Description;Acc:AAEL003575]	FBgn0051462	-	-	-
AAEL003607	fibrinogen and fibronectin [Source:VB External Description;Acc:AAEL003607]	no homolog
AAEL003608	inositol 1,4,5-trisphosphate receptor [Source:VB External Description;Acc:AAEL003608]	FBgn0010051	flight behavior ; GO:0007629 | inferred from mutant phenotype <newline> molting cycle, chitin-based cuticle ; GO:0007591 | inferred from genetic interaction with rut <newline> response to oxidative stress ; GO:0006979 | inferred from mutant phenotype <newline> mushroom body development ; GO:0016319 | inferred from mutant phenotype <newline> nuclear division ; GO:0000280 | inferred from direct ass…	endoplasmic reticulum membrane ; GO:0005789 | non-traceable author statement <newline> endoplasmic reticulum ; GO:0005783 | inferred from direct assay <newline> membrane ; GO:0016020 | inferred from electronic annotation with InterPro:IPR000493, InterPro:IPR000699, InterPro:IPR003608, InterPro:IPR005821, InterPro:IPR016093	inositol 1,4,5-trisphosphate-sensitive calcium-release channel activity ; GO:0005220 | inferred from direct assay <newline> calcium channel activity ; GO:0005262 | non-traceable author statement <newline> inositol 1,4,5-trisphosphate-sensitive calcium-release channel activity ; GO:0005220 | non-traceable author statement <newline> inositol 1,4,5-trisphosphate-sensitive calcium-release channel act…
AAEL003650	inhibitor of growth protein, ing1 [Source:VB External Description;Acc:AAEL003650]	FBgn0038546	-	Sin3-type complex ; GO:0070822 | inferred from direct assay	zinc ion binding ; GO:0008270 | inferred from electronic annotation with InterPro:IPR001965
AAEL003688	conserved hypothetical protein [Source:VB External Description;Acc:AAEL003688]	FBgn0033638	-	-	-
AAEL003702	conserved hypothetical protein [Source:VB External Description;Acc:AAEL003702]	no homolog
AAEL003733	hypothetical protein [Source:VB External Description;Acc:AAEL003733]	FBgn0052479	ubiquitin-dependent protein catabolic process ; GO:0006511 | inferred from electronic annotation with InterPro:IPR001394, InterPro:IPR018200	-	ubiquitin thiolesterase activity ; GO:0004221 | inferred from electronic annotation with InterPro:IPR001394, InterPro:IPR018200
AAEL003748	cytochrome P450 [Source:VB External Description;Acc:AAEL003748]	no homolog
AAEL003765	calcium-activated potassium channel alpha chain [Source:VB External Description;Acc:AAEL003765]	FBgn0003429	potassium ion transport ; GO:0006813 | inferred from direct assay <newline> circadian rhythm ; GO:0007623 | inferred from mutant phenotype <newline> response to drug ; GO:0042493 | inferred from mutant phenotype <newline> potassium ion transport ; GO:0006813 | non-traceable author statement <newline> male courtship behavior, veined wing generated song production ; GO:0045433 | non-traceable autho…	plasma membrane ; GO:0005886 | non-traceable author statement <newline> neuron projection ; GO:0043005 | inferred from direct assay <newline> neuronal cell body ; GO:0043025 | inferred from direct assay <newline> membrane ; GO:0016020 | inferred from direct assay <newline> voltage-gated potassium channel complex ; GO:0008076 | inferred from electronic annotation with InterPro:IPR003091	calcium-activated potassium channel activity ; GO:0015269 | inferred from direct assay <newline> protein binding ; GO:0005515 | inferred from physical interaction with Slob <newline> protein binding ; GO:0005515 | inferred from physical interaction with Slip1 <newline> protein binding ; GO:0005515 | inferred from physical interaction with Pka-C1 <newline> calcium-activated potassium channel activ…
AAEL003789	exportin, putative [Source:VB External Description;Acc:AAEL003789]	FBgn0001337	intracellular protein transport ; GO:0006886 | inferred from electronic annotation with InterPro:IPR001494	-	protein transporter activity ; GO:0008565 | inferred from electronic annotation with InterPro:IPR001494 <newline> binding ; GO:0005488 | inferred from electronic annotation with InterPro:IPR016024
AAEL003790	conserved hypothetical protein [Source:VB External Description;Acc:AAEL003790]	FBgn0040913
AAEL003834	metalloproteinase, putative [Source:VB External Description;Acc:AAEL003834]	FBgn0039069	proteolysis ; GO:0006508 | inferred from electronic annotation with InterPro:IPR001506, InterPro:IPR006026	meprin A complex ; GO:0017090 | inferred from sequence or structural similarity with UniProtKB:P28826	metalloendopeptidase activity ; GO:0004222 | inferred from sequence or structural similarity with UniProtKB:P28826 <newline> zinc ion binding ; GO:0008270 | inferred from electronic annotation with InterPro:IPR006026
AAEL003873	glycerol-3-phosphate dehydrogenase [Source:VB External Description;Acc:AAEL003873]	FBgn0022160	glycerol metabolic process ; GO:0006071 | inferred from sequence or structural similarity with UniProtKB:P43304 <newline> glycerophosphate shuttle ; GO:0006127 | inferred from mutant phenotype <newline> flight behavior ; GO:0007629 | inferred from mutant phenotype <newline> neurogenesis ; GO:0022008 | inferred from mutant phenotype <newline> glycerol-3-phosphate metabolic process ; GO:0006072 | i…	lipid particle ; GO:0005811 | inferred from direct assay <newline> mitochondrion ; GO:0005739 | inferred from sequence or structural similarity with UniProtKB:P35571 <newline> mitochondrion ; GO:0005739 | inferred from sequence or structural similarity with UniProtKB:P43304 <newline> mitochondrion ; GO:0005739 | inferred by curator from GO:0004368|GO:0006127 <newline> mitochondrial inner membrane…	glycerol-3-phosphate dehydrogenase activity ; GO:0004368 | inferred from sequence or structural similarity with UniProtKB:P35571 <newline> glycerol-3-phosphate dehydrogenase activity ; GO:0004368 | inferred from sequence or structural similarity with UniProtKB:P43304 <newline> glycerol-3-phosphate dehydrogenase activity ; GO:0004368 | inferred from mutant phenotype <newline> calcium ion binding ;…
AAEL003878	hypothetical protein [Source:VB External Description;Acc:AAEL003878]	FBgn0030360	-	-	-
AAEL003908	nuclear pore complex protein nup107 [Source:VB External Description;Acc:AAEL003908]	FBgn0027868	SMAD protein import into nucleus ; GO:0007184 | inferred from mutant phenotype	nuclear pore ; GO:0005643 | inferred from sequence or structural similarity with UniProtKB:P52590 <newline> nuclear envelope ; GO:0005635 | inferred from direct assay	-
AAEL003926	GTP-binding protein lepa [Source:VB External Description;Acc:AAEL003926]	FBgn0024182	translation ; GO:0006412 | inferred from sequence or structural similarity with EMBL:U89415	-	GTPase activity ; GO:0003924 | inferred from sequence or structural similarity with EMBL:U89415 <newline> translation elongation factor activity ; GO:0003746 | inferred from sequence or structural similarity with EMBL:U89415 <newline> GTP binding ; GO:0005525 | inferred from electronic annotation with InterPro:IPR000640, InterPro:IPR000795, InterPro:IPR005225, InterPro:IPR006297
AAEL003936	conserved hypothetical protein [Source:VB External Description;Acc:AAEL003936]	FBgn0003065	-	-	-
AAEL003939	eukaryotic translation initiation factor 2-alpha kinase 3 (pancreatic eif2-alpha kinase) [Source:VB External Description;Acc:AAEL003939]	FBgn0037327	negative regulation of translation ; GO:0017148 | non-traceable author statement <newline> response to unfolded protein ; GO:0006986 | non-traceable author statement <newline> ER overload response ; GO:0006983 | non-traceable author statement <newline> protein phosphorylation ; GO:0006468 | non-traceable author statement <newline> regulation of translational initiation in response to stress ; GO:…	endoplasmic reticulum lumen ; GO:0005788 | non-traceable author statement <newline> endoplasmic reticulum ; GO:0005783 | non-traceable author statement	elongation factor-2 kinase activity ; GO:0004686 | non-traceable author statement <newline> protein kinase activity ; GO:0004672 | non-traceable author statement <newline> elongation factor-2 kinase activity ; GO:0004686 | inferred from direct assay <newline> elongation factor-2 kinase activity ; GO:0004686 | inferred from sequence or structural similarity with NCBI_gi:4758892 <newline> protein s…
AAEL003976	conserved hypothetical protein [Source:VB External Description;Acc:AAEL003976]	FBgn0034722	positive regulation of histone H3-K4 methylation ; GO:0051571 | inferred from mutant phenotype <newline> positive regulation of Notch signaling pathway ; GO:0045747 | inferred from genetic interaction with N <newline> positive regulation of transcription, DNA-dependent ; GO:0045893 | inferred from mutant phenotype <newline> transcription initiation, DNA-dependent ; GO:0006352 | inferred from elec…	nucleus ; GO:0005634 | inferred from direct assay <newline> transcriptionally active chromatin ; GO:0035327 | inferred from direct assay	DNA binding ; GO:0003677 | inferred from electronic annotation with InterPro:IPR004343, InterPro:IPR018144
AAEL004100	hypothetical protein [Source:VB External Description;Acc:AAEL004100]	no homolog
AAEL004124	mitochondrial glutamate carrier, putative [Source:VB External Description;Acc:AAEL004124]	FBgn0039223	transmembrane transport ; GO:0055085 | inferred from electronic annotation with InterPro:IPR002067	mitochondrial envelope ; GO:0005740 | inferred from sequence or structural similarity <newline> mitochondrial inner membrane ; GO:0005743 | inferred from electronic annotation with InterPro:IPR002067	transmembrane transporter activity ; GO:0022857 | inferred from sequence or structural similarity <newline> binding ; GO:0005488 | inferred from electronic annotation with InterPro:IPR002067
AAEL004127	acyl-coa dehydrogenase [Source:VB External Description;Acc:AAEL004127]	FBgn0038742	transcription initiation from RNA polymerase II promoter ; GO:0006367 | inferred from sequence or structural similarity <newline> dendrite morphogenesis ; GO:0048813 | inferred from mutant phenotype <newline> oxidation-reduction process ; GO:0055114 | inferred from electronic annotation with InterPro:IPR006089, InterPro:IPR006090, InterPro:IPR006091, InterPro:IPR006092, InterPro:IPR009075, InterP…	mediator complex ; GO:0016592 | inferred from sequence or structural similarity	acyl-CoA dehydrogenase activity ; GO:0003995 | inferred from sequence or structural similarity with UniProtKB:P16219 <newline> RNA polymerase II transcription cofactor activity ; GO:0001104 | inferred from sequence or structural similarity <newline> flavin adenine dinucleotide binding ; GO:0050660 | inferred from electronic annotation with InterPro:IPR013786
AAEL004130	conserved hypothetical protein [Source:VB External Description;Acc:AAEL004130]	FBgn0025776	regulation of transcription, DNA-dependent ; GO:0006355 | inferred from sequence or structural similarity with EMBL:AY436761 <newline> ventral cord development ; GO:0007419 | non-traceable author statement <newline> dorsal/ventral pattern formation ; GO:0009953 | traceable author statement <newline> neuroblast fate determination ; GO:0007400 | traceable author statement <newline> ventral cord dev…	nucleus ; GO:0005634 | inferred from sequence or structural similarity with EMBL:AY436761	sequence-specific DNA binding transcription factor activity ; GO:0003700 | inferred from sequence or structural similarity with EMBL:AY436761 <newline> transcription factor binding ; GO:0008134 | inferred from physical interaction with D <newline> sequence-specific DNA binding ; GO:0043565 | inferred from direct assay <newline> sequence-specific DNA binding transcription factor activity ; GO:0003…
AAEL004196	Galectin. [Source:VB External Description;Acc:AAEL004196]	FBgn0052226	biological_process ; GO:0008150 | no biological data available	integral to membrane ; GO:0016021 | inferred from electronic annotation with InterPro:IPR006614	sugar binding ; GO:0005529 | inferred from electronic annotation with InterPro:IPR001079
AAEL004202	hypothetical protein [Source:VB External Description;Acc:AAEL004202]	no homolog
AAEL004209	opioid-binding protein/cell adhesion molecule, putative [Source:VB External Description;Acc:AAEL004209]	FBgn0034723	-	-	-
AAEL004266	pre-mRNA cleavage factor im, 25kD subunit [Source:VB External Description;Acc:AAEL004266]	FBgn0035987	mRNA cleavage ; GO:0006379 | inferred from sequence or structural similarity with EMBL:AJ001810; protein_id:CAA05026.1 <newline> mRNA cleavage ; GO:0006379 | inferred from sequence or structural similarity with NCBI_NP:008937	mRNA cleavage factor complex ; GO:0005849 | inferred from sequence or structural similarity with EMBL:AJ001810; protein_id:CAA05026.1 <newline> mRNA cleavage factor complex ; GO:0005849 | inferred from sequence or structural similarity with NCBI_NP:008937	hydrolase activity ; GO:0016787 | inferred from electronic annotation with InterPro:IPR000086
AAEL004286	hypothetical protein [Source:VB External Description;Acc:AAEL004286]	FBgn0050149
AAEL004320	WOC protein, putative [Source:VB External Description;Acc:AAEL004320]	FBgn0010328	telomere capping ; GO:0016233 | inferred from mutant phenotype <newline> ecdysone biosynthetic process ; GO:0006697 | inferred from mutant phenotype <newline> regulation of transcription, DNA-dependent ; GO:0006355 | inferred from mutant phenotype <newline> neurogenesis ; GO:0022008 | inferred from mutant phenotype	heterochromatin ; GO:0000792 | inferred from direct assay <newline> euchromatin ; GO:0000791 | inferred from direct assay <newline> polytene chromosome interband ; GO:0005705 | inferred from direct assay <newline> polytene chromosome, telomeric region ; GO:0035012 | inferred from direct assay <newline> protein complex ; GO:0043234 | inferred from direct assay	protein binding ; GO:0005515 | inferred from physical interaction with HP1c <newline> DNA binding ; GO:0003677 | inferred from electronic annotation with InterPro:IPR017956 <newline> zinc ion binding ; GO:0008270 | inferred from electronic annotation with InterPro:IPR010507
AAEL004327	valyl-tRNA synthetase [Source:VB External Description;Acc:AAEL004327]	FBgn0027079	valyl-tRNA aminoacylation ; GO:0006438 | inferred from sequence or structural similarity with SGD_LOCUS:VAS1; SGD:S0003326 <newline> neurogenesis ; GO:0022008 | inferred from mutant phenotype	cytoplasm ; GO:0005737 | inferred from electronic annotation with InterPro:IPR001412, InterPro:IPR002300, InterPro:IPR002303, InterPro:IPR009008, InterPro:IPR009080, InterPro:IPR013155, InterPro:IPR019499	glutamate-tRNA ligase activity ; GO:0004818 | inferred from sequence or structural similarity <newline> valine-tRNA ligase activity ; GO:0004832 | inferred from sequence or structural similarity with SGD_LOCUS:VAS1; SGD:S0003326 <newline> ATP binding ; GO:0005524 | inferred from electronic annotation with InterPro:IPR001412, InterPro:IPR002300, InterPro:IPR002303, InterPro:IPR009008, InterPro:IPR…
AAEL004329	rab gdp-dissociation inhibitor [Source:VB External Description;Acc:AAEL004329]	FBgn0026378	intracellular protein transport ; GO:0006886 | inferred from sequence or structural similarity with UniProtKB:P24386 <newline> neurotransmitter secretion ; GO:0007269 | non-traceable author statement <newline> vesicle-mediated transport ; GO:0016192 | non-traceable author statement <newline> protein geranylgeranylation ; GO:0018344 | inferred from sequence or structural similarity with UniProtKB:…	Rab-protein geranylgeranyltransferase complex ; GO:0005968 | inferred from sequence or structural similarity with UniProtKB:P37727 <newline> Rab-protein geranylgeranyltransferase complex ; GO:0005968 | inferred from sequence or structural similarity with UniProtKB:P24386 <newline> aster ; GO:0005818 | inferred from direct assay <newline> cytoplasm ; GO:0005737 | inferred from sequence or structur…	Rab GTPase binding ; GO:0017137 | inferred from sequence or structural similarity with UniProtKB:P37727 <newline> Rab GTPase binding ; GO:0017137 | inferred from sequence or structural similarity with UniProtKB:P24386 <newline> Rab GTPase binding ; GO:0017137 | non-traceable author statement <newline> Rab geranylgeranyltransferase activity ; GO:0004663 | contributes_to inferred from sequence or s…
AAEL004358	conserved hypothetical protein [Source:VB External Description;Acc:AAEL004358]	FBgn0002783	chromatin remodeling ; GO:0006338 | non-traceable author statement <newline> positive regulation of transcription, DNA-dependent ; GO:0045893 | inferred from direct assay <newline> oogenesis ; GO:0048477 | non-traceable author statement <newline> imaginal disc-derived wing margin morphogenesis ; GO:0008587 | inferred from mutant phenotype <newline> imaginal disc-derived wing vein morphogenesis ; …	brahma complex ; GO:0035060 | non-traceable author statement <newline> chromatin remodeling complex ; GO:0016585 | inferred from sequence or structural similarity with EMBL:U85614 <newline> brahma complex ; GO:0035060 | inferred from direct assay <newline> brahma complex ; GO:0035060 | traceable author statement	transcription coactivator activity ; GO:0003713 | contributes_to inferred by curator from GO:0035060 <newline> protein binding ; GO:0005515 | inferred from physical interaction with Bap60 AND inferred from physical interaction with brm AND inferred from physical interaction with dalao AND inferred from physical interaction with z <newline> DNA binding ; GO:0003677 | inferred from electronic annot…
AAEL004364	conserved hypothetical protein [Source:VB External Description;Acc:AAEL004364]	FBgn0038597	neurogenesis ; GO:0022008 | inferred from mutant phenotype	-	-
AAEL004384	hypothetical protein [Source:VB External Description;Acc:AAEL004384]	no homolog
AAEL004399	GPCR Glycoprotein Hormone Family [Source:VB External Description;Acc:AAEL004399]	FBgn0016650	G-protein coupled receptor protein signaling pathway ; GO:0007186 | inferred from sequence or structural similarity <newline> G-protein coupled receptor protein signaling pathway ; GO:0007186 | inferred from electronic annotation with InterPro:IPR000276, InterPro:IPR002131	integral to membrane ; GO:0016021 | inferred from sequence or structural similarity <newline> integral to membrane ; GO:0016021 | inferred from electronic annotation with InterPro:IPR000276, InterPro:IPR002131	G-protein coupled receptor activity ; GO:0004930 | inferred from sequence or structural similarity <newline> neuropeptide receptor activity ; GO:0008188 | inferred from sequence or structural similarity <newline> protein-hormone receptor activity ; GO:0016500 | inferred from sequence or structural similarity <newline> protein-hormone receptor activity ; GO:0016500 | inferred from electronic annot…
AAEL004419	ATP-dependent RNA helicase [Source:VB External Description;Acc:AAEL004419]	FBgn0033160	nuclear mRNA splicing, via spliceosome ; GO:0000398 | inferred from sequence or structural similarity with NCBI_NP:011395 AND inferred from sequence or structural similarity with SGD_LOCUS:PRP43; SGD:S0003088 <newline> nuclear mRNA splicing, via spliceosome ; GO:0000398 | inferred by curator from GO:0071011|GO:0071013 <newline> neurogenesis ; GO:0022008 | inferred from mutant phenotype	spliceosomal complex ; GO:0005681 | inferred from sequence or structural similarity with SGD_LOCUS:PRP43; SGD:S0003088 <newline> precatalytic spliceosome ; GO:0071011 | inferred from direct assay <newline> catalytic step 2 spliceosome ; GO:0071013 | inferred from direct assay	RNA helicase activity ; GO:0003724 | inferred from sequence or structural similarity <newline> ATP-dependent RNA helicase activity ; GO:0004004 | inferred from sequence or structural similarity with SGD_LOCUS:PRP43; SGD:S0003088 <newline> ATP-dependent helicase activity ; GO:0008026 | inferred from sequence or structural similarity with EMBL:AB001636 <newline> RNA helicase activity ; GO:0003724 |…
AAEL004514	conserved hypothetical protein [Source:VB External Description;Acc:AAEL004514]	FBgn0028475	-	plasma membrane ; GO:0005886 | inferred from sequence or structural similarity with UniProtKB:Q9Z2G6	binding ; GO:0005488 | inferred from electronic annotation with InterPro:IPR011990
AAEL004545	conserved hypothetical protein [Source:VB External Description;Acc:AAEL004545]	FBgn0029685	lateral inhibition ; GO:0046331 | inferred from mutant phenotype	-	-
AAEL004648	hypothetical protein [Source:VB External Description;Acc:AAEL004648]	FBgn0010433	R8 cell fate commitment ; GO:0007460 | inferred from mutant phenotype <newline> cell fate commitment ; GO:0045165 | inferred from mutant phenotype <newline> optic lobe placode development ; GO:0001748 | inferred from mutant phenotype <newline> Bolwig's organ morphogenesis ; GO:0001746 | inferred from expression pattern <newline> compound eye morphogenesis ; GO:0001745 | traceable author statement…	nucleus ; GO:0005634 | non-traceable author statement	sequence-specific DNA binding transcription factor activity ; GO:0003700 | non-traceable author statement <newline> DNA binding ; GO:0003677 | non-traceable author statement
AAEL004658	hypothetical protein [Source:VB External Description;Acc:AAEL004658]	FBgn0050015	-	-	-
AAEL004664	conserved hypothetical protein [Source:VB External Description;Acc:AAEL004664]	FBgn0085425	potassium ion transmembrane transport ; GO:0071805 | inferred from electronic annotation with InterPro:IPR003280	membrane ; GO:0016020 | inferred from electronic annotation with InterPro:IPR003280	open rectifier potassium channel activity ; GO:0005252 | inferred from sequence or structural similarity with EMBL:AF031384
AAEL004710	spingomyelin synthetase [Source:VB External Description;Acc:AAEL004710]	no homolog
AAEL004717	cyclin-dependent kinase 5 activator [Source:VB External Description;Acc:AAEL004717]	FBgn0027491	protein phosphorylation ; GO:0006468 | inferred from sequence or structural similarity <newline> axonogenesis ; GO:0007409 | inferred from mutant phenotype inferred from genetic interaction with Cdk5 <newline> motor axon guidance ; GO:0008045 | inferred from mutant phenotype <newline> adult locomotory behavior ; GO:0008344 | inferred from mutant phenotype <newline> determination of adult lifespan…	cyclin-dependent protein kinase 5 holoenzyme complex ; GO:0016533 | inferred from physical interaction with Cdk5 <newline> axon ; GO:0030424 | inferred from direct assay <newline> neuronal cell body ; GO:0043025 | inferred from direct assay <newline> dendrite ; GO:0030425 | inferred from direct assay <newline> growth cone ; GO:0030426 | inferred from direct assay	cyclin-dependent protein kinase activity ; GO:0004693 | inferred from sequence or structural similarity <newline> cyclin-dependent protein kinase 5 activator activity ; GO:0016534 | inferred from direct assay
AAEL004724		no homolog
AAEL004745	pupal cuticle protein, putative [Source:VB External Description;Acc:AAEL004745]	FBgn0051876	neurogenesis ; GO:0022008 | inferred from mutant phenotype	-	structural constituent of pupal chitin-based cuticle ; GO:0008011 | inferred from sequence or structural similarity with UniProtKB:O61486 <newline> structural constituent of chitin-based cuticle ; GO:0005214 | inferred from sequence or structural similarity with Pfam:PF00379 inferred from sequence or structural similarity with InterPro:IPR000618
AAEL004762	pupal cuticle protein, putative [Source:VB External Description;Acc:AAEL004762]	FBgn0051876	neurogenesis ; GO:0022008 | inferred from mutant phenotype	-	structural constituent of pupal chitin-based cuticle ; GO:0008011 | inferred from sequence or structural similarity with UniProtKB:O61486 <newline> structural constituent of chitin-based cuticle ; GO:0005214 | inferred from sequence or structural similarity with Pfam:PF00379 inferred from sequence or structural similarity with InterPro:IPR000618
AAEL004792	hypothetical protein [Source:VB External Description;Acc:AAEL004792]	no homolog
AAEL004801	hypothetical protein [Source:VB External Description;Acc:AAEL004801]	no homolog
AAEL004817	conserved hypothetical protein [Source:VB External Description;Acc:AAEL004817]	FBgn0034804	-	-	-
AAEL004874	limd1 [Source:VB External Description;Acc:AAEL004874]	FBgn0030530	positive regulation of organ growth ; GO:0046622 | inferred from mutant phenotype <newline> positive regulation of imaginal disc growth ; GO:0045572 | inferred from mutant phenotype <newline> hippo signaling cascade ; GO:0035329 | inferred from mutant phenotype	adherens junction ; GO:0005912 | inferred from direct assay	ligand-dependent nuclear receptor binding ; GO:0016922 | inferred from sequence or structural similarity with EMBL:L40374 <newline> thyroid hormone receptor binding ; GO:0046966 | inferred from sequence or structural similarity with EMBL:L40374 <newline> actin binding ; GO:0003779 | inferred from sequence or structural similarity with NCBI_gi:2497678 <newline> zinc ion binding ; GO:0008270 | infe…
AAEL004942	helicase [Source:VB External Description;Acc:AAEL004942]	FBgn0000212	imaginal disc-derived wing vein specification ; GO:0007474 | inferred from mutant phenotype <newline> chromatin-mediated maintenance of transcription ; GO:0048096 | non-traceable author statement <newline> hemocyte proliferation ; GO:0035172 | traceable author statement <newline> muscle organ development ; GO:0007517 | inferred from mutant phenotype <newline> dendrite morphogenesis ; GO:0048813 |…	chromatin remodeling complex ; GO:0016585 | inferred from sequence or structural similarity with SGD_LOCUS:SNF2; SGD:S0005816 <newline> nucleus ; GO:0005634 | non-traceable author statement <newline> brahma complex ; GO:0035060 | inferred from direct assay <newline> brahma complex ; GO:0035060 | traceable author statement	DNA-dependent ATPase activity ; GO:0008094 | non-traceable author statement <newline> transcription coactivator activity ; GO:0003713 | inferred from sequence or structural similarity with SGD_LOCUS:SNF2; SGD:S0005816 <newline> transcription coactivator activity ; GO:0003713 | non-traceable author statement <newline> protein binding ; GO:0005515 | inferred from physical interaction with mor <newl…
AAEL004944	hypothetical protein [Source:VB External Description;Acc:AAEL004944]	FBgn0037109	transcription from RNA polymerase II promoter ; GO:0006366 | inferred from mutant phenotype <newline> transcription initiation from RNA polymerase II promoter ; GO:0006367 | inferred from sequence or structural similarity <newline> transcription from RNA polymerase II promoter ; GO:0006366 | inferred from sequence or structural similarity with EMBL:AF055994 <newline> regulation of transcription f…	nucleus ; GO:0005634 | inferred from sequence or structural similarity with EMBL:AF055994 <newline> mediator complex ; GO:0016592 | inferred from sequence or structural similarity <newline> mediator complex ; GO:0016592 | inferred from sequence or structural similarity with EMBL:AF055994 <newline> mediator complex ; GO:0016592 | inferred by curator from GO:0001104	RNA polymerase II transcription cofactor activity ; GO:0001104 | inferred from sequence or structural similarity <newline> RNA polymerase II transcription cofactor activity ; GO:0001104 | inferred from mutant phenotype <newline> RNA polymerase II transcription cofactor activity ; GO:0001104 | inferred from sequence or structural similarity with EMBL:AF055994
AAEL004969	conserved hypothetical protein [Source:VB External Description;Acc:AAEL004969]	FBgn0032136	lipid transport ; GO:0006869 | inferred from electronic annotation with InterPro:IPR001747, InterPro:IPR009454, InterPro:IPR011030, InterPro:IPR015255, InterPro:IPR015816, InterPro:IPR015817, InterPro:IPR015818, InterPro:IPR015819	extracellular space ; GO:0005615 | inferred from sequence or structural similarity with UniProtKB:Q25490 <newline> microtubule associated complex ; GO:0005875 | inferred from direct assay	lipid binding ; GO:0008289 | inferred from sequence or structural similarity with UniProtKB:Q25490 <newline> lipid transporter activity ; GO:0005319 | inferred from electronic annotation with InterPro:IPR001747, InterPro:IPR009454, InterPro:IPR011030, InterPro:IPR015255, InterPro:IPR015816, InterPro:IPR015817, InterPro:IPR015818, InterPro:IPR015819
AAEL004982	conserved hypothetical protein [Source:VB External Description;Acc:AAEL004982]	FBgn0028879	-	-	-
AAEL004992	lachesin, putative [Source:VB External Description;Acc:AAEL004992]	FBgn0051708	-	-	-
AAEL005022	Mediator of RNA polymerase II transcription subunit 15 (Mediator complex subunit 15) [Source:VB External Description;Acc:AAEL005022]	FBgn0027592	transcription initiation from RNA polymerase II promoter ; GO:0006367 | inferred from sequence or structural similarity <newline> regulation of transcription from RNA polymerase II promoter ; GO:0006357 | inferred from electronic annotation with InterPro:IPR019087	mediator complex ; GO:0016592 | inferred from sequence or structural similarity <newline> mediator complex ; GO:0016592 | inferred from electronic annotation with InterPro:IPR019087	RNA polymerase II transcription cofactor activity ; GO:0001104 | inferred from sequence or structural similarity <newline> RNA polymerase II transcription cofactor activity ; GO:0001104 | inferred from electronic annotation with InterPro:IPR019087
AAEL005026	ATP-dependent bile acid permease [Source:VB External Description;Acc:AAEL005026]	no homolog
AAEL005045	ATP-dependent bile acid permease [Source:VB External Description;Acc:AAEL005045]	FBgn0032456	response to methotrexate ; GO:0031427 | inferred from expression pattern <newline> transmembrane transport ; GO:0055085 | inferred from electronic annotation with InterPro:IPR001140, InterPro:IPR011527	integral to membrane ; GO:0016021 | inferred from electronic annotation with InterPro:IPR001140, InterPro:IPR005292, InterPro:IPR011527	ATPase activity, coupled to transmembrane movement of substances ; GO:0042626 | inferred from direct assay <newline> ATPase activity, coupled to movement of substances ; GO:0043492 | inferred from direct assay <newline> xenobiotic-transporting ATPase activity ; GO:0008559 | inferred from sequence or structural similarity with EMBL:AF022908 <newline> ATP binding ; GO:0005524 | inferred from electr…
AAEL005057	hypothetical protein [Source:VB External Description;Acc:AAEL005057]	no homolog
AAEL005061	sec10 [Source:VB External Description;Acc:AAEL005061]	FBgn0027103	neurotransmitter secretion ; GO:0007269 | non-traceable author statement <newline> synaptic vesicle docking involved in exocytosis ; GO:0016081 | non-traceable author statement <newline> synaptic vesicle targeting ; GO:0016080 | non-traceable author statement <newline> vesicle-mediated transport ; GO:0016192 | inferred from sequence or structural similarity <newline> vesicle-mediated transport ; …	exocyst ; GO:0000145 | non-traceable author statement <newline> exocyst ; GO:0000145 | inferred from sequence or structural similarity <newline> cytoplasm ; GO:0005737 | inferred from electronic annotation with InterPro:IPR009976	-
AAEL005099	rap GTPase-activating protein [Source:VB External Description;Acc:AAEL005099]	FBgn0030444
AAEL005130	zinc finger protein [Source:VB External Description;Acc:AAEL005130]	FBgn0033252	-	intracellular ; GO:0005622 | inferred from electronic annotation with InterPro:IPR007087, InterPro:IPR015880	zinc ion binding ; GO:0008270 | inferred from electronic annotation with InterPro:IPR007087, InterPro:IPR015880 <newline> nucleic acid binding ; GO:0003676 | inferred from electronic annotation with InterPro:IPR013087
AAEL005164	conserved hypothetical protein [Source:VB External Description;Acc:AAEL005164]	no homolog
AAEL005214	hypothetical protein [Source:VB External Description;Acc:AAEL005214]	no homolog
AAEL005231	hypothetical protein [Source:VB External Description;Acc:AAEL005231]	FBgn0052529	-	-	DNA binding ; GO:0003677 | inferred from electronic annotation with InterPro:IPR001025
AAEL005284	receptor tyrosine phosphatase type r2a [Source:VB External Description;Acc:AAEL005284]	FBgn0000464	protein dephosphorylation ; GO:0006470 | inferred from direct assay <newline> axon guidance ; GO:0007411 | inferred from mutant phenotype <newline> motor axon guidance ; GO:0008045 | inferred from mutant phenotype <newline> motor axon guidance ; GO:0008045 | traceable author statement <newline> protein dephosphorylation ; GO:0006470 | non-traceable author statement <newline> axon guidance ; GO:00…	plasma membrane ; GO:0005886 | inferred from sequence or structural similarity <newline> integral to membrane ; GO:0016021 | non-traceable author statement <newline> axon ; GO:0030424 | inferred from direct assay <newline> microtubule associated complex ; GO:0005875 | inferred from direct assay <newline> plasma membrane ; GO:0005886 | inferred from direct assay	protein tyrosine phosphatase activity ; GO:0004725 | inferred from direct assay <newline> transmembrane receptor protein tyrosine phosphatase activity ; GO:0005001 | inferred from sequence or structural similarity <newline> protein tyrosine phosphatase activity ; GO:0004725 | non-traceable author statement <newline> transmembrane receptor protein tyrosine phosphatase activity ; GO:0005001 | infer…
AAEL005302	beta-1,4-galactosyltransferase [Source:VB External Description;Acc:AAEL005302]	FBgn0027538	sperm individualization ; GO:0007291 | inferred from mutant phenotype <newline> N-acetylglucosamine metabolic process ; GO:0006044 | inferred from direct assay <newline> adult locomotory behavior ; GO:0008344 | inferred from mutant phenotype <newline> neuromuscular junction development ; GO:0007528 | inferred from mutant phenotype <newline> glycolipid biosynthetic process ; GO:0009247 | inferred …	Golgi apparatus ; GO:0005794 | inferred from direct assay	acetylgalactosaminyltransferase activity ; GO:0008376 | inferred from direct assay <newline> N-acetyl-beta-glucosaminyl-glycoprotein 4-beta-N-acetylgalactosaminyltransferase activity ; GO:0033842 | inferred from direct assay
AAEL005304	conserved hypothetical protein [Source:VB External Description;Acc:AAEL005304]	FBgn0022085
AAEL005378	set domain protein [Source:VB External Description;Acc:AAEL005378]	FBgn0034926	phagocytosis, engulfment ; GO:0006911 | inferred from mutant phenotype <newline> intracellular signal transduction ; GO:0035556 | inferred from electronic annotation with InterPro:IPR002219	-	DNA binding ; GO:0003677 | inferred from electronic annotation with InterPro:IPR000910 <newline> zinc ion binding ; GO:0008270 | inferred from electronic annotation with InterPro:IPR001841, InterPro:IPR001965
AAEL005380	mixed-lineage leukemia protein, mll [Source:VB External Description;Acc:AAEL005380]	FBgn0023518	histone methylation ; GO:0016571 | inferred from direct assay <newline> progression of morphogenetic furrow involved in compound eye morphogenesis ; GO:0007458 | inferred from genetic interaction with hh AND inferred from mutant phenotype <newline> smoothened signaling pathway ; GO:0007224 | non-traceable author statement <newline> compound eye development ; GO:0048749 | inferred from mutant phen…	nucleus ; GO:0005634 | inferred from direct assay <newline> polytene chromosome ; GO:0005700 | inferred from direct assay <newline> nucleus ; GO:0005634 | non-traceable author statement	histone methyltransferase activity (H3-K4 specific) ; GO:0042800 | inferred from direct assay <newline> receptor binding ; GO:0005102 | inferred from physical interaction with EcR AND inferred from physical interaction with usp <newline> transcription coactivator activity ; GO:0003713 | inferred from genetic interaction with EcR <newline> DNA binding ; GO:0003677 | non-traceable author statement …
AAEL005381	Dissatisfaction (Dsf) [Source:VB External Description;Acc:AAEL005381]	FBgn0015381	somatic sex determination ; GO:0018993 | non-traceable author statement <newline> courtship behavior ; GO:0007619 | non-traceable author statement <newline> sex determination ; GO:0007530 | traceable author statement <newline> mating behavior ; GO:0007617 | non-traceable author statement <newline> copulation ; GO:0007620 | non-traceable author statement <newline> oviposition ; GO:0018991 | non-tr…	nucleus ; GO:0005634 | inferred from sequence or structural similarity <newline> nucleus ; GO:0005634 | inferred from electronic annotation with InterPro:IPR000536, InterPro:IPR001628, InterPro:IPR001723, InterPro:IPR003068, InterPro:IPR008946	ligand-dependent nuclear receptor activity ; GO:0004879 | inferred from sequence or structural similarity with UniProtKB:P70052 <newline> sequence-specific DNA binding transcription factor activity ; GO:0003700 | traceable author statement <newline> ligand-dependent nuclear receptor activity ; GO:0004879 | traceable author statement <newline> ligand-dependent nuclear receptor activity ; GO:000487…
AAEL005416	oxidase/peroxidase [Source:VB External Description;Acc:AAEL005416]	FBgn0039222
AAEL005508	NADH-ubiquinone oxidoreductase 24 kda subunit [Source:VB External Description;Acc:AAEL005508]	FBgn0030853	mitochondrial electron transport, NADH to ubiquinone ; GO:0006120 | inferred from sequence or structural similarity with UniProtKB:P19404	mitochondrial respiratory chain complex I ; GO:0005747 | inferred from sequence or structural similarity with UniProtKB:P04394 <newline> mitochondrial respiratory chain complex I ; GO:0005747 | inferred from sequence or structural similarity with UniProtKB:P19404	NADH dehydrogenase (ubiquinone) activity ; GO:0008137 | inferred from sequence or structural similarity with UniProtKB:P04394 <newline> NADH dehydrogenase activity ; GO:0003954 | inferred from sequence or structural similarity with UniProtKB:P19404 <newline> NAD binding ; GO:0051287 | inferred from electronic annotation with InterPro:IPR002023
AAEL005511	hypothetical protein [Source:VB External Description;Acc:AAEL005511]	no homolog
AAEL005528	conserved hypothetical protein [Source:VB External Description;Acc:AAEL005528]	FBgn0015778	Ras protein signal transduction ; GO:0007265 | inferred from genetic interaction with Rho1 <newline> ommatidial rotation ; GO:0016318 | inferred from mutant phenotype <newline> compound eye photoreceptor fate commitment ; GO:0001752 | inferred from mutant phenotype <newline> nuclear mRNA splicing, via spliceosome ; GO:0000398 | inferred by curator from GO:0071011|GO:0071013 <newline> transport ; …	cytosol ; GO:0005829 | inferred from direct assay <newline> lipid particle ; GO:0005811 | inferred from direct assay <newline> precatalytic spliceosome ; GO:0071011 | inferred from direct assay <newline> catalytic step 2 spliceosome ; GO:0071013 | inferred from direct assay	mRNA binding ; GO:0003729 | inferred from sequence or structural similarity <newline> SH3 domain binding ; GO:0017124 | inferred from sequence or structural similarity with EMBL:U65313 <newline> nucleic acid binding ; GO:0003676 | inferred from electronic annotation with InterPro:IPR000504 <newline> nucleotide binding ; GO:0000166 | inferred from electronic annotation with InterPro:IPR012677
AAEL005532	RHO kinase, putative [Source:VB External Description;Acc:AAEL005532]	FBgn0026181	protein phosphorylation ; GO:0006468 | inferred from sequence or structural similarity <newline> Rho protein signal transduction ; GO:0007266 | inferred from physical interaction with Rho1 <newline> protein phosphorylation ; GO:0006468 | non-traceable author statement <newline> dorsal closure ; GO:0007391 | traceable author statement <newline> ommatidial rotation ; GO:0016318 | non-traceable auth…	-	protein serine/threonine kinase activity ; GO:0004674 | inferred from sequence or structural similarity <newline> protein binding ; GO:0005515 | inferred from physical interaction with Rho1 <newline> protein serine/threonine kinase activity ; GO:0004674 | inferred from direct assay AND inferred from sequence or structural similarity <newline> protein serine/threonine kinase activity ; GO:0004674 …
AAEL005544	YTH domain protein [Source:VB External Description;Acc:AAEL005544]	FBgn0039261	-	-	-
AAEL005619	defective proboscis extension response, putative [Source:VB External Description;Acc:AAEL005619]	FBgn0053481	biological_process ; GO:0008150 | no biological data available	cellular_component ; GO:0005575 | no biological data available	molecular_function ; GO:0003674 | no biological data available
AAEL005622	conserved hypothetical protein [Source:VB External Description;Acc:AAEL005622]	FBgn0052036	chitin metabolic process ; GO:0006030 | inferred from electronic annotation with InterPro:IPR002557	extracellular region ; GO:0005576 | inferred from electronic annotation with InterPro:IPR002557	chitin binding ; GO:0008061 | inferred from sequence or structural similarity with EMBL:AJ439060; protein_id:CAD27768
AAEL005628	conserved hypothetical protein [Source:VB External Description;Acc:AAEL005628]	FBgn0030177	neurogenesis ; GO:0022008 | inferred from mutant phenotype	-	-
AAEL005643	guanine nucleotide exchange factor [Source:VB External Description;Acc:AAEL005643]	FBgn0021873	axon target recognition ; GO:0007412 | inferred from mutant phenotype <newline> hemocyte migration ; GO:0035099 | inferred from mutant phenotype <newline> regulation of embryonic cell shape ; GO:0016476 | inferred from mutant phenotype <newline> substrate-dependent cell migration, cell extension ; GO:0006930 | inferred from mutant phenotype <newline> compound eye development ; GO:0048749 | inferr…	intracellular ; GO:0005622 | inferred from electronic annotation with InterPro:IPR000651, InterPro:IPR001895, InterPro:IPR008937	guanyl-nucleotide exchange factor activity ; GO:0005085 | non-traceable author statement <newline> cyclic nucleotide-dependent guanyl-nucleotide exchange factor activity ; GO:0017132 | inferred from sequence or structural similarity with EMBL:AF115480 <newline> guanyl-nucleotide exchange factor activity ; GO:0005085 | inferred from sequence or structural similarity
AAEL005667	LIM domain-binding protein, putative [Source:VB External Description;Acc:AAEL005667]	FBgn0083919	-	muscle tendon junction ; GO:0005927 | inferred from direct assay <newline> Z disc ; GO:0030018 | inferred from direct assay	protein binding ; GO:0005515 | inferred from physical interaction with egg <newline> zinc ion binding ; GO:0008270 | inferred from electronic annotation with InterPro:IPR001781
AAEL005733	myosin heavy chain, nonmuscle or smooth muscle [Source:VB External Description;Acc:AAEL005733]	FBgn0086783	striated muscle contraction ; GO:0006941 | traceable author statement <newline> myofibril assembly ; GO:0030239 | inferred from mutant phenotype <newline> muscle cell differentiation ; GO:0042692 | inferred from mutant phenotype <newline> locomotion ; GO:0040011 | inferred from mutant phenotype <newline> muscle contraction ; GO:0006936 | inferred from mutant phenotype <newline> skeletal muscle my…	muscle myosin complex ; GO:0005859 | inferred from direct assay <newline> striated muscle myosin thick filament ; GO:0005863 | inferred from direct assay <newline> myosin complex ; GO:0016459 | inferred from sequence or structural similarity <newline> muscle myosin complex ; GO:0005859 | inferred from sequence or structural similarity with UniProtKB:P79293 <newline> sarcomere ; GO:0030017 | infer…	structural constituent of muscle ; GO:0008307 | traceable author statement <newline> ATPase activity, coupled ; GO:0042623 | inferred from sequence or structural similarity <newline> microfilament motor activity ; GO:0000146 | inferred from sequence or structural similarity with UniProtKB:P79293 <newline> ATPase activity, coupled ; GO:0042623 | inferred from sequence or structural similarity with…
AAEL005738	yellow protein precursor [Source:VB External Description;Acc:AAEL005738]	FBgn0032601	biological_process ; GO:0008150 | no biological data available	cellular_component ; GO:0005575 | no biological data available	molecular_function ; GO:0003674 | no biological data available
AAEL005818	conserved hypothetical protein [Source:VB External Description;Acc:AAEL005818]	no homolog
AAEL005856	signal recognition particle receptor alpha subunit (sr-alpha) [Source:VB External Description;Acc:AAEL005856]	FBgn0010391	axonogenesis ; GO:0007409 | inferred from expression pattern <newline> regulation of protein secretion ; GO:0050708 | inferred from expression pattern <newline> SRP-dependent cotranslational protein targeting to membrane ; GO:0006614 | inferred from electronic annotation with InterPro:IPR000897, InterPro:IPR013822 <newline> GTP catabolic process ; GO:0006184 | inferred from electronic annotation …	endoplasmic reticulum membrane ; GO:0005789 | inferred from direct assay <newline> signal recognition particle receptor complex ; GO:0005785 | inferred from sequence or structural similarity with NCBI_gi:4507223 <newline> lipid particle ; GO:0005811 | inferred from direct assay	GTP binding ; GO:0005525 | non-traceable author statement <newline> mRNA binding ; GO:0003729 | non-traceable author statement <newline> signal recognition particle binding ; GO:0005047 | inferred from sequence or structural similarity with NCBI_gi:4507223 <newline> GTP binding ; GO:0005525 | inferred from electronic annotation with InterPro:IPR000897, InterPro:IPR007222, InterPro:IPR013822 <newl…
AAEL005875	ionotropic glutamate receptor-invertebrate [Source:VB External Description;Acc:AAEL005875]	no homolog
AAEL005908	rolling pebbles [Source:VB External Description;Acc:AAEL005908]	FBgn0041096	myoblast fusion ; GO:0007520 | non-traceable author statement <newline> myoblast fusion ; GO:0007520 | inferred from mutant phenotype <newline> myoblast fusion ; GO:0007520 | traceable author statement	cytoplasm ; GO:0005737 | inferred from direct assay <newline> adherens junction ; GO:0005912 | inferred from direct assay <newline> cell surface ; GO:0009986 | inferred from direct assay	protein binding ; GO:0005515 | inferred from physical interaction with kirre AND inferred from physical interaction with mbc <newline> zinc ion binding ; GO:0008270 | inferred from electronic annotation with InterPro:IPR001841
AAEL005920	hypothetical protein [Source:VB External Description;Acc:AAEL005920]	no homolog
AAEL005927	d-lactate dehydrognease 2, [Source:VB External Description;Acc:AAEL005927]	no homolog
AAEL005970	conserved hypothetical protein [Source:VB External Description;Acc:AAEL005970]	FBgn0034060	biological_process ; GO:0008150 | no biological data available	cellular_component ; GO:0005575 | no biological data available	molecular_function ; GO:0003674 | no biological data available
AAEL005974	homeobox protein dbx [Source:VB External Description;Acc:AAEL005974]	FBgn0035292
AAEL006019	voltage-gated sodium channel [Source:VB External Description;Acc:AAEL006019]	FBgn0003036
AAEL006043	gc-rich sequence DNA-binding factor [Source:VB External Description;Acc:AAEL006043]	FBgn0037466	nuclear mRNA splicing, via spliceosome ; GO:0000398 | inferred by curator from GO:0071011|GO:0071013 <newline> regulation of transcription, DNA-dependent ; GO:0006355 | inferred from electronic annotation with InterPro:IPR012890, InterPro:IPR022783	precatalytic spliceosome ; GO:0071011 | inferred from direct assay <newline> catalytic step 2 spliceosome ; GO:0071013 | inferred from direct assay	DNA binding ; GO:0003677 | inferred from sequence or structural similarity with EMBL:AC005034 <newline> sequence-specific DNA binding transcription factor activity ; GO:0003700 | inferred from electronic annotation with InterPro:IPR012890
AAEL006050	nuclear RNA export factor 2 (NXF2), putative [Source:VB External Description;Acc:AAEL006050]	FBgn0036640	mRNA export from nucleus ; GO:0006406 | inferred from sequence or structural similarity <newline> mRNA export from nucleus ; GO:0006406 | non-traceable author statement <newline> mRNA transport ; GO:0051028 | inferred from electronic annotation with InterPro:IPR005637	cytoplasm ; GO:0005737 | inferred from direct assay <newline> nucleoplasm ; GO:0005654 | inferred from direct assay <newline> nucleoplasm ; GO:0005654 | non-traceable author statement	-
AAEL006062	neuralized [Source:VB External Description;Acc:AAEL006062]	FBgn0002932	germ-line stem cell maintenance ; GO:0030718 | inferred from mutant phenotype <newline> ectoderm development ; GO:0007398 | traceable author statement <newline> mesoderm development ; GO:0007498 | inferred from mutant phenotype <newline> peripheral nervous system development ; GO:0007422 | inferred from mutant phenotype <newline> ovarian follicle cell development ; GO:0030707 | traceable author s…	plasma membrane ; GO:0005886 | inferred from direct assay <newline> cytoplasm ; GO:0005737 | inferred from direct assay <newline> perinuclear region of cytoplasm ; GO:0048471 | inferred from direct assay <newline> nucleus ; GO:0005634 | non-traceable author statement <newline> endosome ; GO:0005768 | colocalizes_with inferred from direct assay	DNA binding ; GO:0003677 | inferred from sequence or structural similarity <newline> ubiquitin-protein ligase activity ; GO:0004842 | inferred from direct assay <newline> zinc ion binding ; GO:0008270 | inferred from electronic annotation with InterPro:IPR001841
AAEL006082	transcription initiation factor TFIID subunit 1 [Source:VB External Description;Acc:AAEL006082]	FBgn0010355	transcription initiation from RNA polymerase II promoter ; GO:0006367 | inferred from sequence or structural similarity with HGNC_gene:TAF1; HGNC:11535; OMIM:313650 AND inferred from sequence or structural similarity with SGD_LOCUS:TAF1; SGD:S0001039 <newline> protein complex assembly ; GO:0006461 | non-traceable author statement <newline> regulation of transcription, DNA-dependent ; GO:0006355 |…	transcription factor TFIID complex ; GO:0005669 | inferred from sequence or structural similarity with HGNC_gene:TAF1; HGNC:11535; OMIM:313650 AND inferred from sequence or structural similarity with SGD_LOCUS:TAF1; SGD:S0001039 <newline> transcription factor TFIID complex ; GO:0005669 | non-traceable author statement <newline> nucleus ; GO:0005634 | non-traceable author statement <newline> trans…	protein kinase activity ; GO:0004672 | non-traceable author statement <newline> DNA binding ; GO:0003677 | non-traceable author statement <newline> histone serine kinase activity ; GO:0035174 | inferred from direct assay <newline> sequence-specific DNA binding ; GO:0043565 | inferred from direct assay <newline> zinc ion binding ; GO:0008270 | inferred from electronic annotation with InterPro:IPR0…
AAEL006097		FBgn0032057	-	-	carboxylesterase activity ; GO:0004091 | inferred from sequence or structural similarity with EMBL:AB016720; protein_id:BAA32385
AAEL006104		FBgn0032057	-	-	carboxylesterase activity ; GO:0004091 | inferred from sequence or structural similarity with EMBL:AB016720; protein_id:BAA32385
AAEL006126	conserved hypothetical protein [Source:VB External Description;Acc:AAEL006126]	no homolog
AAEL006137	serine protease inhibitor (serpin) homologue - unlikely to be inhibitory. [Source:VB External Description;Acc:AAEL006137]	FBgn0037772	-	-	endopeptidase inhibitor activity ; GO:0004866 | inferred from sequence or structural similarity with NCBI_NP:777246 <newline> serine-type endopeptidase inhibitor activity ; GO:0004867 | inferred from electronic annotation with InterPro:IPR000215
AAEL006138	hypothetical protein [Source:VB External Description;Acc:AAEL006138]	no homolog
AAEL006167	runt [Source:VB External Description;Acc:AAEL006167]	FBgn0003300	germ-band extension ; GO:0007377 | traceable author statement <newline> sex determination, establishment of X:A ratio ; GO:0007540 | traceable author statement <newline> regulation of transcription from RNA polymerase II promoter ; GO:0006357 | non-traceable author statement <newline> sex determination, establishment of X:A ratio ; GO:0007540 | non-traceable author statement <newline> periodic pa…	nucleus ; GO:0005634 | non-traceable author statement <newline> nucleus ; GO:0005634 | inferred from electronic annotation with InterPro:IPR000040, InterPro:IPR012346	sequence-specific DNA binding transcription factor activity ; GO:0003700 | non-traceable author statement <newline> sequence-specific DNA binding ; GO:0043565 | inferred from direct assay <newline> sequence-specific DNA binding transcription factor activity ; GO:0003700 | inferred from direct assay <newline> ATP binding ; GO:0005524 | inferred from electronic annotation with InterPro:IPR000040
AAEL006229	hypothetical protein [Source:VB External Description;Acc:AAEL006229]	no homolog
AAEL006232	GPCR Orphan/Putative Class D Family [Source:VB External Description;Acc:AAEL006232]	no homolog
AAEL006314	upstream transcription factor [Source:VB External Description;Acc:AAEL006314]	FBgn0029711	transcription, DNA-dependent ; GO:0006351 | inferred from sequence or structural similarity with UniProtKB:Q63665	nucleus ; GO:0005634 | inferred from sequence or structural similarity with UniProtKB:Q63665	sequence-specific DNA binding transcription factor activity ; GO:0003700 | inferred from sequence or structural similarity with UniProtKB:Q63665
AAEL006341	conserved hypothetical protein [Source:VB External Description;Acc:AAEL006341]	FBgn0036481	-	-	-
AAEL006347	Apyrase Precursor (EC 3.6.1.5)(Adenosine diphosphatase)(ATP-diphosphohydrolase)(ATP-diphosphatase)(ADPase)(Allergen Aed a 1) [Source:VB External Description;Acc:AAEL006347]	FBgn0030264
AAEL006362	mitochondrial solute carrier [Source:VB External Description;Acc:AAEL006362]	FBgn0028646	transport ; GO:0006810 | non-traceable author statement <newline> mitochondrial transport ; GO:0006839 | inferred from sequence or structural similarity with UniProtKB:O75746 AND inferred from sequence or structural similarity with UniProt:Q9UJS0 <newline> transmembrane transport ; GO:0055085 | inferred from electronic annotation with InterPro:IPR002067	mitochondrial envelope ; GO:0005740 | inferred from sequence or structural similarity <newline> integral to membrane ; GO:0016021 | non-traceable author statement <newline> mitochondrial inner membrane ; GO:0005743 | non-traceable author statement <newline> mitochondrial inner membrane ; GO:0005743 | inferred from sequence or structural similarity with UniProtKB:O75746 AND inferred from sequence …	calcium ion binding ; GO:0005509 | non-traceable author statement <newline> calcium ion binding ; GO:0005509 | inferred from sequence or structural similarity with UniProtKB:O75746 AND inferred from sequence or structural similarity with UniProt:Q9UJS0 <newline> transmembrane transporter activity ; GO:0022857 | non-traceable author statement <newline> transmembrane transporter activity ; GO:00228…
AAEL006372	sulphate transporter [Source:VB External Description;Acc:AAEL006372]	no homolog
AAEL006411	timeless protein [Source:VB External Description;Acc:AAEL006411]	FBgn0014396	locomotor rhythm ; GO:0045475 | inferred from genetic interaction with jet <newline> mating behavior ; GO:0007617 | inferred from mutant phenotype <newline> circadian behavior ; GO:0048512 | inferred from mutant phenotype <newline> circadian rhythm ; GO:0007623 | non-traceable author statement <newline> eclosion rhythm ; GO:0008062 | non-traceable author statement <newline> locomotor rhythm ; GO:…	cytoplasm ; GO:0005737 | inferred from direct assay <newline> nucleus ; GO:0005634 | inferred from direct assay <newline> nucleus ; GO:0005634 | non-traceable author statement <newline> cytoplasm ; GO:0005737 | non-traceable author statement <newline> nucleus ; GO:0005634 | traceable author statement <newline> protein complex ; GO:0043234 | inferred from physical interaction with cry	protein heterodimerization activity ; GO:0046982 | traceable author statement <newline> protein heterodimerization activity ; GO:0046982 | non-traceable author statement <newline> protein binding ; GO:0005515 | inferred from physical interaction with cry
AAEL006436	phosphorylase b kinase beta, kpbb [Source:VB External Description;Acc:AAEL006436]	FBgn0031995	glycogen metabolic process ; GO:0005977 | non-traceable author statement <newline> glycogen metabolic process ; GO:0005977 | inferred from electronic annotation with InterPro:IPR008734	phosphorylase kinase complex ; GO:0005964 | inferred from sequence or structural similarity with UniProtKB:P12798	phosphorylase kinase regulator activity ; GO:0008607 | inferred from sequence or structural similarity with UniProtKB:P12798 <newline> glucan 1,4-alpha-glucosidase activity ; GO:0004339 | inferred from electronic annotation with InterPro:IPR011613 <newline> calmodulin binding ; GO:0005516 | inferred from electronic annotation with InterPro:IPR008734
AAEL006447	GATA transcription factor (GATAb) [Source:VB External Description;Acc:AAEL006447]	FBgn0032223	regulation of transcription, DNA-dependent ; GO:0006355 | inferred from electronic annotation with InterPro:IPR000679, InterPro:IPR013088	nucleus ; GO:0005634 | non-traceable author statement <newline> nucleus ; GO:0005634 | inferred from electronic annotation with InterPro:IPR012934	sequence-specific DNA binding ; GO:0043565 | inferred from electronic annotation with InterPro:IPR000679 <newline> zinc ion binding ; GO:0008270 | inferred from electronic annotation with InterPro:IPR000679, InterPro:IPR012934, InterPro:IPR013088 <newline> sequence-specific DNA binding transcription factor activity ; GO:0003700 | inferred from electronic annotation with InterPro:IPR000679
AAEL006452	n-acetylgalactosaminyltransferase [Source:VB External Description;Acc:AAEL006452]	FBgn0027558	oligosaccharide biosynthetic process ; GO:0009312 | inferred from direct assay <newline> O-glycan processing ; GO:0016266 | inferred from direct assay <newline> regulation of cell adhesion mediated by integrin ; GO:0033628 | inferred from mutant phenotype <newline> protein O-linked glycosylation ; GO:0006493 | inferred from direct assay inferred from mutant phenotype <newline> extracellular matri…	Golgi stack ; GO:0005795 | non-traceable author statement <newline> Golgi apparatus ; GO:0005794 | inferred from direct assay	polypeptide N-acetylgalactosaminyltransferase activity ; GO:0004653 | inferred from direct assay <newline> polypeptide N-acetylgalactosaminyltransferase activity ; GO:0004653 | inferred from sequence or structural similarity with EMBL:U73820 <newline> acetylgalactosaminyltransferase activity ; GO:0008376 | inferred from direct assay <newline> transferase activity, transferring glycosyl groups ; G…
AAEL006455	calcium-activated potassium channel [Source:VB External Description;Acc:AAEL006455]	FBgn0029761	potassium ion transport ; GO:0006813 | inferred from sequence or structural similarity with UniProtKB:P70604	integral to membrane ; GO:0016021 | inferred from sequence or structural similarity with UniProtKB:P70604	small conductance calcium-activated potassium channel activity ; GO:0016286 | inferred from sequence or structural similarity <newline> calcium-activated potassium channel activity ; GO:0015269 | inferred from sequence or structural similarity with EMBL:U69882 <newline> small conductance calcium-activated potassium channel activity ; GO:0016286 | inferred from sequence or structural similarity wi…
AAEL006467	alcohol dehydrogenase [Source:VB External Description;Acc:AAEL006467]	FBgn0011768	alcohol metabolic process ; GO:0006066 | inferred by curator from GO:0004022 <newline> regulation of nitric oxide metabolic process ; GO:0080164 | inferred by curator from GO:0080007 <newline> regulation of peptidyl-cysteine S-nitrosylation ; GO:2000169 | inferred from mutant phenotype <newline> visual learning ; GO:0008542 | inferred from mutant phenotype <newline> ethanol oxidation ; GO:0006069…	-	S-(hydroxymethyl)glutathione dehydrogenase activity ; GO:0051903 | inferred from direct assay <newline> octanol dehydrogenase activity ; GO:0004552 | inferred from direct assay <newline> alcohol dehydrogenase (NAD) activity ; GO:0004022 | inferred from direct assay <newline> S-nitrosoglutathione reductase activity ; GO:0080007 | inferred from mutant phenotype <newline> zinc ion binding ; GO:00082…
AAEL006472	rabconnectin [Source:VB External Description;Acc:AAEL006472]	FBgn0023458	open tracheal system development ; GO:0007424 | inferred from mutant phenotype <newline> vacuolar acidification ; GO:0007035 | inferred from mutant phenotype <newline> regulation of Notch signaling pathway ; GO:0008593 | inferred from mutant phenotype	-	-
AAEL006564	mitochondrial RNA splicing protein [Source:VB External Description;Acc:AAEL006564]	FBgn0039561	mitochondrial iron ion transport ; GO:0048250 | inferred from sequence or structural similarity with UniProtKB:Q920G8 <newline> spermatid differentiation ; GO:0048515 | inferred from mutant phenotype <newline> transmembrane transport ; GO:0055085 | inferred from electronic annotation with InterPro:IPR002067	mitochondrial envelope ; GO:0005740 | inferred from sequence or structural similarity <newline> mitochondrial inner membrane ; GO:0005743 | inferred from sequence or structural similarity with UniProtKB:Q920G8 <newline> mitochondrion ; GO:0005739 | inferred from direct assay	iron ion transmembrane transporter activity ; GO:0005381 | inferred from sequence or structural similarity with UniProtKB:Q920G8 <newline> transmembrane transporter activity ; GO:0022857 | inferred from sequence or structural similarity <newline> binding ; GO:0005488 | inferred from electronic annotation with InterPro:IPR002067
AAEL006573	conserved hypothetical protein [Source:VB External Description;Acc:AAEL006573]	FBgn0033919	-	-	-
AAEL006574	nuclear transcription factor, x-box binding 1 (nfx1) [Source:VB External Description;Acc:AAEL006574]	FBgn0035518	regulation of transcription, DNA-dependent ; GO:0006355 | inferred from electronic annotation with InterPro:IPR000967	nucleus ; GO:0005634 | inferred from sequence or structural similarity with EMBL:U15306; protein_id:AAA69517.1	sequence-specific DNA binding transcription factor activity ; GO:0003700 | inferred from sequence or structural similarity with EMBL:U15306; protein_id:AAA69517.1 <newline> zinc ion binding ; GO:0008270 | inferred from electronic annotation with InterPro:IPR000967, InterPro:IPR001841
AAEL006593	conserved hypothetical protein [Source:VB External Description;Acc:AAEL006593]	FBgn0000492	glial cell development ; GO:0021782 | inferred from mutant phenotype <newline> dorsal/ventral pattern formation, imaginal disc ; GO:0007450 | inferred from mutant phenotype <newline> imaginal disc-derived wing morphogenesis ; GO:0007476 | inferred from mutant phenotype <newline> regulation of cell fate specification ; GO:0042659 | inferred from mutant phenotype <newline> ventral cord development …	nucleus ; GO:0005634 | inferred from sequence or structural similarity with UniProtKB:Q03357	DNA binding ; GO:0003677 | inferred from sequence or structural similarity with MGD:Msx1; MGI:MGI:97168 <newline> sequence-specific DNA binding transcription factor activity ; GO:0003700 | inferred from sequence or structural similarity with UniProtKB:Q03357 <newline> sequence-specific DNA binding ; GO:0043565 | inferred from electronic annotation with InterPro:IPR001356, InterPro:IPR017970
AAEL006633	inhibitorof apoptosis [Source:VB External Description;Acc:AAEL006633]	FBgn0015247	anti-apoptosis ; GO:0006916 | inferred from sequence or structural similarity <newline> anti-apoptosis ; GO:0006916 | inferred from direct assay <newline> anti-apoptosis ; GO:0006916 | inferred from sequence or structural similarity with UniProtKB:Q13490 <newline> anti-apoptosis ; GO:0006916 | non-traceable author statement <newline> anti-apoptosis ; GO:0006916 | traceable author statement <newli…	intracellular ; GO:0005622 | inferred from electronic annotation with InterPro:IPR001370	zinc ion binding ; GO:0008270 | inferred from electronic annotation with InterPro:IPR001841
AAEL006687	exportin [Source:VB External Description;Acc:AAEL006687]	no homolog
AAEL006749	conserved hypothetical protein [Source:VB External Description;Acc:AAEL006749]	FBgn0029697	-	chorion ; GO:0042600 | inferred from direct assay	-
AAEL006780	hypothetical protein [Source:VB External Description;Acc:AAEL006780]	FBgn0036555
AAEL006797	F-box/leucine rich repeat protein [Source:VB External Description;Acc:AAEL006797]	FBgn0038385	-	-	-
AAEL006798	cytochrome P450 [Source:VB External Description;Acc:AAEL006798]	no homolog
AAEL006799	conserved hypothetical protein [Source:VB External Description;Acc:AAEL006799]	FBgn0033376	nuclear-transcribed mRNA catabolic process ; GO:0000956 | inferred from mutant phenotype	-	binding ; GO:0005488 | inferred from electronic annotation with InterPro:IPR011990
AAEL006853	conserved hypothetical protein [Source:VB External Description;Acc:AAEL006853]	no homolog
AAEL006864	conserved hypothetical protein [Source:VB External Description;Acc:AAEL006864]	no homolog
AAEL006897	conserved hypothetical protein [Source:VB External Description;Acc:AAEL006897]	FBgn0053208	axon guidance ; GO:0007411 | inferred from mutant phenotype <newline> axon guidance ; GO:0007411 | traceable author statement <newline> sarcomere organization ; GO:0045214 | inferred from mutant phenotype <newline> dendrite morphogenesis ; GO:0048813 | inferred from genetic interaction with Sox14 inferred from mutant phenotype <newline> neuron remodeling ; GO:0016322 | inferred from genetic inter…	cytosol ; GO:0005829 | non-traceable author statement <newline> plasma membrane ; GO:0005886 | inferred from direct assay <newline> terminal button ; GO:0043195 | inferred from direct assay	actin binding ; GO:0003779 | inferred from sequence or structural similarity with UniProtKB:Q07931 <newline> electron carrier activity ; GO:0009055 | inferred from electronic annotation with InterPro:IPR003953 <newline> zinc ion binding ; GO:0008270 | inferred from electronic annotation with InterPro:IPR001781 <newline> oxidoreductase activity ; GO:0016491 | inferred from electronic annotation wi…
AAEL006956	suppressor of ty [Source:VB External Description;Acc:AAEL006956]	FBgn0028982	transcription from RNA polymerase II promoter ; GO:0006366 | inferred from expression pattern <newline> regulation of antimicrobial peptide biosynthetic process ; GO:0002805 | inferred from mutant phenotype <newline> regulation of transcription from RNA polymerase II promoter ; GO:0006357 | inferred from electronic annotation with InterPro:IPR017072 <newline> regulation of transcription elongatio…	polytene chromosome puff ; GO:0005703 | inferred from direct assay <newline> polytene chromosome interband ; GO:0005705 | inferred from direct assay <newline> histone locus body ; GO:0035363 | inferred from direct assay <newline> nuclear exosome (RNase complex) ; GO:0000176 | colocalizes_with inferred from direct assay <newline> transcriptionally active chromatin ; GO:0035327 | inferred from dire…	chromatin binding ; GO:0003682 | inferred from sequence or structural similarity <newline> chromatin binding ; GO:0003682 | inferred from sequence or structural similarity with SGD_LOCUS:SPT6; SGD:S0003348 <newline> hydrolase activity, acting on ester bonds ; GO:0016788 | inferred from electronic annotation with InterPro:IPR006641 <newline> RNA binding ; GO:0003723 | inferred from electronic anno…
AAEL006977	serine/threonine protein phosphatase 2a regulatory subunit a [Source:VB External Description;Acc:AAEL006977]	FBgn0005776
AAEL006994	myosin heavy chain, putative [Source:VB External Description;Acc:AAEL006994]	FBgn0085454	biological_process ; GO:0008150 | no biological data available	cellular_component ; GO:0005575 | no biological data available	ATP binding ; GO:0005524 | inferred from electronic annotation with InterPro:IPR003594
AAEL007017	conserved hypothetical protein [Source:VB External Description;Acc:AAEL007017]	FBgn0032724	biological_process ; GO:0008150 | no biological data available	cellular_component ; GO:0005575 | no biological data available	-
AAEL007021	hypothetical protein [Source:VB External Description;Acc:AAEL007021]	no homolog
AAEL007026	conserved hypothetical protein [Source:VB External Description;Acc:AAEL007026]	FBgn0025820	-	integral to membrane ; GO:0016021 | inferred from electronic annotation with InterPro:IPR008657	-
AAEL007028	ceramidase [Source:VB External Description;Acc:AAEL007028]	FBgn0039774	hatching behavior ; GO:0035187 | inferred from mutant phenotype <newline> synaptic transmission ; GO:0007268 | inferred from mutant phenotype <newline> synaptic vesicle exocytosis ; GO:0016079 | inferred from mutant phenotype <newline> sphingolipid metabolic process ; GO:0006665 | inferred from direct assay <newline> ceramide catabolic process ; GO:0046514 | inferred from direct assay <newline> s…	cytoplasm ; GO:0005737 | inferred from direct assay <newline> extracellular region ; GO:0005576 | inferred from direct assay	ceramidase activity ; GO:0017040 | inferred from direct assay <newline> ceramidase activity ; GO:0017040 | non-traceable author statement <newline> ceramidase activity ; GO:0017040 | inferred from mutant phenotype
AAEL007035	tak1 [Source:VB External Description;Acc:AAEL007035]	FBgn0026323	JNK cascade ; GO:0007254 | traceable author statement <newline> apoptosis ; GO:0006915 | inferred from mutant phenotype <newline> JNK cascade ; GO:0007254 | inferred from genetic interaction with bsk AND inferred from genetic interaction with hep <newline> apoptosis ; GO:0006915 | inferred from genetic interaction with W AND inferred from genetic interaction with grim AND inferred from genetic in…	cellular_component ; GO:0005575 | no biological data available	MAP kinase kinase kinase activity ; GO:0004709 | inferred from sequence or structural similarity <newline> MAP kinase kinase kinase activity ; GO:0004709 | inferred from sequence or structural similarity with NCBI_NP:663305 <newline> protein kinase activity ; GO:0004672 | non-traceable author statement <newline> JUN kinase kinase kinase activity ; GO:0004706 | inferred from mutant phenotype <newl…
AAEL007041	low-density lipoprotein receptor (ldl) [Source:VB External Description;Acc:AAEL007041]	FBgn0053087	-	-	low-density lipoprotein receptor activity ; GO:0005041 | inferred from sequence or structural similarity with UniProtKB:O75097 <newline> calcium ion binding ; GO:0005509 | inferred from electronic annotation with InterPro:IPR001881, InterPro:IPR018097
AAEL007048	hypothetical protein [Source:VB External Description;Acc:AAEL007048]	no homolog
AAEL007057	retinoid-inducible serine carboxypeptidase (serine carboxypeptidase [Source:VB External Description;Acc:AAEL007057]	FBgn0035154	proteolysis ; GO:0006508 | inferred from electronic annotation with InterPro:IPR001563	-	serine-type carboxypeptidase activity ; GO:0004185 | inferred from sequence or structural similarity with UniProtKB:Q9HB40 <newline> serine-type carboxypeptidase activity ; GO:0004185 | inferred from sequence or structural similarity with EMBL:AF282618; protein_id:AAG16692 AND inferred from sequence or structural similarity with MGD:Risc-pending; MGI:MGI:1921867
AAEL007065	ADP-ribosylation factor, arf [Source:VB External Description;Acc:AAEL007065]	FBgn0010348	protein ADP-ribosylation ; GO:0006471 | inferred from sequence or structural similarity with UniProtKB:P51643 <newline> protein ADP-ribosylation ; GO:0006471 | non-traceable author statement <newline> neurotransmitter secretion ; GO:0007269 | traceable author statement <newline> synaptic vesicle endocytosis ; GO:0048488 | traceable author statement <newline> cell adhesion ; GO:0007155 | inferred …	intracellular ; GO:0005622 | inferred from electronic annotation with InterPro:IPR024156	GTP binding ; GO:0005525 | inferred from sequence or structural similarity with MGD:Arf2; MGI:MGI:99595 <newline> GTP binding ; GO:0005525 | non-traceable author statement <newline> GTPase activity ; GO:0003924 | inferred from sequence or structural similarity
AAEL007152	hypothetical protein [Source:VB External Description;Acc:AAEL007152]	FBgn0037540	protein-DNA complex assembly ; GO:0065004 | inferred from direct assay <newline> snRNA transcription from RNA polymerase II promoter ; GO:0042795 | inferred from direct assay <newline> snRNA transcription from RNA polymerase III promoter ; GO:0042796 | inferred from direct assay <newline> lateral inhibition ; GO:0046331 | inferred from mutant phenotype <newline> regulation of transcription, DNA-d…	snRNA-activating protein complex ; GO:0019185 | inferred from direct assay <newline> snRNA-activating protein complex ; GO:0019185 | inferred from physical interaction with Pbp45 inferred from physical interaction with Pbp49	DNA binding ; GO:0003677 | inferred from direct assay <newline> sequence-specific DNA binding ; GO:0043565 | inferred from direct assay <newline> bent DNA binding ; GO:0003681 | inferred from direct assay <newline> protein binding ; GO:0005515 | inferred from physical interaction with Pbp45
AAEL007178	hypothetical protein [Source:VB External Description;Acc:AAEL007178]	FBgn0035086	-	-	-
AAEL007195	netrin receptor (unc5) [Source:VB External Description;Acc:AAEL007195]	no homolog
AAEL007201	glutamyl aminopeptidase [Source:VB External Description;Acc:AAEL007201]	FBgn0038135	dsRNA transport ; GO:0033227 | inferred from mutant phenotype <newline> proteolysis ; GO:0006508 | inferred from electronic annotation with InterPro:IPR001930	-	aminopeptidase activity ; GO:0004177 | inferred from sequence or structural similarity with UniProtKB:Q07075 <newline> metallopeptidase activity ; GO:0008237 | inferred from electronic annotation with InterPro:IPR014782 <newline> zinc ion binding ; GO:0008270 | inferred from electronic annotation with InterPro:IPR014782
AAEL007220	conserved hypothetical protein [Source:VB External Description;Acc:AAEL007220]	no homolog
AAEL007225	dynein heavy chain [Source:VB External Description;Acc:AAEL007225]	FBgn0001314	microtubule-based movement ; GO:0007018 | inferred from sequence or structural similarity <newline> microtubule-based movement ; GO:0007018 | inferred from electronic annotation with InterPro:IPR004273	axonemal dynein complex ; GO:0005858 | non-traceable author statement <newline> axonemal dynein complex ; GO:0005858 | inferred from sequence or structural similarity <newline> axonemal dynein complex ; GO:0005858 | inferred from sequence or structural similarity with EMBL:AL034345; protein_id:CAB41297.1 <newline> microtubule associated complex ; GO:0005875 | inferred from sequence or structural …	microtubule binding ; GO:0008017 | non-traceable author statement <newline> ATPase activity, coupled ; GO:0042623 | inferred from sequence or structural similarity <newline> motor activity ; GO:0003774 | inferred from sequence or structural similarity with EMBL:AL034345; protein_id:CAB41297.1 <newline> ATPase activity, coupled ; GO:0042623 | inferred from sequence or structural similarity with CG…
AAEL007240	cdc42 GTPase-activating protein [Source:VB External Description;Acc:AAEL007240]	FBgn0032821	retinal ganglion cell axon guidance ; GO:0031290 | inferred from mutant phenotype <newline> signal transduction ; GO:0007165 | inferred from electronic annotation with InterPro:IPR000198, InterPro:IPR008936	intracellular ; GO:0005622 | inferred from electronic annotation with InterPro:IPR000198, InterPro:IPR008936	GTPase activator activity ; GO:0005096 | inferred from sequence or structural similarity <newline> GTPase activator activity ; GO:0005096 | inferred from sequence or structural similarity with SGD_LOCUS:RGA1; SGD:S0005653
AAEL007248	hypothetical protein [Source:VB External Description;Acc:AAEL007248]	no homolog
AAEL007249	hypothetical protein [Source:VB External Description;Acc:AAEL007249]	no homolog
AAEL007250	conserved hypothetical protein [Source:VB External Description;Acc:AAEL007250]	FBgn0053209
AAEL007270	hypothetical protein [Source:VB External Description;Acc:AAEL007270]	no homolog
AAEL007289	NBP2b protein, putative [Source:VB External Description;Acc:AAEL007289]	FBgn0038746	respiratory chain complex IV assembly ; GO:0008535 | non-traceable author statement <newline> ribosome biogenesis ; GO:0042254 | inferred from sequence or structural similarity with UniProtKB:P70279 <newline> neurogenesis ; GO:0022008 | inferred from mutant phenotype	nucleolus ; GO:0005730 | inferred from sequence or structural similarity <newline> nucleolus ; GO:0005730 | inferred from sequence or structural similarity with UniProtKB:P70279	heme transporter activity ; GO:0015232 | non-traceable author statement
AAEL007351	conserved hypothetical protein [Source:VB External Description;Acc:AAEL007351]	FBgn0037378	-	-	-
AAEL007360	lethal(3)malignant brain tumor [Source:VB External Description;Acc:AAEL007360]	FBgn0003334	gene silencing ; GO:0016458 | inferred from genetic interaction with ph-p AND inferred from mutant phenotype <newline> germarium-derived female germ-line cyst encapsulation ; GO:0030708 | inferred from mutant phenotype <newline> ovarian follicle cell stalk formation ; GO:0030713 | inferred from mutant phenotype <newline> neurogenesis ; GO:0022008 | inferred from mutant phenotype <newline> axonoge…	nucleus ; GO:0005634 | non-traceable author statement <newline> PRC1 complex ; GO:0035102 | traceable author statement <newline> nucleus ; GO:0005634 | inferred from direct assay	sequence-specific DNA binding transcription factor activity ; GO:0003700 | non-traceable author statement <newline> protein binding ; GO:0005515 | inferred from physical interaction with UniProtKB:P41046 <newline> protein binding ; GO:0005515 | inferred from physical interaction with Sfmbt <newline> zinc ion binding ; GO:0008270 | inferred from electronic annotation with InterPro:IPR010507, Inter…
AAEL007389	GPCR (Rhod)opsin Family [Source:VB External Description;Acc:AAEL007389]	FBgn0019940	phototransduction ; GO:0007602 | inferred from sequence or structural similarity with Rh2 AND inferred from sequence or structural similarity with Rh3 AND inferred from sequence or structural similarity with Rh4 AND inferred from sequence or structural similarity with ninaE <newline> phototransduction ; GO:0007602 | inferred from genetic interaction with ninaE <newline> phototransduction ; GO:000…	rhabdomere ; GO:0016028 | inferred from direct assay <newline> integral to membrane ; GO:0016021 | non-traceable author statement <newline> integral to membrane ; GO:0016021 | inferred from sequence or structural similarity <newline> integral to membrane ; GO:0016021 | inferred from electronic annotation with InterPro:IPR000276, InterPro:IPR001735, InterPro:IPR001760	G-protein coupled photoreceptor activity ; GO:0008020 | inferred from sequence or structural similarity with Rh2 AND inferred from sequence or structural similarity with Rh3 AND inferred from sequence or structural similarity with Rh4 AND inferred from sequence or structural similarity with ninaE <newline> G-protein coupled photoreceptor activity ; GO:0008020 | inferred from genetic interaction w…
AAEL007393	hypothetical protein [Source:VB External Description;Acc:AAEL007393]	no homolog
AAEL007397	Ecdysone-inducedprotein 75B isoform A,Nuclear receptor [Source:VB External Description;Acc:AAEL007397]	FBgn0000568	ecdysone-mediated induction of salivary gland cell autophagic cell death ; GO:0035072 | non-traceable author statement <newline> ecdysis, chitin-based cuticle ; GO:0018990 | inferred from mutant phenotype <newline> molting cycle, chitin-based cuticle ; GO:0007591 | inferred from mutant phenotype <newline> regulation of ecdysteroid metabolic process ; GO:0007553 | inferred from mutant phenotype <n…	nucleus ; GO:0005634 | inferred from sequence or structural similarity with EMBL:U09504 <newline> nucleus ; GO:0005634 | non-traceable author statement	ligand-dependent nuclear receptor activity ; GO:0004879 | inferred from sequence or structural similarity with EMBL:U09504 <newline> ligand-dependent nuclear receptor activity ; GO:0004879 | non-traceable author statement <newline> heme binding ; GO:0020037 | inferred from direct assay <newline> sequence-specific DNA binding transcription factor activity ; GO:0003700 | inferred from sequence or s…
AAEL007447	hypothetical protein [Source:VB External Description;Acc:AAEL007447]	FBgn0051992	nuclear-transcribed mRNA catabolic process, nonsense-mediated decay ; GO:0000184 | NOT inferred from mutant phenotype <newline> gene silencing by miRNA ; GO:0035195 | inferred from mutant phenotype <newline> embryonic development via the syncytial blastoderm ; GO:0001700 | inferred from direct assay <newline> mRNA catabolic process ; GO:0006402 | inferred from mutant phenotype	cytoplasmic mRNA processing body ; GO:0000932 | inferred from direct assay	nucleic acid binding ; GO:0003676 | inferred from electronic annotation with InterPro:IPR000504 <newline> nucleotide binding ; GO:0000166 | inferred from electronic annotation with InterPro:IPR012677
AAEL007465	conserved hypothetical protein [Source:VB External Description;Acc:AAEL007465]	no homolog
AAEL007489	synaptic vesicle protein [Source:VB External Description;Acc:AAEL007489]	FBgn0040350	lateral inhibition ; GO:0046331 | inferred from mutant phenotype <newline> transmembrane transport ; GO:0055085 | inferred from electronic annotation with InterPro:IPR011701	integral to membrane ; GO:0016021 | inferred from electronic annotation with InterPro:IPR011701	-
AAEL007534	conserved hypothetical protein [Source:VB External Description;Acc:AAEL007534]	FBgn0043806	biological_process ; GO:0008150 | no biological data available	cellular_component ; GO:0005575 | no biological data available	molecular_function ; GO:0003674 | no biological data available
AAEL007556	hypothetical protein [Source:VB External Description;Acc:AAEL007556]	FBgn0051908	-	-	-
AAEL007559	guanyl-nucleotide exchange factor, putative [Source:VB External Description;Acc:AAEL007559]	FBgn0085422	regulation of small GTPase mediated signal transduction ; GO:0051056 | inferred from electronic annotation with InterPro:IPR000651	intracellular ; GO:0005622 | inferred from electronic annotation with InterPro:IPR000651, InterPro:IPR001895, InterPro:IPR008937	guanyl-nucleotide exchange factor activity ; GO:0005085 | inferred from electronic annotation with InterPro:IPR000651, InterPro:IPR001895, InterPro:IPR008937
AAEL007605	hypothetical protein [Source:VB External Description;Acc:AAEL007605]	FBgn0004198	dendrite morphogenesis ; GO:0048813 | inferred from mutant phenotype <newline> Malpighian tubule morphogenesis ; GO:0007443 | traceable author statement <newline> central nervous system development ; GO:0007417 | traceable author statement <newline> female gonad development ; GO:0008585 | traceable author statement <newline> peripheral nervous system development ; GO:0007422 | traceable author st…	nucleus ; GO:0005634 | inferred from direct assay <newline> nucleus ; GO:0005634 | non-traceable author statement	DNA binding ; GO:0003677 | traceable author statement <newline> DNA binding ; GO:0003677 | non-traceable author statement <newline> sequence-specific DNA binding transcription factor activity ; GO:0003700 | non-traceable author statement <newline> sequence-specific DNA binding ; GO:0043565 | inferred from electronic annotation with InterPro:IPR001356, InterPro:IPR017970 <newline> sequence-specifi…
AAEL007609	histone H2A [Source:VB External Description;Acc:AAEL007609]	FBgn0001197	chromatin assembly or disassembly ; GO:0006333 | non-traceable author statement <newline> response to DNA damage stimulus ; GO:0006974 | inferred from mutant phenotype <newline> nucleosome assembly ; GO:0006334 | inferred from electronic annotation with InterPro:IPR002119	lipid particle ; GO:0005811 | inferred from direct assay <newline> chromosome ; GO:0005694 | inferred from direct assay <newline> nucleus ; GO:0005634 | inferred from direct assay <newline> polytene chromosome ; GO:0005700 | inferred from direct assay <newline> nucleosome ; GO:0000786 | non-traceable author statement <newline> nucleosome ; GO:0000786 | inferred from electronic annotation with Int…	DNA binding ; GO:0003677 | non-traceable author statement <newline> DNA binding ; GO:0003677 | inferred from electronic annotation with InterPro:IPR002119, InterPro:IPR007125, InterPro:IPR009072
AAEL007658	partitioning defective 3, par-3 [Source:VB External Description;Acc:AAEL007658]	FBgn0000163	establishment or maintenance of polarity of embryonic epithelium ; GO:0016332 | non-traceable author statement <newline> ovarian follicle cell-cell adhesion ; GO:0007299 | inferred from mutant phenotype <newline> establishment of apical/basal cell polarity ; GO:0035089 | inferred from mutant phenotype <newline> morphogenesis of a polarized epithelium ; GO:0001738 | traceable author statement <new…	apical cortex ; GO:0045179 | non-traceable author statement <newline> apical plasma membrane ; GO:0016324 | traceable author statement <newline> subapical complex ; GO:0035003 | traceable author statement <newline> apical cortex ; GO:0045179 | traceable author statement <newline> apical part of cell ; GO:0045177 | non-traceable author statement <newline> apicolateral plasma membrane ; GO:0016327 …	protein kinase C binding ; GO:0005080 | inferred from sequence or structural similarity with EMBL:AB005549; protein_id:BAA34216 <newline> phosphatidylinositol binding ; GO:0035091 | inferred from direct assay <newline> protein binding ; GO:0005515 | inferred from physical interaction with Traf4
AAEL007659	hypothetical protein [Source:VB External Description;Acc:AAEL007659]	no homolog
AAEL007700	ERm [Source:VB External Description;Acc:AAEL007700]	FBgn0039225	regulation of transcription, DNA-dependent ; GO:0006355 | inferred from sequence or structural similarity with UniProtKB:P41161	nucleus ; GO:0005634 | inferred from sequence or structural similarity with UniProtKB:P41161	DNA binding ; GO:0003677 | inferred from sequence or structural similarity with UniProtKB:P41161 <newline> sequence-specific DNA binding transcription factor activity ; GO:0003700 | inferred from sequence or structural similarity with UniProtKB:P41161 <newline> sequence-specific DNA binding ; GO:0043565 | inferred from electronic annotation with InterPro:IPR000418
AAEL007720	conserved hypothetical protein [Source:VB External Description;Acc:AAEL007720]	FBgn0036236	-	-	-
AAEL007724	conserved hypothetical protein [Source:VB External Description;Acc:AAEL007724]	no homolog
AAEL007729	conserved hypothetical protein [Source:VB External Description;Acc:AAEL007729]	FBgn0037082	-	-	-
AAEL007732	peptidyl-glycine alpha-amidating monooxygenase [Source:VB External Description;Acc:AAEL007732]	FBgn0020623
AAEL007748	ClassB Scavenger Receptor (CD36 domain). [Source:VB External Description;Acc:AAEL007748]	FBgn0031970	defense response ; GO:0006952 | non-traceable author statement <newline> cell adhesion ; GO:0007155 | inferred from electronic annotation with InterPro:IPR002159	integral to plasma membrane ; GO:0005887 | non-traceable author statement <newline> membrane ; GO:0016020 | inferred from electronic annotation with InterPro:IPR002159	scavenger receptor activity ; GO:0005044 | non-traceable author statement
AAEL007756	neural stem cell-derived dendrite regulator [Source:VB External Description;Acc:AAEL007756]	FBgn0053174
AAEL007791	conserved hypothetical protein [Source:VB External Description;Acc:AAEL007791]	no homolog
AAEL007822	ubiquitin-conjugating enzyme E2 g [Source:VB External Description;Acc:AAEL007822]	FBgn0015374	male courtship behavior ; GO:0008049 | inferred from mutant phenotype <newline> spermatogenesis ; GO:0007283 | inferred from mutant phenotype <newline> male meiosis ; GO:0007140 | inferred from mutant phenotype <newline> courtship behavior ; GO:0007619 | traceable author statement <newline> spermatogenesis ; GO:0007283 | traceable author statement <newline> courtship behavior ; GO:0007619 | non-t…	-	ubiquitin-protein ligase activity ; GO:0004842 | inferred from sequence or structural similarity <newline> ubiquitin-protein ligase activity ; GO:0004842 | non-traceable author statement <newline> ubiquitin-protein ligase activity ; GO:0004842 | inferred from sequence or structural similarity with UniProtKB:O00102
AAEL007861	hypothetical protein [Source:VB External Description;Acc:AAEL007861]	no homolog
AAEL007882	histone H1, putative [Source:VB External Description;Acc:AAEL007882]	no homolog
AAEL007943	conserved hypothetical protein [Source:VB External Description;Acc:AAEL007943]	FBgn0030655	biological_process ; GO:0008150 | no biological data available	cellular_component ; GO:0005575 | no biological data available	catalytic activity ; GO:0003824 | inferred from electronic annotation with InterPro:IPR011146, InterPro:IPR011151
AAEL007950	eps-15 [Source:VB External Description;Acc:AAEL007950]	FBgn0035060	receptor-mediated endocytosis ; GO:0006898 | non-traceable author statement <newline> vesicle-mediated transport ; GO:0016192 | inferred from mutant phenotype <newline> neurotransmitter secretion ; GO:0007269 | non-traceable author statement <newline> synaptic vesicle endocytosis ; GO:0048488 | traceable author statement <newline> synaptic vesicle endocytosis ; GO:0048488 | inferred from mutant p…	synaptic vesicle ; GO:0008021 | colocalizes_with inferred from direct assay	calcium ion binding ; GO:0005509 | inferred from electronic annotation with InterPro:IPR002048, InterPro:IPR011992
AAEL007967	conserved hypothetical protein [Source:VB External Description;Acc:AAEL007967]	FBgn0028545
AAEL007970	conserved hypothetical protein [Source:VB External Description;Acc:AAEL007970]	no homolog
AAEL007980	hypothetical protein [Source:VB External Description;Acc:AAEL007980]	no homolog
AAEL008015	hypothetical protein [Source:VB External Description;Acc:AAEL008015]	FBgn0052676	lateral inhibition ; GO:0046331 | inferred from mutant phenotype <newline> cellular process ; GO:0009987 | inferred from mutant phenotype	-	-
AAEL008036	dynein heavy chain [Source:VB External Description;Acc:AAEL008036]	FBgn0035581	microtubule-based movement ; GO:0007018 | inferred from sequence or structural similarity <newline> microtubule-based movement ; GO:0007018 | inferred from electronic annotation with InterPro:IPR004273	microtubule associated complex ; GO:0005875 | inferred from sequence or structural similarity with SGD_LOCUS:DYN1; SGD:S0001762 <newline> dynein complex ; GO:0030286 | inferred from sequence or structural similarity <newline> dynein complex ; GO:0030286 | inferred from electronic annotation with InterPro:IPR004273	motor activity ; GO:0003774 | inferred from sequence or structural similarity with SGD_LOCUS:DYN1; SGD:S0001762 <newline> ATPase activity, coupled ; GO:0042623 | inferred from sequence or structural similarity <newline> nucleotide binding ; GO:0000166 | inferred from electronic annotation with InterPro:IPR003593 <newline> microtubule motor activity ; GO:0003777 | inferred from electronic annotati…
AAEL008053	pickpocket [Source:VB External Description;Acc:AAEL008053]	no homolog
AAEL008076	PIWI [Source:VB External Description;Acc:AAEL008076]	FBgn0004872	female germ-line stem cell division ; GO:0048132 | inferred from mutant phenotype <newline> male germ-line stem cell division ; GO:0048133 | inferred from mutant phenotype <newline> stem cell division ; GO:0017145 | inferred from mutant phenotype <newline> chromatin silencing ; GO:0006342 | inferred from mutant phenotype <newline> posttranscriptional gene silencing ; GO:0016441 | inferred from mu…	nucleus ; GO:0005634 | inferred from direct assay <newline> cytoplasm ; GO:0005737 | non-traceable author statement <newline> nucleoplasm ; GO:0005654 | non-traceable author statement <newline> nucleoplasm ; GO:0005654 | traceable author statement <newline> nucleus ; GO:0005634 | traceable author statement <newline> polytene chromosome ; GO:0005700 | inferred from direct assay <newline> euchromat…	RNA binding ; GO:0003723 | inferred from direct assay <newline> mRNA binding ; GO:0003729 | non-traceable author statement <newline> protein binding ; GO:0005515 | inferred from physical interaction with Dcr-1 inferred from physical interaction with Fmr1 inferred from physical interaction with vas
AAEL008104	fibrinogen and fibronectin [Source:VB External Description;Acc:AAEL008104]	FBgn0036929	lateral inhibition ; GO:0046331 | inferred from mutant phenotype <newline> signal transduction ; GO:0007165 | inferred from electronic annotation with InterPro:IPR002181, InterPro:IPR014715, InterPro:IPR014716	-	receptor binding ; GO:0005102 | inferred from electronic annotation with InterPro:IPR002181, InterPro:IPR014715, InterPro:IPR014716
AAEL008129	conserved hypothetical protein [Source:VB External Description;Acc:AAEL008129]	FBgn0039411	regulation of transcription, DNA-dependent ; GO:0006355 | inferred from sequence or structural similarity with ss <newline> open tracheal system development ; GO:0007424 | inferred from mutant phenotype <newline> branch fusion, open tracheal system ; GO:0035147 | inferred from expression pattern AND inferred from mutant phenotype inferred from mutant phenotype <newline> open tracheal system devel…	nucleus ; GO:0005634 | inferred by curator from GO:0003700 <newline> nucleus ; GO:0005634 | inferred from direct assay <newline> protein complex ; GO:0043234 | inferred from physical interaction with tgo <newline> nucleus ; GO:0005634 | inferred by curator from GO:0043565|GO:0003700	sequence-specific DNA binding transcription factor activity ; GO:0003700 | inferred from sequence or structural similarity with ss <newline> protein heterodimerization activity ; GO:0046982 | traceable author statement <newline> sequence-specific DNA binding ; GO:0043565 | contributes_to inferred from direct assay <newline> protein heterodimerization activity ; GO:0046982 | inferred from physical…
AAEL008141	period circadian protein [Source:VB External Description;Acc:AAEL008141]	FBgn0003068	mating behavior ; GO:0007617 | inferred from mutant phenotype <newline> circadian rhythm ; GO:0007623 | inferred from mutant phenotype <newline> entrainment of circadian clock ; GO:0009649 | inferred from mutant phenotype <newline> circadian rhythm ; GO:0007623 | non-traceable author statement <newline> ultradian rhythm ; GO:0007624 | non-traceable author statement <newline> male courtship behavi…	cytoplasm ; GO:0005737 | inferred from direct assay <newline> nucleus ; GO:0005634 | inferred from direct assay <newline> nucleus ; GO:0005634 | non-traceable author statement <newline> cytoplasm ; GO:0005737 | non-traceable author statement <newline> nucleus ; GO:0005634 | traceable author statement <newline> cytoplasm ; GO:0005737 | traceable author statement	transcription cofactor activity ; GO:0003712 | non-traceable author statement <newline> transcription corepressor activity ; GO:0003714 | traceable author statement <newline> protein heterodimerization activity ; GO:0046982 | traceable author statement <newline> protein heterodimerization activity ; GO:0046982 | non-traceable author statement <newline> protein binding ; GO:0005515 | inferred from…
AAEL008187	hypothetical protein [Source:VB External Description;Acc:AAEL008187]	no homolog
AAEL008190	bhlh factor math6 (atoh8 protein) (bhlh transcription factor) [Source:VB External Description;Acc:AAEL008190]	FBgn0002931	imaginal disc-derived wing vein morphogenesis ; GO:0008586 | traceable author statement <newline> regulation of transcription, DNA-dependent ; GO:0006355 | inferred from sequence or structural similarity with HLH54F	nucleus ; GO:0005634 | non-traceable author statement	sequence-specific DNA binding transcription factor activity ; GO:0003700 | inferred from sequence or structural similarity with HLH54F
AAEL008197	serine collagenase 1 precursor, putative [Source:VB External Description;Acc:AAEL008197]	FBgn0035670	proteolysis ; GO:0006508 | non-traceable author statement <newline> proteolysis ; GO:0006508 | inferred from electronic annotation with InterPro:IPR001254, InterPro:IPR001314, InterPro:IPR018114	-	serine-type endopeptidase activity ; GO:0004252 | non-traceable author statement <newline> serine-type endopeptidase activity ; GO:0004252 | inferred from electronic annotation with InterPro:IPR001254, InterPro:IPR001314, InterPro:IPR018114
AAEL008202	serine-type enodpeptidase, [Source:VB External Description;Acc:AAEL008202]	FBgn0035663	proteolysis ; GO:0006508 | non-traceable author statement <newline> proteolysis ; GO:0006508 | inferred from electronic annotation with InterPro:IPR001254, InterPro:IPR001314, InterPro:IPR018114	-	serine-type endopeptidase activity ; GO:0004252 | non-traceable author statement <newline> serine-type endopeptidase activity ; GO:0004252 | inferred from electronic annotation with InterPro:IPR001254, InterPro:IPR001314, InterPro:IPR018114
AAEL008318	cadherin, putative [Source:VB External Description;Acc:AAEL008318]	FBgn0038247	calcium-dependent cell-cell adhesion ; GO:0016339 | inferred from sequence or structural similarity <newline> open tracheal system development ; GO:0007424 | inferred from genetic interaction with shg <newline> homophilic cell adhesion ; GO:0007156 | inferred from electronic annotation with InterPro:IPR002126	integral to plasma membrane ; GO:0005887 | inferred from sequence or structural similarity <newline> plasma membrane ; GO:0005886 | inferred from electronic annotation with InterPro:IPR020894	calcium ion binding ; GO:0005509 | inferred from electronic annotation with InterPro:IPR002126, InterPro:IPR015919
AAEL008348	conserved hypothetical protein [Source:VB External Description;Acc:AAEL008348]	FBgn0030148	-	-	transferase activity, transferring acyl groups other than amino-acyl groups ; GO:0016747 | inferred from electronic annotation with InterPro:IPR002656
AAEL008366	pyruvate dehydrogenase [Source:VB External Description;Acc:AAEL008366]	FBgn0037709	fatty-acyl-CoA biosynthetic process ; GO:0046949 | inferred from sequence or structural similarity with UniProtKB:P12694	3-methyl-2-oxobutanoate dehydrogenase (lipoamide) complex ; GO:0017086 | inferred from sequence or structural similarity with UniProtKB:P11960 <newline> 3-methyl-2-oxobutanoate dehydrogenase (lipoamide) complex ; GO:0017086 | inferred from sequence or structural similarity with UniProtKB:P12694	3-methyl-2-oxobutanoate dehydrogenase (2-methylpropanoyl-transferring) activity ; GO:0003863 | inferred from sequence or structural similarity with UniProtKB:P11960 <newline> 3-methyl-2-oxobutanoate dehydrogenase (2-methylpropanoyl-transferring) activity ; GO:0003863 | inferred from sequence or structural similarity with UniProtKB:P12694
AAEL008369	acyl phosphatase, putative [Source:VB External Description;Acc:AAEL008369]	FBgn0040524	-	-	acylphosphatase activity ; GO:0003998 | inferred from electronic annotation with InterPro:IPR020456
AAEL008385	histone H2A, putative [Source:VB External Description;Acc:AAEL008385]	FBgn0053865	chromatin assembly or disassembly ; GO:0006333 | inferred from sequence or structural similarity with UniProtKB:P84051	nucleosome ; GO:0000786 | inferred from sequence or structural similarity with UniProtKB:P84051	DNA binding ; GO:0003677 | inferred from sequence or structural similarity with UniProtKB:P84051
AAEL008387	atrial natriuretic peptide receptor [Source:VB External Description;Acc:AAEL008387]	FBgn0036368	signal transduction ; GO:0007165 | inferred from sequence or structural similarity <newline> cGMP biosynthetic process ; GO:0006182 | inferred from electronic annotation with InterPro:IPR011645 <newline> protein phosphorylation ; GO:0006468 | inferred from electronic annotation with InterPro:IPR000719, InterPro:IPR001245 <newline> intracellular signal transduction ; GO:0035556 | inferred from ele…	plasma membrane ; GO:0005886 | inferred from sequence or structural similarity	guanylate cyclase activity ; GO:0004383 | inferred from sequence or structural similarity <newline> receptor activity ; GO:0004872 | inferred from sequence or structural similarity <newline> guanylate cyclase activity ; GO:0004383 | inferred from sequence or structural similarity with MGD:Npr1; MGI:MGI:97371 <newline> receptor activity ; GO:0004872 | inferred from sequence or structural similarit…
AAEL008398	conserved hypothetical protein [Source:VB External Description;Acc:AAEL008398]	FBgn0038816	synapse organization ; GO:0050808 | inferred from mutant phenotype <newline> small GTPase mediated signal transduction ; GO:0007264 | inferred from electronic annotation with InterPro:IPR001806, InterPro:IPR013684 <newline> protein phosphorylation ; GO:0006468 | inferred from electronic annotation with InterPro:IPR000719, InterPro:IPR008271, InterPro:IPR017442	intracellular ; GO:0005622 | inferred from electronic annotation with InterPro:IPR013684	protein kinase activity ; GO:0004672 | inferred from sequence or structural similarity with SGD_LOCUS:CDC15; SGD:S0000072 <newline> protein kinase activity ; GO:0004672 | inferred from direct assay <newline> protein serine/threonine kinase activity ; GO:0004674 | inferred from mutant phenotype <newline> GTP binding ; GO:0005525 | inferred from electronic annotation with InterPro:IPR001806, InterP…
AAEL008429	RP58 protein, putative [Source:VB External Description;Acc:AAEL008429]	no homolog
AAEL008484	steroid receptor-interacting snf2 domain protein [Source:VB External Description;Acc:AAEL008484]	FBgn0034976	DNA repair ; GO:0006281 | inferred from sequence or structural similarity with SGD_LOCUS:RAD54; SGD:S0003131	-	ATP binding ; GO:0005524 | inferred from electronic annotation with InterPro:IPR000330, InterPro:IPR001650 <newline> DNA binding ; GO:0003677 | inferred from electronic annotation with InterPro:IPR000330 <newline> helicase activity ; GO:0004386 | inferred from electronic annotation with InterPro:IPR001650
AAEL008490	NADH dehydrogenase, putative [Source:VB External Description;Acc:AAEL008490]	FBgn0030605	mitochondrial electron transport, NADH to ubiquinone ; GO:0006120 | inferred from sequence or structural similarity with UniProtKB:P17568	mitochondrial respiratory chain complex I ; GO:0005747 | inferred from sequence or structural similarity with UniProtKB:Q02368 <newline> mitochondrial respiratory chain complex I ; GO:0005747 | inferred from sequence or structural similarity with UniProtKB:P17568	NADH dehydrogenase (ubiquinone) activity ; GO:0008137 | inferred from sequence or structural similarity with UniProtKB:Q02368 <newline> NADH dehydrogenase activity ; GO:0003954 | inferred from sequence or structural similarity with UniProtKB:Q02368 <newline> NADH dehydrogenase activity ; GO:0003954 | inferred from sequence or structural similarity with UniProtKB:P17568
AAEL008521	conserved hypothetical protein [Source:VB External Description;Acc:AAEL008521]	FBgn0028475	-	plasma membrane ; GO:0005886 | inferred from sequence or structural similarity with UniProtKB:Q9Z2G6	binding ; GO:0005488 | inferred from electronic annotation with InterPro:IPR011990
AAEL008537	transcription factor grauzone, putative [Source:VB External Description;Acc:AAEL008537]	no homolog
AAEL008592	ribonuclease iii [Source:VB External Description;Acc:AAEL008592]	FBgn0026722	primary miRNA processing ; GO:0031053 | inferred from sequence or structural similarity with HGNC_gene:RNASEN; HGNC:17904; OMIM:608828 <newline> primary miRNA processing ; GO:0031053 | inferred from mutant phenotype <newline> neurogenesis ; GO:0022008 | inferred from mutant phenotype	nucleus ; GO:0005634 | inferred from sequence or structural similarity with HGNC_gene:RNASEN; HGNC:17904; OMIM:608828	ribonuclease III activity ; GO:0004525 | inferred from sequence or structural similarity with EMBL:AF116910; protein_id:AAD29637.1 <newline> ribonuclease III activity ; GO:0004525 | non-traceable author statement <newline> double-stranded RNA binding ; GO:0003725 | inferred from sequence or structural similarity <newline> double-stranded RNA binding ; GO:0003725 | inferred from electronic annotat…
AAEL008611	metastasis-associated protein 3 (mta3) [Source:VB External Description;Acc:AAEL008611]	FBgn0027951	phagocytosis, engulfment ; GO:0006911 | inferred from mutant phenotype <newline> regulation of transcription, DNA-dependent ; GO:0006355 | inferred from electronic annotation with InterPro:IPR000679	histone deacetylase complex ; GO:0000118 | inferred from direct assay	sequence-specific DNA binding ; GO:0043565 | inferred from electronic annotation with InterPro:IPR000679 <newline> zinc ion binding ; GO:0008270 | inferred from electronic annotation with InterPro:IPR000679, InterPro:IPR007087, InterPro:IPR015880 <newline> sequence-specific DNA binding transcription factor activity ; GO:0003700 | inferred from electronic annotation with InterPro:IPR000679
AAEL008623	conserved hypothetical protein [Source:VB External Description;Acc:AAEL008623]	FBgn0031454	methylation ; GO:0032259 | inferred from electronic annotation with InterPro:IPR002052	-	methyltransferase activity ; GO:0008168 | inferred from electronic annotation with InterPro:IPR002052, InterPro:IPR004557, InterPro:IPR007848 <newline> nucleic acid binding ; GO:0003676 | inferred from electronic annotation with InterPro:IPR002052
AAEL008625	ABC transporter [Source:VB External Description;Acc:AAEL008625]	FBgn0031515	transport ; GO:0006810 | inferred from sequence or structural similarity with UniProtKB:P45844	ATP-binding cassette (ABC) transporter complex ; GO:0043190 | inferred from sequence or structural similarity with UniProtKB:P45844 <newline> integral to membrane ; GO:0016021 | inferred from electronic annotation with InterPro:IPR020064	ATPase activity, coupled to transmembrane movement of substances ; GO:0042626 | inferred from sequence or structural similarity with UniProtKB:P45844 <newline> transporter activity ; GO:0005215 | inferred from sequence or structural similarity with UniProtKB:P45844 <newline> ATP binding ; GO:0005524 | inferred from electronic annotation with InterPro:IPR003439, InterPro:IPR020064
AAEL008644	conserved hypothetical protein [Source:VB External Description;Acc:AAEL008644]	no homolog
AAEL008744	hypothetical protein [Source:VB External Description;Acc:AAEL008744]	FBgn0030970	-	-	-
AAEL008757		FBgn0032132	-	-	carboxylesterase activity ; GO:0004091 | inferred from sequence or structural similarity with UniProtKB:P35502
AAEL008771	conserved hypothetical protein [Source:VB External Description;Acc:AAEL008771]	FBgn0035032	proton transport ; GO:0015992 | inferred from sequence or structural similarity with UniProtKB:P56134 <newline> lateral inhibition ; GO:0046331 | inferred from mutant phenotype	lipid particle ; GO:0005811 | inferred from direct assay <newline> mitochondrial proton-transporting ATP synthase complex, coupling factor F(o) ; GO:0000276 | inferred from sequence or structural similarity with UniProtKB:P56134	hydrogen-exporting ATPase activity, phosphorylative mechanism ; GO:0008553 | inferred from sequence or structural similarity with UniProtKB:P56135 <newline> hydrogen-exporting ATPase activity, phosphorylative mechanism ; GO:0008553 | inferred from sequence or structural similarity with UniProtKB:P56134
AAEL008814	hypothetical protein [Source:VB External Description;Acc:AAEL008814]	FBgn0020261	RNA catabolic process ; GO:0006401 | non-traceable author statement <newline> gastrulation ; GO:0007369 | non-traceable author statement <newline> nuclear-transcribed mRNA catabolic process, nonsense-mediated decay ; GO:0000184 | inferred from mutant phenotype <newline> RNA interference ; GO:0016246 | inferred from mutant phenotype <newline> nuclear-transcribed mRNA catabolic process, exonucleoly…	cytoplasm ; GO:0005737 | non-traceable author statement <newline> cytoplasmic mRNA processing body ; GO:0000932 | inferred from direct assay <newline> cytoplasm ; GO:0005737 | inferred from direct assay	5'-3' exoribonuclease activity ; GO:0004534 | inferred from sequence or structural similarity <newline> 5'-3' exoribonuclease activity ; GO:0004534 | inferred from direct assay <newline> nucleic acid binding ; GO:0003676 | inferred from electronic annotation with InterPro:IPR004859
AAEL008845	conserved hypothetical protein [Source:VB External Description;Acc:AAEL008845]	FBgn0032619
AAEL008884	hypothetical protein [Source:VB External Description;Acc:AAEL008884]	no homolog
AAEL008915	sodium-and chloride-activated ATP-sensitive potassium channel [Source:VB External Description;Acc:AAEL008915]	FBgn0085392
AAEL008927	hypothetical protein [Source:VB External Description;Acc:AAEL008927]	no homolog
AAEL008930	protein phosphatase-2b [Source:VB External Description;Acc:AAEL008930]	FBgn0030758	protein dephosphorylation ; GO:0006470 | non-traceable author statement <newline> positive regulation of NFAT protein import into nucleus ; GO:0051533 | inferred from mutant phenotype	cellular_component ; GO:0005575 | no biological data available	protein serine/threonine phosphatase activity ; GO:0004722 | inferred from sequence or structural similarity <newline> protein serine/threonine phosphatase activity ; GO:0004722 | non-traceable author statement <newline> protein serine/threonine phosphatase activity ; GO:0004722 | inferred from sequence or structural similarity with EMBL:X57115; protein_id:CAA40398.2
AAEL008933	3-hydroxyisobutyrate dehydrogenase [Source:VB External Description;Acc:AAEL008933]	FBgn0043456	pentose-phosphate shunt ; GO:0006098 | inferred from electronic annotation with InterPro:IPR006115	cellular_component ; GO:0005575 | no biological data available	3-hydroxyisobutyrate dehydrogenase activity ; GO:0008442 | inferred from sequence or structural similarity with EMBL:AE000670 <newline> coenzyme binding ; GO:0050662 | inferred from electronic annotation with InterPro:IPR013328 <newline> phosphogluconate dehydrogenase (decarboxylating) activity ; GO:0004616 | inferred from electronic annotation with InterPro:IPR006115 <newline> nucleotide binding…
AAEL008949	hypothetical protein [Source:VB External Description;Acc:AAEL008949]	FBgn0027279	-	-	acid phosphatase activity ; GO:0003993 | inferred from electronic annotation with InterPro:IPR000560
AAEL008950	conserved hypothetical protein [Source:VB External Description;Acc:AAEL008950]	FBgn0027279	-	-	acid phosphatase activity ; GO:0003993 | inferred from electronic annotation with InterPro:IPR000560
AAEL008954	conserved hypothetical protein [Source:VB External Description;Acc:AAEL008954]	FBgn0039692
AAEL008956	conserved hypothetical protein [Source:VB External Description;Acc:AAEL008956]	FBgn0039136	biological_process ; GO:0008150 | no biological data available	cellular_component ; GO:0005575 | no biological data available	molecular_function ; GO:0003674 | no biological data available
AAEL008958	forkhead box protein (AaegFOXK1) [Source:VB External Description;Acc:AAEL008958]	FBgn0036134	regulation of transcription, DNA-dependent ; GO:0006355 | inferred from electronic annotation with InterPro:IPR001766, InterPro:IPR018122	nucleus ; GO:0005634 | inferred from direct assay <newline> nucleus ; GO:0005634 | inferred from sequence or structural similarity with MGD:Foxk1; MGI:MGI:1347488	sequence-specific DNA binding transcription factor activity ; GO:0003700 | inferred from direct assay <newline> sequence-specific DNA binding transcription factor activity ; GO:0003700 | inferred from sequence or structural similarity with MGD:Foxk1; MGI:MGI:1347488 <newline> sequence-specific DNA binding ; GO:0043565 | inferred from electronic annotation with InterPro:IPR001766, InterPro:IPR0181…
AAEL008960	Regulator of telomere elongation helicase 1 homolog (EC 3.6.4.12) [Source:VB External Description;Acc:AAEL008960]	FBgn0029798	nucleotide-excision repair ; GO:0006289 | inferred from sequence or structural similarity with UniProtKB:O08811	-	ATP-dependent DNA helicase activity ; GO:0004003 | inferred from sequence or structural similarity with UniProtKB:O08811 <newline> ATP binding ; GO:0005524 | inferred from electronic annotation with InterPro:IPR006555, InterPro:IPR010614 <newline> DNA binding ; GO:0003677 | inferred from electronic annotation with InterPro:IPR010614
AAEL008961	hypothetical protein [Source:VB External Description;Acc:AAEL008961]	FBgn0004893	hindgut morphogenesis ; GO:0007442 | inferred from mutant phenotype <newline> imaginal disc-derived leg joint morphogenesis ; GO:0016348 | inferred from mutant phenotype <newline> imaginal disc-derived leg morphogenesis ; GO:0007480 | inferred from mutant phenotype <newline> wing disc development ; GO:0035220 | inferred from mutant phenotype <newline> lateral inhibition ; GO:0046331 | inferred fr…	nucleus ; GO:0005634 | inferred from sequence or structural similarity with odd	zinc ion binding ; GO:0008270 | inferred from electronic annotation with InterPro:IPR007087, InterPro:IPR015880 <newline> nucleic acid binding ; GO:0003676 | inferred from electronic annotation with InterPro:IPR013087
AAEL008983	adult cuticle protein, putative [Source:VB External Description;Acc:AAEL008983]	no homolog
AAEL009027	Mediator of RNA polymerase II transcription subunit 24 (Mediator complex subunit 24) [Source:VB External Description;Acc:AAEL009027]	FBgn0035851	transcription initiation from RNA polymerase II promoter ; GO:0006367 | inferred from sequence or structural similarity <newline> transcription from RNA polymerase II promoter ; GO:0006366 | inferred from sequence or structural similarity with EMBL:AF055995 <newline> muscle organ development ; GO:0007517 | inferred from mutant phenotype <newline> dendrite morphogenesis ; GO:0048813 | inferred fro…	nucleus ; GO:0005634 | inferred from sequence or structural similarity with EMBL:AF055995 <newline> mediator complex ; GO:0016592 | inferred from sequence or structural similarity <newline> mediator complex ; GO:0016592 | inferred from sequence or structural similarity with EMBL:AF055995	RNA polymerase II transcription cofactor activity ; GO:0001104 | inferred from sequence or structural similarity <newline> RNA polymerase II transcription cofactor activity ; GO:0001104 | inferred from sequence or structural similarity with EMBL:AF055995
AAEL009036	hypothetical protein [Source:VB External Description;Acc:AAEL009036]	no homolog
AAEL009073	lupus la ribonucleoprotein [Source:VB External Description;Acc:AAEL009073]	FBgn0040108
AAEL009091	hypothetical protein [Source:VB External Description;Acc:AAEL009091]	no homolog
AAEL009142	prolyl endopeptidase (prolyl oligopeptidase) [Source:VB External Description;Acc:AAEL009142]	FBgn0032242	proteolysis ; GO:0006508 | inferred from electronic annotation with InterPro:IPR001375, InterPro:IPR002470, InterPro:IPR002471, InterPro:IPR004106	-	serine-type endopeptidase activity ; GO:0004252 | inferred from sequence or structural similarity with NCBI_gi:4506043 <newline> serine-type exopeptidase activity ; GO:0070008 | inferred from electronic annotation with InterPro:IPR023302
AAEL009172	ubiquitin ligase E3 alpha [Source:VB External Description;Acc:AAEL009172]	no homolog
AAEL009180	GTP-binding protein rit [Source:VB External Description;Acc:AAEL009180]	FBgn0017549	small GTPase mediated signal transduction ; GO:0007264 | inferred from electronic annotation with InterPro:IPR001806 <newline> GTP catabolic process ; GO:0006184 | inferred from electronic annotation with InterPro:IPR020849	plasma membrane ; GO:0005886 | inferred from sequence or structural similarity with UniProtKB:Q99578	GTP binding ; GO:0005525 | inferred from sequence or structural similarity with UniProtKB:Q99578 <newline> calmodulin binding ; GO:0005516 | inferred from sequence or structural similarity with UniProtKB:Q99578 <newline> calmodulin binding ; GO:0005516 | non-traceable author statement <newline> calmodulin binding ; GO:0005516 | traceable author statement <newline> calmodulin binding ; GO:0005516 …
AAEL009192	class A scavenger receptor (SRCR domain) with serine protease domain [Source:VB External Description;Acc:AAEL009192]	FBgn0023479	proteolysis ; GO:0006508 | non-traceable author statement <newline> long-term memory ; GO:0007616 | inferred from mutant phenotype <newline> chitin metabolic process ; GO:0006030 | inferred from electronic annotation with InterPro:IPR002557 <newline> proteolysis ; GO:0006508 | inferred from electronic annotation with InterPro:IPR001254, InterPro:IPR001314, InterPro:IPR018114	extracellular region ; GO:0005576 | inferred from electronic annotation with InterPro:IPR002557 <newline> membrane ; GO:0016020 | inferred from electronic annotation with InterPro:IPR001190, InterPro:IPR017448	serine-type endopeptidase activity ; GO:0004252 | inferred from sequence or structural similarity <newline> serine-type endopeptidase activity ; GO:0004252 | non-traceable author statement <newline> serine-type endopeptidase activity ; GO:0004252 | inferred from electronic annotation with InterPro:IPR001254, InterPro:IPR001314, InterPro:IPR018114 <newline> chitin binding ; GO:0008061 | inferred f…
AAEL009205	conserved hypothetical protein [Source:VB External Description;Acc:AAEL009205]	no homolog
AAEL009207	glucose dehydrogenase [Source:VB External Description;Acc:AAEL009207]	no homolog
AAEL009208	hypothetical protein [Source:VB External Description;Acc:AAEL009208]	no homolog
AAEL009260	conserved hypothetical protein [Source:VB External Description;Acc:AAEL009260]	no homolog
AAEL009269	conserved hypothetical protein [Source:VB External Description;Acc:AAEL009269]	FBgn0032798	-	microtubule associated complex ; GO:0005875 | inferred from direct assay	-
AAEL009289	eg:34f3.4 protein [Source:VB External Description;Acc:AAEL009289]	FBgn0025621	-	-	binding ; GO:0005488 | inferred from electronic annotation with InterPro:IPR011989, InterPro:IPR016024
AAEL009314	adenylate cyclase [Source:VB External Description;Acc:AAEL009314]	FBgn0030576	transmembrane transport ; GO:0055085 | inferred from electronic annotation with InterPro:IPR011701	integral to membrane ; GO:0016021 | inferred from electronic annotation with InterPro:IPR011701	-
AAEL009346	hypothetical protein [Source:VB External Description;Acc:AAEL009346]	FBgn0035338	-	-	-
AAEL009398	Pep12p, putative [Source:VB External Description;Acc:AAEL009398]	FBgn0036341	synaptic vesicle docking involved in exocytosis ; GO:0016081 | inferred from sequence or structural similarity <newline> neurotransmitter secretion ; GO:0007269 | inferred from sequence or structural similarity with EMBL:AF044581 <newline> vesicle-mediated transport ; GO:0016192 | inferred from sequence or structural similarity with EMBL:AF044581 <newline> cytokinesis after meiosis I ; GO:0007110…	plasma membrane ; GO:0005886 | inferred from sequence or structural similarity <newline> plasma membrane ; GO:0005886 | inferred from sequence or structural similarity with EMBL:AF044581	SNAP receptor activity ; GO:0005484 | inferred from sequence or structural similarity <newline> SNAP receptor activity ; GO:0005484 | inferred from sequence or structural similarity with EMBL:AF044581
AAEL009490	carbamoyl-phosphate synthase large chain [Source:VB External Description;Acc:AAEL009490]	FBgn0003189	'de novo' pyrimidine base biosynthetic process ; GO:0006207 | non-traceable author statement <newline> 'de novo' pyrimidine base biosynthetic process ; GO:0006207 | inferred from mutant phenotype <newline> glutamine metabolic process ; GO:0006541 | inferred by curator from GO:0004088 <newline> glutamine metabolic process ; GO:0006541 | inferred from mutant phenotype	cytoplasm ; GO:0005737 | non-traceable author statement	aspartate carbamoyltransferase activity ; GO:0004070 | inferred from sequence or structural similarity with NCBI_gi:4757896 <newline> carbamoyl-phosphate synthase (ammonia) activity ; GO:0004087 | inferred from sequence or structural similarity with NCBI_gi:4757896 <newline> dihydroorotase activity ; GO:0004151 | inferred from sequence or structural similarity with NCBI_gi:4757896 <newline> dihyd…
AAEL009517	lumican, putative [Source:VB External Description;Acc:AAEL009517]	FBgn0038120
AAEL009527	conserved hypothetical protein [Source:VB External Description;Acc:AAEL009527]	FBgn0036947	chitin metabolic process ; GO:0006030 | inferred from electronic annotation with InterPro:IPR002557	extracellular region ; GO:0005576 | inferred from electronic annotation with InterPro:IPR002557	structural constituent of peritrophic membrane ; GO:0016490 | inferred from sequence or structural similarity with EMBL:AF030431 <newline> chitin binding ; GO:0008061 | inferred from reviewed computational analysis <newline> chitin binding ; GO:0008061 | inferred from electronic annotation with InterPro:IPR002557
AAEL009543	conserved hypothetical protein [Source:VB External Description;Acc:AAEL009543]	FBgn0036947	chitin metabolic process ; GO:0006030 | inferred from electronic annotation with InterPro:IPR002557	extracellular region ; GO:0005576 | inferred from electronic annotation with InterPro:IPR002557	structural constituent of peritrophic membrane ; GO:0016490 | inferred from sequence or structural similarity with EMBL:AF030431 <newline> chitin binding ; GO:0008061 | inferred from reviewed computational analysis <newline> chitin binding ; GO:0008061 | inferred from electronic annotation with InterPro:IPR002557
AAEL009578	hypothetical protein [Source:VB External Description;Acc:AAEL009578]	no homolog
AAEL009592	hypothetical protein [Source:VB External Description;Acc:AAEL009592]	FBgn0033306
AAEL009613	mitochondrial ribosomal protein, L36, putative [Source:VB External Description;Acc:AAEL009613]	FBgn0042112	translation ; GO:0006412 | inferred from electronic annotation with InterPro:IPR000473	mitochondrial large ribosomal subunit ; GO:0005762 | inferred from sequence or structural similarity with UniProtKB:Q9P0M9	structural constituent of ribosome ; GO:0003735 | inferred from sequence or structural similarity with UniProtKB:Q9P0M9
AAEL009660	conserved hypothetical protein [Source:VB External Description;Acc:AAEL009660]	FBgn0036377	-	-	-
AAEL009699	hypothetical protein [Source:VB External Description;Acc:AAEL009699]	no homolog
AAEL009732	rac GTPase [Source:VB External Description;Acc:AAEL009732]	FBgn0010333	phagocytosis triggered by activation of immune response cell surface activating receptor ; GO:0002433 | inferred from direct assay <newline> JNK cascade ; GO:0007254 | traceable author statement <newline> dorsal closure ; GO:0007391 | traceable author statement <newline> ovarian follicle cell development ; GO:0030707 | traceable author statement <newline> actin cytoskeleton organization ; GO:0030…	rhabdomere ; GO:0016028 | inferred from direct assay <newline> intracellular ; GO:0005622 | inferred from electronic annotation with InterPro:IPR003578	GTPase activity ; GO:0003924 | inferred from sequence or structural similarity with SGD_LOCUS:CDC42; SGD:S0004219 <newline> GTPase activity ; GO:0003924 | non-traceable author statement <newline> GTPase activity ; GO:0003924 | traceable author statement <newline> GTPase activity ; GO:0003924 | inferred from sequence or structural similarity <newline> GTP binding ; GO:0005525 | inferred from elect…
AAEL009733	hypothetical protein [Source:VB External Description;Acc:AAEL009733]	no homolog
AAEL009742	Homeobox protein abdominal-A homolog [Source:VB External Description;Acc:AAEL009742]	FBgn0000014	peripheral nervous system development ; GO:0007422 | traceable author statement <newline> germ cell migration ; GO:0008354 | inferred from mutant phenotype <newline> gonadal mesoderm development ; GO:0007506 | inferred from mutant phenotype <newline> oenocyte development ; GO:0007438 | inferred from mutant phenotype <newline> heart development ; GO:0007507 | inferred from mutant phenotype <newlin…	nucleus ; GO:0005634 | non-traceable author statement <newline> nucleus ; GO:0005634 | inferred from electronic annotation with InterPro:IPR017970	sequence-specific enhancer binding RNA polymerase II transcription factor activity ; GO:0003705 | inferred from direct assay <newline> sequence-specific DNA binding transcription factor activity ; GO:0003700 | inferred from mutant phenotype <newline> sequence-specific DNA binding ; GO:0043565 | inferred from direct assay <newline> sequence-specific DNA binding transcription factor activity ; GO:0…
AAEL009783	cuticle protein, putative [Source:VB External Description;Acc:AAEL009783]	FBgn0038714	-	-	structural constituent of chitin-based larval cuticle ; GO:0008010 | inferred from sequence or structural similarity with UniProtKB:P80683 <newline> structural constituent of chitin-based cuticle ; GO:0005214 | inferred from sequence or structural similarity with Pfam:PF00379 inferred from sequence or structural similarity with InterPro:IPR000618
AAEL009784	cuticle protein, putative [Source:VB External Description;Acc:AAEL009784]	FBgn0035510	-	-	structural constituent of chitin-based larval cuticle ; GO:0008010 | inferred from sequence or structural similarity with UniProtKB:P80681 <newline> structural constituent of chitin-based cuticle ; GO:0005214 | inferred from sequence or structural similarity with Pfam:PF00379 inferred from sequence or structural similarity with InterPro:IPR000618
AAEL009788	cuticle protein, putative [Source:VB External Description;Acc:AAEL009788]	FBgn0038714	-	-	structural constituent of chitin-based larval cuticle ; GO:0008010 | inferred from sequence or structural similarity with UniProtKB:P80683 <newline> structural constituent of chitin-based cuticle ; GO:0005214 | inferred from sequence or structural similarity with Pfam:PF00379 inferred from sequence or structural similarity with InterPro:IPR000618
AAEL009800	cuticle protein, putative [Source:VB External Description;Acc:AAEL009800]	FBgn0035510	-	-	structural constituent of chitin-based larval cuticle ; GO:0008010 | inferred from sequence or structural similarity with UniProtKB:P80681 <newline> structural constituent of chitin-based cuticle ; GO:0005214 | inferred from sequence or structural similarity with Pfam:PF00379 inferred from sequence or structural similarity with InterPro:IPR000618
AAEL009815	myotubularin [Source:VB External Description;Acc:AAEL009815]	FBgn0030582	dephosphorylation ; GO:0016311 | inferred from electronic annotation with InterPro:IPR017906	-	phosphatase activity ; GO:0016791 | inferred from electronic annotation with InterPro:IPR017906
AAEL009821	hypothetical protein [Source:VB External Description;Acc:AAEL009821]	FBgn0029864	-	-	-
AAEL009847	microtubule-associated protein [Source:VB External Description;Acc:AAEL009847]	FBgn0085416
AAEL009872	alanine aminotransferase [Source:VB External Description;Acc:AAEL009872]	FBgn0030478	biosynthetic process ; GO:0009058 | inferred from electronic annotation with InterPro:IPR004839	-	L-alanine:2-oxoglutarate aminotransferase activity ; GO:0004021 | inferred from sequence or structural similarity with EMBL:U70732 <newline> pyridoxal phosphate binding ; GO:0030170 | inferred from electronic annotation with InterPro:IPR004839, InterPro:IPR015421, InterPro:IPR015422
AAEL009906	hypothetical protein [Source:VB External Description;Acc:AAEL009906]	no homolog
AAEL009928	shoc2 [Source:VB External Description;Acc:AAEL009928]	FBgn0038504	-	-	Ras GTPase binding ; GO:0017016 | inferred from sequence or structural similarity with EMBL:AF068921
AAEL009930	sec-23 interacting protein P125 [Source:VB External Description;Acc:AAEL009930]	FBgn0031990	-	-	phospholipase A1 activity ; GO:0008970 | inferred from sequence or structural similarity with EMBL:AF045022 <newline> metal ion binding ; GO:0046872 | inferred from electronic annotation with InterPro:IPR004177
AAEL009936	conserved hypothetical protein [Source:VB External Description;Acc:AAEL009936]	FBgn0037680	-	-	-
AAEL009943	sidestep protein [Source:VB External Description;Acc:AAEL009943]	no homolog
AAEL009949	homeotic antennapedia protein, putative [Source:VB External Description;Acc:AAEL009949]	FBgn0003339	segment specification ; GO:0007379 | non-traceable author statement <newline> sex comb development ; GO:0045498 | non-traceable author statement <newline> specification of segmental identity, labial segment ; GO:0007381 | traceable author statement <newline> sex comb development ; GO:0045498 | inferred from mutant phenotype <newline> regulation of transcription from RNA polymerase II promoter ; G…	nucleus ; GO:0005634 | inferred from sequence or structural similarity with UniProtKB:P10628 <newline> nucleus ; GO:0005634 | non-traceable author statement	sequence-specific DNA binding transcription factor activity ; GO:0003700 | inferred from sequence or structural similarity with UniProtKB:P10628 <newline> sequence-specific DNA binding transcription factor activity ; GO:0003700 | non-traceable author statement <newline> sequence-specific DNA binding ; GO:0043565 | inferred from direct assay
AAEL009969	axonemal dynein light chain [Source:VB External Description;Acc:AAEL009969]	FBgn0033687	microtubule-based movement ; GO:0007018 | inferred from sequence or structural similarity <newline> microtubule-based process ; GO:0007017 | inferred from electronic annotation with InterPro:IPR001372	dynein complex ; GO:0030286 | inferred from sequence or structural similarity <newline> microtubule associated complex ; GO:0005875 | inferred from electronic annotation with InterPro:IPR001372	ATPase activity, coupled ; GO:0042623 | inferred from sequence or structural similarity
AAEL009991	myosin iii [Source:VB External Description;Acc:AAEL009991]	no homolog
AAEL010013	WD-repeat protein [Source:VB External Description;Acc:AAEL010013]	FBgn0036733	RNA splicing ; GO:0008380 | inferred from sequence or structural similarity with EMBL:Z80215 <newline> nuclear mRNA splicing, via spliceosome ; GO:0000398 | inferred from sequence or structural similarity with NCBI_NP:004688 AND inferred from sequence or structural similarity with SGD_LOCUS:PRP4; SGD:S0006382 <newline> nuclear mRNA splicing, via spliceosome ; GO:0000398 | inferred by curator from…	U4 snRNP ; GO:0005687 | inferred from sequence or structural similarity with EMBL:Z80215 <newline> U6 snRNP ; GO:0005688 | inferred from sequence or structural similarity with EMBL:Z80215 <newline> small nuclear ribonucleoprotein complex ; GO:0030532 | inferred from sequence or structural similarity with NCBI_NP:004688 AND inferred from sequence or structural similarity with SGD_LOCUS:PRP4; SGD:S…	U4 snRNA binding ; GO:0030621 | inferred from direct assay <newline> U6 snRNA binding ; GO:0017070 | inferred from direct assay
AAEL010060	signal recognition particle 68 kda protein [Source:VB External Description;Acc:AAEL010060]	FBgn0035947	SRP-dependent cotranslational protein targeting to membrane ; GO:0006614 | inferred from sequence or structural similarity with EMBL:X53744; protein_id:CAA37773 <newline> SRP-dependent cotranslational protein targeting to membrane ; GO:0006614 | inferred from sequence or structural similarity	signal recognition particle, endoplasmic reticulum targeting ; GO:0005786 | inferred from sequence or structural similarity with EMBL:X53744; protein_id:CAA37773 <newline> signal recognition particle, endoplasmic reticulum targeting ; GO:0005786 | inferred from sequence or structural similarity	7S RNA binding ; GO:0008312 | inferred from sequence or structural similarity with EMBL:X53744; protein_id:CAA37773 <newline> mRNA binding ; GO:0003729 | inferred from sequence or structural similarity
AAEL010064	conserved hypothetical protein [Source:VB External Description;Acc:AAEL010064]	FBgn0037559
AAEL010108	sex-determining protein fem-1 [Source:VB External Description;Acc:AAEL010108]	FBgn0034542	-	cellular_component ; GO:0005575 | no biological data available	-
AAEL010112	conserved hypothetical protein [Source:VB External Description;Acc:AAEL010112]	FBgn0034543	biological_process ; GO:0008150 | no biological data available	cellular_component ; GO:0005575 | no biological data available	molecular_function ; GO:0003674 | no biological data available
AAEL010133	conserved hypothetical protein [Source:VB External Description;Acc:AAEL010133]	no homolog
AAEL010147	conserved hypothetical protein [Source:VB External Description;Acc:AAEL010147]	FBgn0031857	-	intracellular ; GO:0005622 | inferred from electronic annotation with InterPro:IPR001876	zinc ion binding ; GO:0008270 | inferred from electronic annotation with InterPro:IPR001841, InterPro:IPR001876, InterPro:IPR002867
AAEL010214	conserved hypothetical protein [Source:VB External Description;Acc:AAEL010214]	FBgn0036219	-	-	-
AAEL010221	GATA transcription factor (GATAd) [Source:VB External Description;Acc:AAEL010221]	FBgn0003117	blastoderm segmentation ; GO:0007350 | inferred from mutant phenotype <newline> dorsal closure ; GO:0007391 | traceable author statement <newline> cardioblast differentiation ; GO:0010002 | inferred from mutant phenotype <newline> pericardial cell differentiation ; GO:0007513 | inferred from mutant phenotype <newline> cardioblast cell fate determination ; GO:0007510 | inferred from mutant phenoty…	nucleus ; GO:0005634 | inferred from sequence or structural similarity	sequence-specific DNA binding transcription factor activity ; GO:0003700 | traceable author statement <newline> sequence-specific DNA binding transcription factor activity ; GO:0003700 | inferred from sequence or structural similarity <newline> RNA polymerase II transcription factor binding ; GO:0001085 | inferred from physical interaction with tup <newline> sequence-specific DNA binding ; GO:004…
AAEL010240	conserved hypothetical protein [Source:VB External Description;Acc:AAEL010240]	no homolog
AAEL010252	hypothetical protein [Source:VB External Description;Acc:AAEL010252]	FBgn0027287	protein targeting to Golgi ; GO:0000042 | inferred from electronic annotation with InterPro:IPR000237	cis-Golgi network ; GO:0005801 | inferred from direct assay	-
AAEL010259	hypothetical protein [Source:VB External Description;Acc:AAEL010259]	no homolog
AAEL010280	conserved hypothetical protein [Source:VB External Description;Acc:AAEL010280]	FBgn0032904	triglyceride metabolic process ; GO:0006641 | inferred from sequence or structural similarity with MGD:Mttp; MGI:MGI:106926 <newline> lipid transport ; GO:0006869 | inferred from electronic annotation with InterPro:IPR001747, InterPro:IPR011030, InterPro:IPR015816, InterPro:IPR015819	lipid particle ; GO:0005811 | inferred from direct assay	triglyceride binding ; GO:0017129 | inferred from sequence or structural similarity with UniProtKB:O08601 <newline> phosphatidylcholine transmembrane transporter activity ; GO:0008525 | inferred from direct assay
AAEL010283	conserved hypothetical protein [Source:VB External Description;Acc:AAEL010283]	FBgn0051935	regulation of GTPase activity ; GO:0043087 | inferred from sequence or structural similarity with UniProtKB:Q15042	soluble fraction ; GO:0005625 | inferred from sequence or structural similarity with UniProtKB:Q15042	Rab GTPase activator activity ; GO:0005097 | inferred from sequence or structural similarity with UniProtKB:Q15042 <newline> Rab GTPase binding ; GO:0017137 | inferred from sequence or structural similarity with UniProtKB:Q15042
AAEL010284	aliphatic nitrilase, putative [Source:VB External Description;Acc:AAEL010284]	FBgn0037513	pyrimidine base catabolic process ; GO:0006208 | inferred by curator from GO:0003837 <newline> 'de novo' pyrimidine base biosynthetic process ; GO:0006207 | inferred from genetic interaction with r	-	beta-ureidopropionase activity ; GO:0003837 | non-traceable author statement <newline> beta-ureidopropionase activity ; GO:0003837 | inferred from sequence or structural similarity with UniProtKB:Q03248 <newline> beta-ureidopropionase activity ; GO:0003837 | inferred from direct assay
AAEL010300	conserved hypothetical protein [Source:VB External Description;Acc:AAEL010300]	FBgn0032170	-	-	-
AAEL010311	conserved hypothetical protein [Source:VB External Description;Acc:AAEL010311]	FBgn0027529	-	-	-
AAEL010326	Phosphotriesterase-related protein (EC 3.1.-.-)(Parathion hydrolase-related protein) [Source:VB External Description;Acc:AAEL010326]	FBgn0037683	catabolic process ; GO:0009056 | inferred from electronic annotation with InterPro:IPR001559, InterPro:IPR017947	cellular_component ; GO:0005575 | no biological data available	aryldialkylphosphatase activity ; GO:0004063 | inferred from sequence or structural similarity with UniProtKB:Q96BW5 <newline> hydrolase activity ; GO:0016787 | non-traceable author statement <newline> zinc ion binding ; GO:0008270 | inferred from electronic annotation with InterPro:IPR001559, InterPro:IPR017947
AAEL010383	guanylate cyclase, putative [Source:VB External Description;Acc:AAEL010383]	FBgn0037028	actin filament organization ; GO:0007015 | inferred from mutant phenotype <newline> cell adhesion ; GO:0007155 | inferred from mutant phenotype <newline> regulation of cell shape ; GO:0008360 | inferred from mutant phenotype	-	guanylate cyclase activity ; GO:0004383 | non-traceable author statement
AAEL010394	hypothetical protein [Source:VB External Description;Acc:AAEL010394]	no homolog
AAEL010400	hypothetical protein [Source:VB External Description;Acc:AAEL010400]	no homolog
AAEL010402	DEAD box ATP-dependent RNA helicase [Source:VB External Description;Acc:AAEL010402]	FBgn0037549	-	-	helicase activity ; GO:0004386 | inferred from sequence or structural similarity <newline> ATP-dependent RNA helicase activity ; GO:0004004 | inferred from sequence or structural similarity with SGD_LOCUS:DBP2; SGD:S0005056 <newline> ATP binding ; GO:0005524 | inferred from electronic annotation with InterPro:IPR000629, InterPro:IPR001650, InterPro:IPR011545 <newline> RNA binding ; GO:0003723 | i…
AAEL010434	Vitellogenin-A1 Precursor (VG)(PVG1) [Contains Vitellin light chain(VL);Vitellin heavy chain(VH)] [Source:VB External Description;Acc:AAEL010434]	no homolog
AAEL010457	conserved hypothetical protein [Source:VB External Description;Acc:AAEL010457]	FBgn0034650	negative regulation of RNA polymerase II transcriptional preinitiation complex assembly ; GO:0017055 | non-traceable author statement	negative cofactor 2 complex ; GO:0017054 | non-traceable author statement <newline> intracellular ; GO:0005622 | inferred from electronic annotation with InterPro:IPR003958	sequence-specific DNA binding ; GO:0043565 | inferred from electronic annotation with InterPro:IPR003958
AAEL010461	conserved hypothetical protein [Source:VB External Description;Acc:AAEL010461]	FBgn0037019	peroxisome organization ; GO:0007031 | inferred from sequence or structural similarity with NCBI_gi:4758898 <newline> spermatocyte division ; GO:0048137 | inferred from mutant phenotype	-	-
AAEL010466	mitogen activated protein kinase kinase kinase 4, mapkkk4, mekk4 [Source:VB External Description;Acc:AAEL010466]	FBgn0024329	protein phosphorylation ; GO:0006468 | traceable author statement <newline> protein phosphorylation ; GO:0006468 | non-traceable author statement <newline> response to oxidative stress ; GO:0006979 | inferred from mutant phenotype <newline> mucosal immune response ; GO:0002385 | inferred from mutant phenotype <newline> positive regulation of cell size ; GO:0045793 | inferred from genetic interact…	-	MAP kinase kinase kinase activity ; GO:0004709 | traceable author statement <newline> receptor signaling protein serine/threonine kinase activity ; GO:0004702 | non-traceable author statement <newline> MAP kinase kinase kinase activity ; GO:0004709 | non-traceable author statement <newline> MAP kinase kinase kinase activity ; GO:0004709 | inferred from direct assay <newline> mitogen-activated pro…
AAEL010482	acidic membrane protein of rat brain, putative [Source:VB External Description;Acc:AAEL010482]	FBgn0038476	nucleus organization ; GO:0006997 | inferred from mutant phenotype <newline> morphogenesis of embryonic epithelium ; GO:0016331 | inferred from mutant phenotype <newline> cellularization ; GO:0007349 | inferred from mutant phenotype	nuclear inner membrane ; GO:0005637 | inferred from direct assay <newline> lipid particle ; GO:0005811 | inferred from direct assay	-
AAEL010502	transcriptional regulator ATRX (X-linked helicase II) [Source:VB External Description;Acc:AAEL010502]	no homolog
AAEL010508	vacuolar protein sorting-associated protein (vps13) [Source:VB External Description;Acc:AAEL010508]	FBgn0033194	protein targeting to vacuole ; GO:0006623 | inferred from sequence or structural similarity with SGD_LOCUS:VPS13; SGD:S0003963	-	-
AAEL010520	conserved hypothetical protein [Source:VB External Description;Acc:AAEL010520]	FBgn0033482	-	-	carbohydrate binding ; GO:0030246 | inferred from electronic annotation with InterPro:IPR013784 <newline> carboxypeptidase activity ; GO:0004180 | inferred from electronic annotation with InterPro:IPR014766
AAEL010554	hypothetical protein [Source:VB External Description;Acc:AAEL010554]	no homolog
AAEL010560	forkhead box protein (AaegFOXK2) [Source:VB External Description;Acc:AAEL010560]	no homolog
AAEL010591	glutathionetransferase [Source:VB External Description;Acc:AAEL010591]	no homolog
AAEL010637	zinc finger protein, putative [Source:VB External Description;Acc:AAEL010637]	FBgn0051388	-	nucleus ; GO:0005634 | inferred from sequence or structural similarity with InterPro:IPR007087	nucleic acid binding ; GO:0003676 | inferred from sequence or structural similarity with InterPro:IPR007087 <newline> zinc ion binding ; GO:0008270 | inferred from electronic annotation with InterPro:IPR007087, InterPro:IPR012934, InterPro:IPR015880
AAEL010642	poly(A)-binding protein, putative [Source:VB External Description;Acc:AAEL010642]	FBgn0037342	nuclear mRNA splicing, via spliceosome ; GO:0000398 | inferred by curator from GO:0071011|GO:0071013 <newline> neurogenesis ; GO:0022008 | inferred from mutant phenotype	precatalytic spliceosome ; GO:0071011 | inferred from direct assay <newline> catalytic step 2 spliceosome ; GO:0071013 | inferred from direct assay	mRNA binding ; GO:0003729 | inferred from sequence or structural similarity <newline> nucleic acid binding ; GO:0003676 | inferred from electronic annotation with InterPro:IPR000504 <newline> nucleotide binding ; GO:0000166 | inferred from electronic annotation with InterPro:IPR012677
AAEL010682	armc4 [Source:VB External Description;Acc:AAEL010682]	FBgn0031905	biological_process ; GO:0008150 | no biological data available	cellular_component ; GO:0005575 | no biological data available	binding ; GO:0005488 | inferred from electronic annotation with InterPro:IPR011989, InterPro:IPR016024
AAEL010745	four-jointed protein, putative [Source:VB External Description;Acc:AAEL010745]	FBgn0000658	cell-cell signaling ; GO:0007267 | inferred from direct assay AND inferred from sequence or structural similarity <newline> imaginal disc growth ; GO:0007446 | inferred from mutant phenotype <newline> cell-cell signaling ; GO:0007267 | inferred from expression pattern AND inferred from mutant phenotype <newline> imaginal disc-derived wing vein specification ; GO:0007474 | inferred from mutant phe…	plasma membrane ; GO:0005886 | inferred from direct assay AND inferred from sequence or structural similarity <newline> plasma membrane ; GO:0005886 | inferred from sequence or structural similarity <newline> plasma membrane ; GO:0005886 | non-traceable author statement <newline> integral to membrane ; GO:0016021 | non-traceable author statement	protein kinase activity ; GO:0004672 | inferred from direct assay <newline> Wnt-protein binding ; GO:0017147 | inferred from physical interaction with Wnt4
AAEL010827	programmed cell death protein 11 (pre-rRNA processing protein rrp5) [Source:VB External Description;Acc:AAEL010827]	FBgn0039182	rRNA processing ; GO:0006364 | inferred from sequence or structural similarity with SGD_LOCUS:RRP5; SGD:S0004842 <newline> regulation of alternative nuclear mRNA splicing, via spliceosome ; GO:0000381 | inferred from mutant phenotype	nucleolus ; GO:0005730 | inferred from sequence or structural similarity with SGD_LOCUS:RRP5; SGD:S0004842 <newline> nucleus ; GO:0005634 | inferred by curator from GO:0000381	mRNA binding ; GO:0003729 | inferred from sequence or structural similarity with SGD_LOCUS:RRP5; SGD:S0004842
AAEL010829	protein arginine n-methyltransferase [Source:VB External Description;Acc:AAEL010829]	FBgn0038306	protein methylation ; GO:0006479 | inferred from electronic annotation with InterPro:IPR010456	cytoplasm ; GO:0005737 | inferred from electronic annotation with InterPro:IPR010456	protein-arginine N-methyltransferase activity ; GO:0016274 | inferred from sequence or structural similarity with EMBL:AF059530
AAEL010850	troponin i [Source:VB External Description;Acc:AAEL010850]	FBgn0004028	myofibril assembly ; GO:0030239 | inferred from mutant phenotype <newline> sarcomere organization ; GO:0045214 | inferred from mutant phenotype <newline> muscle organ development ; GO:0007517 | non-traceable author statement <newline> nervous system development ; GO:0007399 | non-traceable author statement <newline> cardiac muscle tissue development ; GO:0048738 | inferred from mutant phenotype <…	troponin complex ; GO:0005861 | non-traceable author statement <newline> nucleus ; GO:0005634 | colocalizes_with inferred from direct assay	actin binding ; GO:0003779 | non-traceable author statement <newline> tropomyosin binding ; GO:0005523 | non-traceable author statement
AAEL010867	serine protease [Source:VB External Description;Acc:AAEL010867]	FBgn0003450	dorsal/ventral axis specification ; GO:0009950 | non-traceable author statement <newline> Toll signaling pathway ; GO:0008063 | traceable author statement <newline> maternal specification of dorsal/ventral axis, oocyte, germ-line encoded ; GO:0007311 | traceable author statement <newline> protein processing ; GO:0016485 | inferred from genetic interaction with ea <newline> proteolysis ; GO:000650…	extracellular region ; GO:0005576 | traceable author statement	serine-type endopeptidase activity ; GO:0004252 | inferred from sequence or structural similarity with EMBL:AF053921; protein_id:AAD21841.1 <newline> serine-type peptidase activity ; GO:0008236 | non-traceable author statement <newline> serine-type endopeptidase activity ; GO:0004252 | non-traceable author statement <newline> peptidase activity ; GO:0008233 | traceable author statement
AAEL010887	hypothetical protein [Source:VB External Description;Acc:AAEL010887]	no homolog
AAEL010897	hypothetical protein [Source:VB External Description;Acc:AAEL010897]	no homolog
AAEL010908	hypothetical protein [Source:VB External Description;Acc:AAEL010908]	FBgn0010113	negative regulation of terminal cell fate specification, open tracheal system ; GO:0035155 | traceable author statement <newline> terminal branching, open tracheal system ; GO:0007430 | non-traceable author statement <newline> cell differentiation ; GO:0030154 | non-traceable author statement <newline> open tracheal system development ; GO:0007424 | non-traceable author statement <newline> termin…	cytoplasm ; GO:0005737 | inferred from direct assay <newline> cytoplasm ; GO:0005737 | non-traceable author statement <newline> cytoplasm ; GO:0005737 | traceable author statement	molecular_function ; GO:0003674 | no biological data available
AAEL010934	hypothetical protein [Source:VB External Description;Acc:AAEL010934]	no homolog
AAEL010941	conserved hypothetical protein [Source:VB External Description;Acc:AAEL010941]	FBgn0015558	biological_process ; GO:0008150 | no biological data available	-	-
AAEL010953	Protein OPI10 homolog [Source:VB External Description;Acc:AAEL010953]	FBgn0035243	biological_process ; GO:0008150 | no biological data available	cellular_component ; GO:0005575 | no biological data available	molecular_function ; GO:0003674 | no biological data available
AAEL010965	cubulin [Source:VB External Description;Acc:AAEL010965]	FBgn0052702	-	-	calcium ion binding ; GO:0005509 | inferred from electronic annotation with InterPro:IPR001881, InterPro:IPR018097
AAEL010994	hypothetical protein [Source:VB External Description;Acc:AAEL010994]	FBgn0061354
AAEL011040	dihydropyridine-sensitive l-type calcium channel [Source:VB External Description;Acc:AAEL011040]	FBgn0028859
AAEL011055	chaperone protein DNAj [Source:VB External Description;Acc:AAEL011055]	FBgn0002174	smoothened signaling pathway ; GO:0007224 | inferred from genetic interaction with ptc AND inferred from physical interaction with ptc <newline> protein folding ; GO:0006457 | inferred from electronic annotation with InterPro:IPR001305, InterPro:IPR002939, InterPro:IPR003095, InterPro:IPR008971, InterPro:IPR012724 <newline> response to heat ; GO:0009408 | inferred from electronic annotation with …	cytosol ; GO:0005829 | inferred from direct assay <newline> mitochondrion ; GO:0005739 | inferred from direct assay <newline> mitochondrion ; GO:0005739 | inferred from direct assay AND inferred from sequence or structural similarity	patched binding ; GO:0005113 | inferred from physical interaction with ptc <newline> ATP binding ; GO:0005524 | inferred from electronic annotation with InterPro:IPR012724 <newline> unfolded protein binding ; GO:0051082 | inferred from electronic annotation with InterPro:IPR001305, InterPro:IPR002939, InterPro:IPR003095, InterPro:IPR008971, InterPro:IPR012724 <newline> heat shock protein binding …
AAEL011056	transcription factor HES-1 (Hairy and enhancer of split 1), putative [Source:VB External Description;Acc:AAEL011056]	FBgn0032741	negative regulation of transcription from RNA polymerase II promoter ; GO:0000122 | inferred from sequence or structural similarity with MGD:Hes1; MGI:MGI:104853 <newline> regulation of transcription, DNA-dependent ; GO:0006355 | inferred from sequence or structural similarity with H	nucleus ; GO:0005634 | inferred by curator from GO:0003677	DNA binding ; GO:0003677 | inferred from sequence or structural similarity with MGD:Hes1; MGI:MGI:104853
AAEL011112	alcohol dehydrogenase [Source:VB External Description;Acc:AAEL011112]	FBgn0022359	oxidation-reduction process ; GO:0055114 | inferred from electronic annotation with InterPro:IPR002085, InterPro:IPR002328, InterPro:IPR013149, InterPro:IPR013154	-	L-iditol 2-dehydrogenase activity ; GO:0003939 | traceable author statement <newline> L-iditol 2-dehydrogenase activity ; GO:0003939 | inferred from sequence or structural similarity with UniProtKB:Q64442 <newline> zinc ion binding ; GO:0008270 | inferred from electronic annotation with InterPro:IPR002085, InterPro:IPR002328, InterPro:IPR013149 <newline> nucleotide binding ; GO:0000166 | inferred…
AAEL011116	14-3-3 protein sigma, gamma, zeta, beta/alpha [Source:VB External Description;Acc:AAEL011116]	FBgn0020238	Ras protein signal transduction ; GO:0007265 | non-traceable author statement <newline> imaginal disc development ; GO:0007444 | traceable author statement <newline> mitotic cell cycle checkpoint ; GO:0007093 | traceable author statement <newline> response to radiation ; GO:0009314 | traceable author statement <newline> DNA damage checkpoint ; GO:0000077 | inferred from mutant phenotype <newline>…	chromosome ; GO:0005694 | inferred from direct assay <newline> cytoplasm ; GO:0005737 | inferred from direct assay <newline> nucleus ; GO:0005634 | inferred from direct assay <newline> germline ring canal ; GO:0045172 | inferred from direct assay <newline> microtubule associated complex ; GO:0005875 | inferred from direct assay	protein kinase C inhibitor activity ; GO:0008426 | non-traceable author statement <newline> protein heterodimerization activity ; GO:0046982 | inferred from physical interaction with 14-3-3Î¶ <newline> protein domain specific binding ; GO:0019904 | inferred from electronic annotation with InterPro:IPR000308
AAEL011119	hypothetical protein [Source:VB External Description;Acc:AAEL011119]	no homolog
AAEL011133	hypothetical protein [Source:VB External Description;Acc:AAEL011133]	FBgn0010877	-	-	-
AAEL011306	conserved hypothetical protein [Source:VB External Description;Acc:AAEL011306]	FBgn0038735	-	-	calcium ion binding ; GO:0005509 | inferred from electronic annotation with InterPro:IPR002048, InterPro:IPR011992
AAEL011348	hypothetical protein [Source:VB External Description;Acc:AAEL011348]	no homolog
AAEL011354	zinc finger protein [Source:VB External Description;Acc:AAEL011354]	no homolog
AAEL011385	hypothetical protein [Source:VB External Description;Acc:AAEL011385]	FBgn0032389
AAEL011458	hypothetical protein [Source:VB External Description;Acc:AAEL011458]	FBgn0036617	-	-	structural constituent of chitin-based cuticle ; GO:0005214 | inferred from sequence or structural similarity with EMBL:AJ000044; protein_id:CAA03880 <newline> structural constituent of chitin-based cuticle ; GO:0005214 | inferred from sequence or structural similarity with Pfam:PF00379 inferred from sequence or structural similarity with InterPro:IPR000618
AAEL011465	conserved hypothetical protein [Source:VB External Description;Acc:AAEL011465]	FBgn0036191	determination of adult lifespan ; GO:0008340 | inferred from mutant phenotype <newline> transmembrane transport ; GO:0055085 | inferred from electronic annotation with InterPro:IPR011701	integral to membrane ; GO:0016021 | inferred from electronic annotation with InterPro:IPR011701	-
AAEL011500	Cdc42 protein, putative [Source:VB External Description;Acc:AAEL011500]	no homolog
AAEL011519	sucrose transport protein [Source:VB External Description;Acc:AAEL011519]	FBgn0035968	sucrose transport ; GO:0015770 | inferred from direct assay <newline> transmembrane transport ; GO:0055085 | inferred from electronic annotation with InterPro:IPR011701	apical part of cell ; GO:0045177 | inferred from direct assay <newline> cytoplasmic vesicle ; GO:0031410 | inferred from direct assay <newline> integral to membrane ; GO:0016021 | inferred from electronic annotation with InterPro:IPR011701	sucrose:hydrogen symporter activity ; GO:0008506 | inferred from sequence or structural similarity with EMBL:AC004138 <newline> sucrose transmembrane transporter activity ; GO:0008515 | inferred from direct assay
AAEL011524	conserved hypothetical protein [Source:VB External Description;Acc:AAEL011524]	FBgn0051368	nuclear mRNA splicing, via spliceosome ; GO:0000398 | inferred by curator from GO:0071011|GO:0071013	precatalytic spliceosome ; GO:0071011 | inferred from direct assay <newline> catalytic step 2 spliceosome ; GO:0071013 | inferred from direct assay	ATP-dependent helicase activity ; GO:0008026 | inferred from electronic annotation with InterPro:IPR011545 <newline> ATP binding ; GO:0005524 | inferred from electronic annotation with InterPro:IPR011545 <newline> nucleic acid binding ; GO:0003676 | inferred from electronic annotation with InterPro:IPR011545
AAEL011535	WD-repeat protein [Source:VB External Description;Acc:AAEL011535]	FBgn0013969
AAEL011536	phosphoglucomutase [Source:VB External Description;Acc:AAEL011536]	FBgn0036298	carbohydrate metabolic process ; GO:0005975 | inferred from electronic annotation with InterPro:IPR005843, InterPro:IPR005844, InterPro:IPR005845, InterPro:IPR005846, InterPro:IPR016055	-	phosphoacetylglucosamine mutase activity ; GO:0004610 | inferred from sequence or structural similarity with UniProtKB:P38628 <newline> magnesium ion binding ; GO:0000287 | inferred from electronic annotation with InterPro:IPR016066
AAEL011554	adhesion regulating molecule 1 (110 kda cell membrane glycoprotein) [Source:VB External Description;Acc:AAEL011554]	FBgn0033886	proteasome assembly ; GO:0043248 | inferred from sequence or structural similarity with UniProtKB:Q16186 <newline> lateral inhibition ; GO:0046331 | inferred from mutant phenotype	proteasome complex ; GO:0000502 | inferred from sequence or structural similarity with UniProtKB:Q16186 <newline> cytoplasm ; GO:0005737 | inferred from electronic annotation with InterPro:IPR006773 <newline> nucleus ; GO:0005634 | inferred from electronic annotation with InterPro:IPR006773	endopeptidase activator activity ; GO:0061133 | inferred from sequence or structural similarity with UniProtKB:Q16186
AAEL011577	A-kinase anchoring protein AKAP120, putative [Source:VB External Description;Acc:AAEL011577]	FBgn0022349	biological_process ; GO:0008150 | no biological data available	cellular_component ; GO:0005575 | no biological data available	molecular_function ; GO:0003674 | no biological data available
AAEL011596	mitotic checkpoint serine/threonine-protein kinase bub1 and bubr1 [Source:VB External Description;Acc:AAEL011596]	FBgn0025458	mitotic cell cycle spindle assembly checkpoint ; GO:0007094 | inferred from mutant phenotype <newline> mitotic cell cycle spindle assembly checkpoint ; GO:0007094 | inferred from sequence or structural similarity <newline> protein phosphorylation ; GO:0006468 | non-traceable author statement <newline> regulation of exit from mitosis ; GO:0007096 | inferred from genetic interaction with dup AND in…	kinetochore ; GO:0000776 | traceable author statement <newline> cytoplasm ; GO:0005737 | inferred from direct assay <newline> kinetochore ; GO:0000776 | inferred from direct assay <newline> condensed chromosome outer kinetochore ; GO:0000940 | non-traceable author statement	protein serine/threonine kinase activity ; GO:0004674 | inferred from sequence or structural similarity <newline> protein kinase activity ; GO:0004672 | non-traceable author statement <newline> protein serine/threonine kinase activity ; GO:0004674 | non-traceable author statement <newline> ATP binding ; GO:0005524 | inferred from electronic annotation with InterPro:IPR000719, InterPro:IPR017441, …
AAEL011617	conserved hypothetical protein [Source:VB External Description;Acc:AAEL011617]	FBgn0052333	-	-	-
AAEL011629	tyrosyl-DNA phosphodiesterase [Source:VB External Description;Acc:AAEL011629]	FBgn0031506
AAEL011649	DNA polymerase theta [Source:VB External Description;Acc:AAEL011649]	FBgn0002899	intracellular mRNA localization ; GO:0008298 | inferred from mutant phenotype <newline> karyosome formation ; GO:0030717 | inferred from mutant phenotype <newline> germarium-derived oocyte fate determination ; GO:0007294 | inferred from genetic interaction with spn-A <newline> polarity specification of anterior/posterior axis ; GO:0009949 | inferred from mutant phenotype <newline> polarity specif…	small nuclear ribonucleoprotein complex ; GO:0030532 | inferred from sequence or structural similarity with EMBL:Z70200; protein_id:CAA94089 <newline> U5 snRNP ; GO:0005682 | inferred from sequence or structural similarity with EMBL:Z70200; protein_id:CAA94089	helicase activity ; GO:0004386 | inferred from sequence or structural similarity <newline> ATP-dependent helicase activity ; GO:0008026 | inferred from electronic annotation with InterPro:IPR011545 <newline> ATP binding ; GO:0005524 | inferred from electronic annotation with InterPro:IPR001650, InterPro:IPR011545 <newline> nucleic acid binding ; GO:0003676 | inferred from electronic annotation wi…
AAEL011662	plasma glutamate carboxypeptidase [Source:VB External Description;Acc:AAEL011662]	no homolog
AAEL011699	hypothetical protein [Source:VB External Description;Acc:AAEL011699]	FBgn0041711	biological_process ; GO:0008150 | no biological data available	cellular_component ; GO:0005575 | no biological data available	molecular_function ; GO:0003674 | no biological data available
AAEL011709	diacylglycerol kinase, epsilon [Source:VB External Description;Acc:AAEL011709]	FBgn0020930	phosphorylation ; GO:0016310 | non-traceable author statement <newline> phosphorylation ; GO:0016310 | inferred from direct assay <newline> activation of protein kinase C activity by G-protein coupled receptor protein signaling pathway ; GO:0007205 | inferred from electronic annotation with InterPro:IPR000756, InterPro:IPR001206 <newline> intracellular signal transduction ; GO:0035556 | inferred …	-	diacylglycerol binding ; GO:0019992 | inferred from sequence or structural similarity with InterPro:IPR002219 <newline> diacylglycerol kinase activity ; GO:0004143 | inferred from sequence or structural similarity with UniProtKB:Q64398 <newline> diacylglycerol kinase activity ; GO:0004143 | non-traceable author statement <newline> diacylglycerol kinase activity ; GO:0004143 | inferred from direct…
AAEL011745	trisn small nuclear ribonucleoprotein, putative [Source:VB External Description;Acc:AAEL011745]	FBgn0036915	nuclear mRNA splicing, via spliceosome ; GO:0000398 | inferred from sequence or structural similarity with NCBI_gi:4758556 <newline> nuclear mRNA splicing, via spliceosome ; GO:0000398 | inferred from sequence or structural similarity with NCBI_NP:004689 AND inferred from sequence or structural similarity with SGD_LOCUS:PRP3; SGD:S0002881 <newline> nuclear mRNA splicing, via spliceosome ; GO:0000…	U4 snRNP ; GO:0005687 | inferred from sequence or structural similarity with NCBI_gi:4758556 <newline> U6 snRNP ; GO:0005688 | inferred from sequence or structural similarity with NCBI_gi:4758556 <newline> small nuclear ribonucleoprotein complex ; GO:0030532 | inferred from sequence or structural similarity with NCBI_NP:004689 AND inferred from sequence or structural similarity with SGD_LOCUS:PRP…	-
AAEL011758	peptidyl-prolyl cis-trans isomerase f, ppif [Source:VB External Description;Acc:AAEL011758]	FBgn0004432	protein folding ; GO:0006457 | non-traceable author statement <newline> autophagic cell death ; GO:0048102 | inferred from expression pattern <newline> salivary gland cell autophagic cell death ; GO:0035071 | inferred from expression pattern <newline> protein folding ; GO:0006457 | inferred from electronic annotation with InterPro:IPR002130, InterPro:IPR020892	cytosol ; GO:0005829 | inferred from sequence or structural similarity <newline> cytoplasm ; GO:0005737 | non-traceable author statement <newline> nuclear cyclin-dependent protein kinase holoenzyme complex ; GO:0019908 | non-traceable author statement <newline> positive transcription elongation factor complex b ; GO:0008024 | non-traceable author statement <newline> microtubule associated complex…	peptidyl-prolyl cis-trans isomerase activity ; GO:0003755 | inferred from sequence or structural similarity <newline> peptidyl-prolyl cis-trans isomerase activity ; GO:0003755 | non-traceable author statement <newline> cyclin-dependent protein kinase regulator activity ; GO:0016538 | non-traceable author statement <newline> peptidyl-prolyl cis-trans isomerase activity ; GO:0003755 | inferred from…
AAEL011762	conserved hypothetical protein [Source:VB External Description;Acc:AAEL011762]	FBgn0039417	biological_process ; GO:0008150 | no biological data available	cellular_component ; GO:0005575 | no biological data available	binding ; GO:0005488 | inferred from electronic annotation with InterPro:IPR011989, InterPro:IPR016024
AAEL011768	conserved hypothetical protein [Source:VB External Description;Acc:AAEL011768]	no homolog
AAEL011862	conserved hypothetical protein [Source:VB External Description;Acc:AAEL011862]	FBgn0035986	-	-	-
AAEL011876	conserved hypothetical protein [Source:VB External Description;Acc:AAEL011876]	FBgn0002183	neurogenesis ; GO:0022008 | inferred from mutant phenotype <newline> DNA unwinding involved in replication ; GO:0006268 | inferred from sequence or structural similarity with EMBL:AB004794; protein_id:BAA76334.1 <newline> regulation of chromatin assembly or disassembly ; GO:0001672 | inferred from mutant phenotype	FACT complex ; GO:0035101 | traceable author statement <newline> FACT complex ; GO:0035101 | inferred from direct assay	DNA binding ; GO:0003677 | inferred from sequence or structural similarity with EMBL:AB004794; protein_id:BAA76334.1
AAEL011879	citron ser/thr kinase [Source:VB External Description;Acc:AAEL011879]	FBgn0002466	cytokinesis ; GO:0000910 | inferred from mutant phenotype <newline> cytokinesis after mitosis ; GO:0000281 | inferred from mutant phenotype <newline> cytokinesis, completion of separation ; GO:0007109 | inferred from mutant phenotype <newline> protein phosphorylation ; GO:0006468 | non-traceable author statement <newline> cytokinesis, actomyosin contractile ring assembly ; GO:0000915 | inferred f…	actomyosin contractile ring ; GO:0005826 | inferred from direct assay	protein serine/threonine kinase activity ; GO:0004674 | non-traceable author statement <newline> diacylglycerol binding ; GO:0019992 | inferred from sequence or structural similarity with InterPro:IPR002219 <newline> protein serine/threonine kinase activity ; GO:0004674 | inferred from sequence or structural similarity with EMBL:AF086824 <newline> ATP binding ; GO:0005524 | inferred from electron…
AAEL011893	conserved hypothetical protein [Source:VB External Description;Acc:AAEL011893]	FBgn0033654	compound eye development ; GO:0048749 | inferred from mutant phenotype	-	-
AAEL011924	conserved hypothetical protein [Source:VB External Description;Acc:AAEL011924]	FBgn0038165	potassium ion transmembrane transport ; GO:0071805 | inferred from electronic annotation with InterPro:IPR003092, InterPro:IPR003280, InterPro:IPR022306	membrane ; GO:0016020 | inferred from electronic annotation with InterPro:IPR003092, InterPro:IPR003280, InterPro:IPR022306	potassium channel activity ; GO:0005267 | inferred from sequence or structural similarity with UniProtKB:Q9JL58
AAEL011927	mind bomb [Source:VB External Description;Acc:AAEL011927]	no homolog
AAEL011930	conserved hypothetical protein [Source:VB External Description;Acc:AAEL011930]	no homolog
AAEL011945	conserved hypothetical protein [Source:VB External Description;Acc:AAEL011945]	FBgn0051304
AAEL011998	hypothetical protein [Source:VB External Description;Acc:AAEL011998]	FBgn0030469	-	-	-
AAEL012041	sulphate transporter [Source:VB External Description;Acc:AAEL012041]	FBgn0034275	transmembrane transport ; GO:0055085 | inferred from electronic annotation with InterPro:IPR011547	integral to membrane ; GO:0016021 | inferred from electronic annotation with InterPro:IPR011547	high affinity sulfate transmembrane transporter activity ; GO:0015381 | inferred from sequence or structural similarity with SGD_LOCUS:SUL1; SGD:S0000498 <newline> transporter activity ; GO:0005215 | non-traceable author statement
AAEL012057	enhancer of polycomb [Source:VB External Description;Acc:AAEL012057]	FBgn0000581	chromatin organization ; GO:0006325 | inferred from mutant phenotype <newline> dendrite guidance ; GO:0070983 | inferred from mutant phenotype	polytene chromosome chromocenter ; GO:0005701 | NOT inferred from direct assay <newline> polytene chromosome ; GO:0005700 | inferred from direct assay <newline> chromatin ; GO:0000785 | non-traceable author statement <newline> intercalary heterochromatin ; GO:0005725 | non-traceable author statement	-
AAEL012062	Na+/K+ ATPase alpha subunit [Source:VB External Description;Acc:AAEL012062]	FBgn0002921	embryonic development via the syncytial blastoderm ; GO:0001700 | inferred from mutant phenotype <newline> regulation of tube diameter, open tracheal system ; GO:0035158 | inferred from mutant phenotype <newline> regulation of tube length, open tracheal system ; GO:0035159 | inferred from mutant phenotype <newline> septate junction assembly ; GO:0019991 | inferred from mutant phenotype <newline> …	septate junction ; GO:0005918 | inferred from direct assay <newline> plasma membrane ; GO:0005886 | inferred from direct assay <newline> plasma membrane ; GO:0005886 | inferred from sequence or structural similarity with UniProtKB:Q64436 <newline> sodium:potassium-exchanging ATPase complex ; GO:0005890 | inferred from sequence or structural similarity with UniProtKB:Q64436 <newline> sodium:potass…	sodium:potassium-exchanging ATPase activity ; GO:0005391 | inferred from sequence or structural similarity with UniProtKB:Q64436 <newline> sodium:potassium-exchanging ATPase activity ; GO:0005391 | non-traceable author statement <newline> sodium:potassium-exchanging ATPase activity ; GO:0005391 | inferred from mutant phenotype <newline> sodium:potassium-exchanging ATPase activity ; GO:0005391 | i…
AAEL012083	receptor protein-tyrosine phosphatase 10d [Source:VB External Description;Acc:AAEL012083]	FBgn0004370	protein dephosphorylation ; GO:0006470 | inferred from direct assay <newline> protein dephosphorylation ; GO:0006470 | non-traceable author statement <newline> protein dephosphorylation ; GO:0006470 | inferred from direct assay AND inferred from mutant phenotype <newline> central nervous system development ; GO:0007417 | inferred from genetic interaction with Ptp4E <newline> open tracheal system …	plasma membrane ; GO:0005886 | inferred from sequence or structural similarity <newline> plasma membrane ; GO:0005886 | non-traceable author statement <newline> axon ; GO:0030424 | inferred from direct assay <newline> apical part of cell ; GO:0045177 | inferred from direct assay	transmembrane receptor protein tyrosine phosphatase activity ; GO:0005001 | inferred from sequence or structural similarity <newline> protein tyrosine phosphatase activity ; GO:0004725 | inferred from sequence or structural similarity with EMBL:X54131; protein_id:CAA38066.1 <newline> protein tyrosine phosphatase activity ; GO:0004725 | inferred from direct assay <newline> protein tyrosine phospha…
AAEL012124	conserved hypothetical protein [Source:VB External Description;Acc:AAEL012124]	FBgn0031927	-	-	-
AAEL012215	conserved hypothetical protein [Source:VB External Description;Acc:AAEL012215]	no homolog
AAEL012279	Eukaryotic translation initiation factor 3 subunit J (eIF3j) [Source:VB External Description;Acc:AAEL012279]	FBgn0027619	translational initiation ; GO:0006413 | inferred from sequence or structural similarity <newline> neurogenesis ; GO:0022008 | inferred from mutant phenotype	eukaryotic translation initiation factor 3 complex ; GO:0005852 | inferred from sequence or structural similarity	translation initiation factor activity ; GO:0003743 | inferred from sequence or structural similarity
AAEL012294	adenylate cyclase type ix [Source:VB External Description;Acc:AAEL012294]	FBgn0022710	cAMP biosynthetic process ; GO:0006171 | inferred from direct assay <newline> intracellular signal transduction ; GO:0035556 | inferred from electronic annotation with InterPro:IPR001054, InterPro:IPR018297	integral to membrane ; GO:0016021 | inferred from sequence model	adenylate cyclase activity ; GO:0004016 | inferred from sequence or structural similarity with MGD:Adcy9; MGI:MGI:108450 <newline> adenylate cyclase activity ; GO:0004016 | non-traceable author statement <newline> adenylate cyclase activity ; GO:0004016 | inferred from direct assay
AAEL012305	hect E3 ubiquitin ligase [Source:VB External Description;Acc:AAEL012305]	FBgn0035207	protein modification process ; GO:0006464 | inferred from electronic annotation with InterPro:IPR000569	intracellular ; GO:0005622 | inferred from electronic annotation with InterPro:IPR000569	ubiquitin-protein ligase activity ; GO:0004842 | inferred from sequence or structural similarity with NCBI_NP:055421
AAEL012348	splicing factor 3a [Source:VB External Description;Acc:AAEL012348]	FBgn0014366	nuclear mRNA splicing, via spliceosome ; GO:0000398 | inferred from sequence or structural similarity <newline> fertilization ; GO:0009566 | inferred from mutant phenotype <newline> nuclear mRNA splicing, via spliceosome ; GO:0000398 | inferred from sequence or structural similarity with NCBI_gi:1082798 <newline> nuclear mRNA splicing, via spliceosome ; GO:0000398 | inferred from sequence or stru…	spliceosomal complex ; GO:0005681 | inferred from sequence or structural similarity <newline> spliceosomal complex ; GO:0005681 | inferred from sequence or structural similarity with NCBI_gi:1082798 <newline> U2 snRNP ; GO:0005686 | inferred from sequence or structural similarity with NCBI_NP:006793 AND inferred from sequence or structural similarity with SGD_LOCUS:PRP9; SGD:S0002188 <newline> sp…	zinc ion binding ; GO:0008270 | inferred from electronic annotation with InterPro:IPR000690, InterPro:IPR015880 <newline> nucleic acid binding ; GO:0003676 | inferred from electronic annotation with InterPro:IPR000690
AAEL012373	hypothetical protein [Source:VB External Description;Acc:AAEL012373]	no homolog
AAEL012374	conserved hypothetical protein [Source:VB External Description;Acc:AAEL012374]	FBgn0085385	DNA methylation ; GO:0006306 | inferred from electronic annotation with InterPro:IPR001525 <newline> protein phosphorylation ; GO:0006468 | inferred from electronic annotation with InterPro:IPR000719	-	protein kinase activity ; GO:0004672 | non-traceable author statement <newline> ATP binding ; GO:0005524 | inferred from electronic annotation with InterPro:IPR000719 <newline> DNA binding ; GO:0003677 | inferred from electronic annotation with InterPro:IPR001525 <newline> protein kinase activity ; GO:0004672 | inferred from electronic annotation with InterPro:IPR000719
AAEL012376	hypothetical protein [Source:VB External Description;Acc:AAEL012376]	no homolog
AAEL012390	conserved hypothetical protein [Source:VB External Description;Acc:AAEL012390]	FBgn0037755	-	-	-
AAEL012395	ATP-binding cassette transporter [Source:VB External Description;Acc:AAEL012395]	FBgn0039644	transmembrane transport ; GO:0055085 | inferred from electronic annotation with InterPro:IPR001140, InterPro:IPR011527	integral to membrane ; GO:0016021 | inferred from electronic annotation with InterPro:IPR001140, InterPro:IPR011527	xenobiotic-transporting ATPase activity ; GO:0008559 | inferred from sequence or structural similarity with EMBL:Z49144; protein_id:CAA89004 <newline> drug transmembrane transporter activity ; GO:0015238 | inferred from sequence or structural similarity with EMBL:Z49144; protein_id:CAA89004 <newline> ATP binding ; GO:0005524 | inferred from electronic annotation with InterPro:IPR001140, InterPro:…
AAEL012400	hydroxybutyrate dehydrogenase [Source:VB External Description;Acc:AAEL012400]	FBgn0033679	metabolic process ; GO:0008152 | inferred from electronic annotation with InterPro:IPR002198	-	oxidoreductase activity, acting on CH-OH group of donors ; GO:0016614 | inferred from sequence or structural similarity with EMBL:AF030513 <newline> nucleotide binding ; GO:0000166 | inferred from electronic annotation with InterPro:IPR016040
AAEL012403	conserved hypothetical protein [Source:VB External Description;Acc:AAEL012403]	no homolog
AAEL012431	AMP dependent ligase [Source:VB External Description;Acc:AAEL012431]	FBgn0037996	metabolic process ; GO:0008152 | inferred from electronic annotation with InterPro:IPR000873	-	long-chain fatty acid transporter activity ; GO:0005324 | inferred from sequence or structural similarity with SGD_LOCUS:FAT2; SGD:S0000426 <newline> catalytic activity ; GO:0003824 | inferred from electronic annotation with InterPro:IPR000873
AAEL012462	conserved hypothetical protein [Source:VB External Description;Acc:AAEL012462]	FBgn0085430	-	-	zinc ion binding ; GO:0008270 | inferred from electronic annotation with InterPro:IPR007527
AAEL012463	conserved hypothetical protein [Source:VB External Description;Acc:AAEL012463]	no homolog
AAEL012464	alanine-glyoxylate aminotransferase [Source:VB External Description;Acc:AAEL012464]	FBgn0036381	arginine catabolic process to glutamate ; GO:0019544 | inferred from sequence or structural similarity with UniProtKB:Q940M2	mitochondrion ; GO:0005739 | inferred from sequence or structural similarity with UniProtKB:Q940M2	ornithine-oxo-acid transaminase activity ; GO:0004587 | inferred from sequence or structural similarity with NCBI_gi:1168056 <newline> alanine-glyoxylate transaminase activity ; GO:0008453 | inferred from sequence or structural similarity with UniProtKB:Q940M2 <newline> pyridoxal phosphate binding ; GO:0030170 | inferred from electronic annotation with InterPro:IPR005814, InterPro:IPR015421, Inte…
AAEL012516	hypothetical protein [Source:VB External Description;Acc:AAEL012516]	no homolog
AAEL012585	60S ribosomal protein L7 [Source:VB External Description;Acc:AAEL012585]	FBgn0005593	translation ; GO:0006412 | inferred from sequence or structural similarity with UniProtKB:P05426 <newline> translation ; GO:0006412 | non-traceable author statement <newline> mitotic spindle elongation ; GO:0000022 | inferred from mutant phenotype <newline> mitotic spindle organization ; GO:0007052 | inferred from mutant phenotype	ribosome ; GO:0005840 | non-traceable author statement <newline> cytosolic large ribosomal subunit ; GO:0022625 | inferred from sequence or structural similarity with UniProtKB:P05426	structural constituent of ribosome ; GO:0003735 | inferred from sequence or structural similarity with UniProtKB:P05426 <newline> mRNA binding ; GO:0003729 | non-traceable author statement <newline> rRNA binding ; GO:0019843 | non-traceable author statement <newline> structural constituent of ribosome ; GO:0003735 | non-traceable author statement
AAEL012604	hypothetical protein [Source:VB External Description;Acc:AAEL012604]	no homolog
AAEL012606	islet cell autoantigen [Source:VB External Description;Acc:AAEL012606]	FBgn0037050	-	-	-
AAEL012607	fetal alzheimer antigen, falz [Source:VB External Description;Acc:AAEL012607]	FBgn0000541	nucleosome mobilization ; GO:0042766 | inferred from direct assay <newline> nucleosome assembly ; GO:0006334 | non-traceable author statement <newline> chromatin remodeling ; GO:0006338 | inferred from mutant phenotype <newline> hemopoiesis ; GO:0030097 | inferred from mutant phenotype <newline> nucleosome mobilization ; GO:0042766 | traceable author statement <newline> ecdysone receptor-mediated…	NURF complex ; GO:0016589 | non-traceable author statement <newline> NURF complex ; GO:0016589 | traceable author statement <newline> NURF complex ; GO:0016589 | inferred from direct assay	ligand-dependent nuclear receptor binding ; GO:0016922 | inferred from physical interaction with EcR <newline> DNA binding ; GO:0003677 | inferred from electronic annotation with InterPro:IPR017956 <newline> zinc ion binding ; GO:0008270 | inferred from electronic annotation with InterPro:IPR001965
AAEL012620	hypothetical protein [Source:VB External Description;Acc:AAEL012620]	no homolog
AAEL012669	DNA polymerase delta small subunit [Source:VB External Description;Acc:AAEL012669]	FBgn0027903	DNA replication ; GO:0006260 | non-traceable author statement <newline> mitotic spindle organization ; GO:0007052 | inferred from mutant phenotype <newline> response to DNA damage stimulus ; GO:0006974 | inferred from mutant phenotype <newline> DNA replication ; GO:0006260 | inferred from electronic annotation with InterPro:IPR007185	delta DNA polymerase complex ; GO:0043625 | inferred from sequence or structural similarity with UniProtKB:O35654 <newline> delta DNA polymerase complex ; GO:0043625 | non-traceable author statement <newline> microtubule associated complex ; GO:0005875 | inferred from direct assay	DNA-directed DNA polymerase activity ; GO:0003887 | inferred from sequence or structural similarity with UniProtKB:O35654 <newline> DNA-directed DNA polymerase activity ; GO:0003887 | non-traceable author statement <newline> DNA binding ; GO:0003677 | inferred from electronic annotation with InterPro:IPR007185
AAEL012698	ATP-binding cassette sub-family A member 3, putative [Source:VB External Description;Acc:AAEL012698]	FBgn0031170	-	ATP-binding cassette (ABC) transporter complex ; GO:0043190 | inferred from sequence or structural similarity with EMBL:X97187	ATPase activity, coupled to transmembrane movement of substances ; GO:0042626 | inferred from sequence or structural similarity with EMBL:X97187 <newline> transporter activity ; GO:0005215 | inferred from sequence or structural similarity with EMBL:X97187 <newline> ATP binding ; GO:0005524 | inferred from electronic annotation with InterPro:IPR003439, InterPro:IPR017871
AAEL012699	hypothetical protein [Source:VB External Description;Acc:AAEL012699]	FBgn0035126
AAEL012700	ATP-binding cassette sub-family A member 3, putative [Source:VB External Description;Acc:AAEL012700]	FBgn0031170	-	ATP-binding cassette (ABC) transporter complex ; GO:0043190 | inferred from sequence or structural similarity with EMBL:X97187	ATPase activity, coupled to transmembrane movement of substances ; GO:0042626 | inferred from sequence or structural similarity with EMBL:X97187 <newline> transporter activity ; GO:0005215 | inferred from sequence or structural similarity with EMBL:X97187 <newline> ATP binding ; GO:0005524 | inferred from electronic annotation with InterPro:IPR003439, InterPro:IPR017871
AAEL012702	ATP-binding cassette sub-family A member 3, putative [Source:VB External Description;Acc:AAEL012702]	FBgn0031170	-	ATP-binding cassette (ABC) transporter complex ; GO:0043190 | inferred from sequence or structural similarity with EMBL:X97187	ATPase activity, coupled to transmembrane movement of substances ; GO:0042626 | inferred from sequence or structural similarity with EMBL:X97187 <newline> transporter activity ; GO:0005215 | inferred from sequence or structural similarity with EMBL:X97187 <newline> ATP binding ; GO:0005524 | inferred from electronic annotation with InterPro:IPR003439, InterPro:IPR017871
AAEL012707	conserved hypothetical protein [Source:VB External Description;Acc:AAEL012707]	FBgn0052479	ubiquitin-dependent protein catabolic process ; GO:0006511 | inferred from electronic annotation with InterPro:IPR001394, InterPro:IPR018200	-	ubiquitin thiolesterase activity ; GO:0004221 | inferred from electronic annotation with InterPro:IPR001394, InterPro:IPR018200
AAEL012709	conserved hypothetical protein [Source:VB External Description;Acc:AAEL012709]	FBgn0031119	-	-	actin binding ; GO:0003779 | inferred from sequence or structural similarity with EMBL:U65079
AAEL012712	Clip-domain serine protease, family C. [Source:VB External Description;Acc:AAEL012712]	FBgn0030926	positive regulation of antifungal peptide biosynthetic process ; GO:0006967 | inferred from mutant phenotype <newline> proteolysis ; GO:0006508 | non-traceable author statement <newline> proteolysis ; GO:0006508 | traceable author statement <newline> regulation of Toll signaling pathway ; GO:0008592 | traceable author statement <newline> defense response to fungus ; GO:0050832 | traceable author …	extracellular region ; GO:0005576 | inferred from direct assay	peptidase activity ; GO:0008233 | traceable author statement <newline> peptidase activity ; GO:0008233 | inferred from mutant phenotype <newline> serine-type endopeptidase activity ; GO:0004252 | non-traceable author statement <newline> serine-type endopeptidase activity ; GO:0004252 | inferred from electronic annotation with InterPro:IPR001254, InterPro:IPR001314, InterPro:IPR006604, InterPro:IP…
AAEL012714	hypothetical protein [Source:VB External Description;Acc:AAEL012714]	no homolog
AAEL012719	cdp-diacylglycerol--glycerol-3-phosphate 3-phosphatidyltransferase [Source:VB External Description;Acc:AAEL012719]	FBgn0039360	phospholipid biosynthetic process ; GO:0008654 | non-traceable author statement <newline> mitochondrial membrane organization ; GO:0007006 | inferred from direct assay <newline> ATP biosynthetic process ; GO:0006754 | inferred from direct assay <newline> phospholipid biosynthetic process ; GO:0008654 | inferred from electronic annotation with InterPro:IPR000462	integral to membrane ; GO:0016021 | non-traceable author statement <newline> membrane ; GO:0016020 | inferred from electronic annotation with InterPro:IPR000462	CDP-alcohol phosphatidyltransferase activity ; GO:0017169 | inferred from sequence or structural similarity with EMBL:Z99295; protein_id:CAB16578 <newline> CDP-alcohol phosphatidyltransferase activity ; GO:0017169 | non-traceable author statement <newline> cardiolipin synthase activity ; GO:0008808 | inferred from direct assay
AAEL012731	Adenylate kinase 2, mitochondrial (AK 2)(EC 2.7.4.3)(ATP-AMP transphosphorylase 2) [Source:VB External Description;Acc:AAEL012731]	FBgn0022708	ADP biosynthetic process ; GO:0006172 | inferred from sequence or structural similarity with UniProtKB:P54819 <newline> neurogenesis ; GO:0022008 | inferred from mutant phenotype <newline> nucleotide phosphorylation ; GO:0046939 | inferred from electronic annotation with InterPro:IPR006259	mitochondrion ; GO:0005739 | inferred from sequence or structural similarity with UniProtKB:P29410 <newline> mitochondrial intermembrane space ; GO:0005758 | inferred from sequence or structural similarity with UniProtKB:P54819 <newline> lipid particle ; GO:0005811 | inferred from direct assay	adenylate kinase activity ; GO:0004017 | inferred from sequence or structural similarity with UniProtKB:P29410 <newline> adenylate kinase activity ; GO:0004017 | inferred from sequence or structural similarity with UniProtKB:P54819 <newline> ATP binding ; GO:0005524 | inferred from electronic annotation with InterPro:IPR000850, InterPro:IPR006259
AAEL012741	conserved hypothetical protein [Source:VB External Description;Acc:AAEL012741]	FBgn0038815	cellular process ; GO:0009987 | inferred from mutant phenotype <newline> neurogenesis ; GO:0022008 | inferred from mutant phenotype	-	nucleotide binding ; GO:0000166 | inferred from electronic annotation with InterPro:IPR016040
AAEL012778	protease m1 zinc metalloprotease [Source:VB External Description;Acc:AAEL012778]	no homolog
AAEL012794	conserved hypothetical protein [Source:VB External Description;Acc:AAEL012794]	FBgn0034253	-	-	-
AAEL012836	cytochrome B561 [Source:VB External Description;Acc:AAEL012836]	FBgn0036710	phagocytosis, engulfment ; GO:0006911 | inferred from mutant phenotype	-	-
AAEL012840	stathmin [Source:VB External Description;Acc:AAEL012840]	FBgn0051641	microtubule-based process ; GO:0007017 | inferred from sequence or structural similarity <newline> germ cell migration ; GO:0008354 | inferred from mutant phenotype <newline> nervous system development ; GO:0007399 | inferred from mutant phenotype <newline> microtubule-based process ; GO:0007017 | inferred from sequence or structural similarity with UniProtKB:P13668 <newline> intracellular signal…	microtubule associated complex ; GO:0005875 | inferred from sequence or structural similarity <newline> microtubule associated complex ; GO:0005875 | inferred from sequence or structural similarity with UniProtKB:P13668 <newline> microtubule associated complex ; GO:0005875 | inferred from direct assay	microtubule binding ; GO:0008017 | inferred from sequence or structural similarity <newline> tubulin binding ; GO:0015631 | inferred from direct assay
AAEL012905	conserved hypothetical protein [Source:VB External Description;Acc:AAEL012905]	no homolog
AAEL012910	hypothetical protein [Source:VB External Description;Acc:AAEL012910]	no homolog
AAEL012912	conserved hypothetical protein [Source:VB External Description;Acc:AAEL012912]	FBgn0033995	-	-	-
AAEL012946	conserved hypothetical protein [Source:VB External Description;Acc:AAEL012946]	FBgn0034095	-	-	-
AAEL012951	transformation/transcription domain-associated protein [Source:VB External Description;Acc:AAEL012951]	FBgn0053554	cytokinesis ; GO:0000910 | inferred from mutant phenotype <newline> phagocytosis, engulfment ; GO:0006911 | inferred from mutant phenotype <newline> positive regulation of Notch signaling pathway ; GO:0045747 | inferred from genetic interaction with N inferred from genetic interaction with mam <newline> wing disc pattern formation ; GO:0035222 | inferred from genetic interaction with N inferred f…	SAGA complex ; GO:0000124 | non-traceable author statement <newline> histone acetyltransferase complex ; GO:0000123 | inferred from direct assay <newline> microtubule associated complex ; GO:0005875 | inferred from direct assay <newline> nucleus ; GO:0005634 | inferred from direct assay <newline> cytoplasm ; GO:0005737 | inferred from direct assay <newline> polytene chromosome puff ; GO:0005703 |…	protein kinase activity ; GO:0004672 | non-traceable author statement <newline> binding ; GO:0005488 | inferred from electronic annotation with InterPro:IPR011989, InterPro:IPR011990, InterPro:IPR016024 <newline> phosphotransferase activity, alcohol group as acceptor ; GO:0016773 | inferred from electronic annotation with InterPro:IPR000403
AAEL012960	importin alpha [Source:VB External Description;Acc:AAEL012960]	FBgn0011823	lymph gland development ; GO:0048542 | inferred from mutant phenotype <newline> cytoplasmic transport ; GO:0016482 | inferred from mutant phenotype <newline> cytoplasmic transport, nurse cell to oocyte ; GO:0007303 | non-traceable author statement <newline> protein import into nucleus ; GO:0006606 | non-traceable author statement <newline> sperm individualization ; GO:0007291 | inferred from muta…	actin cytoskeleton ; GO:0015629 | non-traceable author statement <newline> cytoplasm ; GO:0005737 | non-traceable author statement <newline> nuclear pore ; GO:0005643 | non-traceable author statement <newline> nucleus ; GO:0005634 | non-traceable author statement <newline> lipid particle ; GO:0005811 | inferred from direct assay <newline> microtubule associated complex ; GO:0005875 | inferred fro…	protein transmembrane transporter activity ; GO:0008320 | non-traceable author statement <newline> protein transporter activity ; GO:0008565 | inferred from electronic annotation with InterPro:IPR002652 <newline> binding ; GO:0005488 | inferred from electronic annotation with InterPro:IPR011989, InterPro:IPR016024
AAEL012966	hypothetical protein [Source:VB External Description;Acc:AAEL012966]	no homolog
AAEL012968	hypothetical protein [Source:VB External Description;Acc:AAEL012968]	FBgn0051556	proteolysis ; GO:0006508 | inferred from electronic annotation with InterPro:IPR000209	cellular_component ; GO:0005575 | no biological data available	serine-type endopeptidase activity ; GO:0004252 | inferred from electronic annotation with InterPro:IPR000209
AAEL013016	regulator of sex-limitation [Source:VB External Description;Acc:AAEL013016]	no homolog
AAEL013022	zinc finger protein [Source:VB External Description;Acc:AAEL013022]	no homolog
AAEL013023	hypothetical protein [Source:VB External Description;Acc:AAEL013023]	FBgn0031257	-	intracellular ; GO:0005622 | inferred from electronic annotation with InterPro:IPR007087, InterPro:IPR015880	zinc ion binding ; GO:0008270 | inferred from electronic annotation with InterPro:IPR007087, InterPro:IPR015880
AAEL013030	hypothetical protein [Source:VB External Description;Acc:AAEL013030]	FBgn0036617	-	-	structural constituent of chitin-based cuticle ; GO:0005214 | inferred from sequence or structural similarity with EMBL:AJ000044; protein_id:CAA03880 <newline> structural constituent of chitin-based cuticle ; GO:0005214 | inferred from sequence or structural similarity with Pfam:PF00379 inferred from sequence or structural similarity with InterPro:IPR000618
AAEL013031	conserved hypothetical protein [Source:VB External Description;Acc:AAEL013031]	FBgn0036617	-	-	structural constituent of chitin-based cuticle ; GO:0005214 | inferred from sequence or structural similarity with EMBL:AJ000044; protein_id:CAA03880 <newline> structural constituent of chitin-based cuticle ; GO:0005214 | inferred from sequence or structural similarity with Pfam:PF00379 inferred from sequence or structural similarity with InterPro:IPR000618
AAEL013042	conserved hypothetical protein [Source:VB External Description;Acc:AAEL013042]	no homolog
AAEL013079	conserved hypothetical protein [Source:VB External Description;Acc:AAEL013079]	FBgn0039590	biological_process ; GO:0008150 | no biological data available	cellular_component ; GO:0005575 | no biological data available	molecular_function ; GO:0003674 | no biological data available
AAEL013086	hypothetical protein [Source:VB External Description;Acc:AAEL013086]	no homolog
AAEL013139	GTPase_rho [Source:VB External Description;Acc:AAEL013139]	FBgn0014020	gastrulation involving germ band extension ; GO:0010004 | inferred from mutant phenotype <newline> germ-band extension ; GO:0007377 | inferred from mutant phenotype <newline> posterior midgut invagination ; GO:0007374 | inferred from mutant phenotype <newline> ventral furrow formation ; GO:0007370 | inferred from mutant phenotype <newline> JNK cascade ; GO:0007254 | non-traceable author statement…	cell cortex ; GO:0005938 | inferred from direct assay <newline> cell hair ; GO:0070451 | inferred from direct assay <newline> cytoplasm ; GO:0005737 | inferred from direct assay	GTPase activity ; GO:0003924 | inferred from sequence or structural similarity with EMBL:AF014371 <newline> GTPase activity ; GO:0003924 | non-traceable author statement <newline> protein binding ; GO:0005515 | inferred from physical interaction with rok <newline> GTPase activity ; GO:0003924 | traceable author statement <newline> GTPase activity ; GO:0003924 | inferred from sequence or structura…
AAEL013182	ATP-dependent RNA helicase [Source:VB External Description;Acc:AAEL013182]	FBgn0030246	-	-	helicase activity ; GO:0004386 | inferred from sequence or structural similarity <newline> ATP-dependent helicase activity ; GO:0008026 | inferred from sequence or structural similarity with InterPro:IPR001410 <newline> ATP binding ; GO:0005524 | inferred from electronic annotation with InterPro:IPR001650, InterPro:IPR011545 <newline> zinc ion binding ; GO:0008270 | inferred from electronic annot…
AAEL013194	conserved hypothetical protein [Source:VB External Description;Acc:AAEL013194]	FBgn0038358	cilium assembly ; GO:0042384 | inferred from sequence model	-	identical protein binding ; GO:0042802 | inferred from electronic annotation with InterPro:IPR011717
AAEL013196	AaGr23 [Source:VB External Description;Acc:AAEL013196]	no homolog
AAEL013254	hypothetical protein [Source:VB External Description;Acc:AAEL013254]	FBgn0032671	biological_process ; GO:0008150 | no biological data available	cellular_component ; GO:0005575 | no biological data available	molecular_function ; GO:0003674 | no biological data available
AAEL013260	alpha methylacyl-coa racemase [Source:VB External Description;Acc:AAEL013260]	FBgn0032881	metabolic process ; GO:0008152 | inferred from electronic annotation with InterPro:IPR003673	-	alpha-methylacyl-CoA racemase activity ; GO:0008111 | inferred from sequence or structural similarity with EMBL:U89905
AAEL013292	hypothetical protein [Source:VB External Description;Acc:AAEL013292]	FBgn0039044	regulation of organ growth ; GO:0046620 | inferred from mutant phenotype <newline> regulation of cell proliferation ; GO:0042127 | inferred from mutant phenotype <newline> DNA damage response, signal transduction by p53 class mediator ; GO:0030330 | traceable author statement <newline> DNA damage response, signal transduction resulting in induction of apoptosis ; GO:0008630 | traceable author sta…	nucleus ; GO:0005634 | inferred by curator from GO:0003702 <newline> nucleus ; GO:0005634 | inferred from electronic annotation with InterPro:IPR002117, InterPro:IPR012346	sequence-specific DNA binding transcription factor activity ; GO:0003700 | non-traceable author statement <newline> DNA binding ; GO:0003677 | non-traceable author statement <newline> protein binding ; GO:0005515 | inferred from physical interaction with DLP <newline> protein binding ; GO:0005515 | inferred from physical interaction with UniProtKB:Q95SP2 <newline> transcription regulatory region …
AAEL013296	conserved hypothetical protein [Source:VB External Description;Acc:AAEL013296]	FBgn0037304	-	-	-
AAEL013312	dual-specificity protein phosphatase, putative [Source:VB External Description;Acc:AAEL013312]	FBgn0031044	protein dephosphorylation ; GO:0006470 | non-traceable author statement <newline> negative regulation of JUN kinase activity ; GO:0043508 | inferred from mutant phenotype <newline> protein dephosphorylation ; GO:0006470 | inferred from electronic annotation with InterPro:IPR000340, InterPro:IPR016278, InterPro:IPR020422	nucleus ; GO:0005634 | inferred from direct assay	protein tyrosine/serine/threonine phosphatase activity ; GO:0008138 | non-traceable author statement <newline> phosphatase activity ; GO:0016791 | inferred from direct assay <newline> protein tyrosine phosphatase activity ; GO:0004725 | inferred from electronic annotation with InterPro:IPR016130 <newline> protein tyrosine/serine/threonine phosphatase activity ; GO:0008138 | inferred from electron…
AAEL013328	soluble guanylate cyclase gcy [Source:VB External Description;Acc:AAEL013328]	FBgn0038295	cGMP biosynthetic process ; GO:0006182 | inferred by curator from GO:0004383 <newline> response to hypoxia ; GO:0001666 | inferred from mutant phenotype <newline> cGMP biosynthetic process ; GO:0006182 | inferred from direct assay <newline> intracellular signal transduction ; GO:0035556 | inferred from electronic annotation with InterPro:IPR001054, InterPro:IPR018297	guanylate cyclase complex, soluble ; GO:0008074 | inferred from sequence or structural similarity <newline> guanylate cyclase complex, soluble ; GO:0008074 | inferred from sequence or structural similarity with EMBL:AF064514 <newline> guanylate cyclase complex, soluble ; GO:0008074 | inferred from direct assay	guanylate cyclase activity ; GO:0004383 | non-traceable author statement <newline> guanylate cyclase activity ; GO:0004383 | inferred from direct assay <newline> guanylate cyclase activity ; GO:0004383 | inferred from sequence or structural similarity with EMBL:AF064514 <newline> guanylate cyclase activity ; GO:0004383 | inferred from sequence or structural similarity with EMBL:AF064514; protein_…
AAEL013335	conserved hypothetical protein [Source:VB External Description;Acc:AAEL013335]	FBgn0037536	-	-	-
AAEL013409	down syndrome cell adhesion molecule [Source:VB External Description;Acc:AAEL013409]	FBgn0052387
AAEL013438	LIM domain-binding protein 3, putative [Source:VB External Description;Acc:AAEL013438]	FBgn0083919	-	muscle tendon junction ; GO:0005927 | inferred from direct assay <newline> Z disc ; GO:0030018 | inferred from direct assay	protein binding ; GO:0005515 | inferred from physical interaction with egg <newline> zinc ion binding ; GO:0008270 | inferred from electronic annotation with InterPro:IPR001781
AAEL013478	conserved hypothetical protein [Source:VB External Description;Acc:AAEL013478]	FBgn0033899	-	-	-
AAEL013496	Prophenoloxidase [Source:VB External Description;Acc:AAEL013496]	FBgn0000165
AAEL013727	conserved hypothetical protein [Source:VB External Description;Acc:AAEL013727]	FBgn0033960	biological_process ; GO:0008150 | no biological data available	cellular_component ; GO:0005575 | no biological data available	molecular_function ; GO:0003674 | no biological data available
AAEL013729	myotonin-protein kinase [Source:VB External Description;Acc:AAEL013729]	FBgn0023081	actin polymerization or depolymerization ; GO:0008154 | inferred from mutant phenotype <newline> regulation of actin polymerization or depolymerization ; GO:0008064 | non-traceable author statement <newline> protein phosphorylation ; GO:0006468 | inferred from sequence or structural similarity <newline> protein phosphorylation ; GO:0006468 | non-traceable author statement <newline> protein phosph…	cellular_component ; GO:0005575 | no biological data available	protein kinase activity ; GO:0004672 | inferred from direct assay <newline> protein serine/threonine kinase activity ; GO:0004674 | inferred from sequence or structural similarity <newline> protein serine/threonine kinase activity ; GO:0004674 | non-traceable author statement <newline> diacylglycerol binding ; GO:0019992 | inferred from sequence or structural similarity with InterPro:IPR002219 <n…
AAEL013752	rfx5 [Source:VB External Description;Acc:AAEL013752]	FBgn0037445	regulation of transcription, DNA-dependent ; GO:0006355 | inferred from electronic annotation with InterPro:IPR003150	-	DNA binding ; GO:0003677 | inferred from sequence or structural similarity with UniProtKB:P48382
AAEL013797	conserved hypothetical protein [Source:VB External Description;Acc:AAEL013797]	FBgn0031955	microtubule-based movement ; GO:0007018 | inferred from electronic annotation with InterPro:IPR001752	cellular_component ; GO:0005575 | no biological data available	ATP binding ; GO:0005524 | inferred from electronic annotation with InterPro:IPR001752 <newline> microtubule motor activity ; GO:0003777 | inferred from electronic annotation with InterPro:IPR001752
AAEL013831	pyrroline-5-carboxylate dehydrogenase [Source:VB External Description;Acc:AAEL013831]	FBgn0037138	proline metabolic process ; GO:0006560 | inferred from sequence or structural similarity with UniProtKB:P30038 <newline> proline metabolic process ; GO:0006560 | inferred from mutant phenotype <newline> mitochondrion organization ; GO:0007005 | inferred from mutant phenotype <newline> oxidation-reduction process ; GO:0055114 | inferred from electronic annotation with InterPro:IPR005931, InterPro:…	mitochondrial matrix ; GO:0005759 | inferred from sequence or structural similarity with UniProtKB:P30038 <newline> mitochondrion ; GO:0005739 | inferred from direct assay	1-pyrroline-5-carboxylate dehydrogenase activity ; GO:0003842 | inferred from sequence or structural similarity with SGD_LOCUS:PUT2; SGD:S0001079 <newline> 1-pyrroline-5-carboxylate dehydrogenase activity ; GO:0003842 | inferred from sequence or structural similarity with UniProtKB:P30038 <newline> oxidoreductase activity, acting on the aldehyde or oxo group of donors, NAD or NADP as acceptor ; G…
AAEL013971	conserved hypothetical protein [Source:VB External Description;Acc:AAEL013971]	FBgn0050471	-	-	transferase activity, transferring acyl groups other than amino-acyl groups ; GO:0016747 | inferred from electronic annotation with InterPro:IPR002656
AAEL014010	pickpocket [Source:VB External Description;Acc:AAEL014010]	FBgn0030844	inter-male aggressive behavior ; GO:0002121 | inferred from mutant phenotype <newline> sodium ion transport ; GO:0006814 | inferred from electronic annotation with InterPro:IPR001873	membrane ; GO:0016020 | inferred from electronic annotation with InterPro:IPR001873	sodium channel activity ; GO:0005272 | non-traceable author statement <newline> sodium channel activity ; GO:0005272 | inferred from electronic annotation with InterPro:IPR001873
AAEL014021	Mediator of RNA polymerase II transcription subunit 23 (Mediator complex subunit 23) [Source:VB External Description;Acc:AAEL014021]	FBgn0034795	transcription initiation from RNA polymerase II promoter ; GO:0006367 | inferred from sequence or structural similarity <newline> transcription from RNA polymerase II promoter ; GO:0006366 | inferred from sequence or structural similarity with EMBL:AF105332; protein_id:AAD31729.1	nucleus ; GO:0005634 | inferred from sequence or structural similarity with EMBL:AF105332; protein_id:AAD31729.1 <newline> mediator complex ; GO:0016592 | inferred from sequence or structural similarity <newline> mediator complex ; GO:0016592 | inferred from sequence or structural similarity with EMBL:AF105332; protein_id:AAD31729.1	RNA polymerase II transcription cofactor activity ; GO:0001104 | inferred from sequence or structural similarity <newline> RNA polymerase II transcription cofactor activity ; GO:0001104 | inferred from sequence or structural similarity with EMBL:AF105332; protein_id:AAD31729.1
AAEL014030	conserved hypothetical protein [Source:VB External Description;Acc:AAEL014030]	FBgn0036621	-	-	zinc ion binding ; GO:0008270 | inferred from electronic annotation with InterPro:IPR000571, InterPro:IPR001841 <newline> nucleic acid binding ; GO:0003676 | inferred from electronic annotation with InterPro:IPR000571
AAEL014086	conserved hypothetical protein [Source:VB External Description;Acc:AAEL014086]	no homolog
AAEL014091	Copper-Zinc(Cu-Zn) Superoxide Dismutase. [Source:VB External Description;Acc:AAEL014091]	FBgn0039386	oxidation-reduction process ; GO:0055114 | inferred from electronic annotation with InterPro:IPR001424, InterPro:IPR024134 <newline> superoxide metabolic process ; GO:0006801 | inferred from electronic annotation with InterPro:IPR001424	-	superoxide dismutase activity ; GO:0004784 | inferred from electronic annotation with InterPro:IPR024134 <newline> metal ion binding ; GO:0046872 | inferred from electronic annotation with InterPro:IPR001424
AAEL014125	nk homeobox protein [Source:VB External Description;Acc:AAEL014125]	FBgn0085448	regulation of transcription, DNA-dependent ; GO:0006355 | inferred from electronic annotation with InterPro:IPR001356, InterPro:IPR012287, InterPro:IPR017970	nucleus ; GO:0005634 | inferred from sequence or structural similarity with EMBL:AJ009935; protein_id:CAA08911	sequence-specific DNA binding transcription factor activity ; GO:0003700 | inferred from sequence or structural similarity with EMBL:AJ009935; protein_id:CAA08911 <newline> sequence-specific DNA binding ; GO:0043565 | inferred from electronic annotation with InterPro:IPR001356, InterPro:IPR017970
AAEL014132	conserved hypothetical protein [Source:VB External Description;Acc:AAEL014132]	FBgn0042103	-	-	-
AAEL014144	rapsynoid [Source:VB External Description;Acc:AAEL014144]	FBgn0035898
AAEL014147	conserved hypothetical protein [Source:VB External Description;Acc:AAEL014147]	FBgn0035691	neurogenesis ; GO:0022008 | inferred from mutant phenotype	nucleus ; GO:0005634 | inferred from electronic annotation with InterPro:IPR012934	zinc ion binding ; GO:0008270 | inferred from electronic annotation with InterPro:IPR007087, InterPro:IPR012934, InterPro:IPR015880 <newline> nucleic acid binding ; GO:0003676 | inferred from electronic annotation with InterPro:IPR013087
AAEL014181	hypothetical protein [Source:VB External Description;Acc:AAEL014181]	FBgn0032673	protein dephosphorylation ; GO:0006470 | non-traceable author statement <newline> protein dephosphorylation ; GO:0006470 | inferred from sequence or structural similarity with UniProtKB:Q15262	-	protein tyrosine phosphatase activity ; GO:0004725 | non-traceable author statement <newline> protein tyrosine phosphatase activity ; GO:0004725 | inferred from sequence or structural similarity with UniProtKB:Q15262
AAEL014260	hypothetical protein [Source:VB External Description;Acc:AAEL014260]	no homolog
AAEL014267	conserved hypothetical protein [Source:VB External Description;Acc:AAEL014267]	FBgn0039540
AAEL014270	conserved hypothetical protein [Source:VB External Description;Acc:AAEL014270]	FBgn0032983
AAEL014274	conserved hypothetical protein [Source:VB External Description;Acc:AAEL014274]	no homolog
AAEL014331	protein phosphatase 2c [Source:VB External Description;Acc:AAEL014331]	FBgn0031194	protein dephosphorylation ; GO:0006470 | non-traceable author statement <newline> protein dephosphorylation ; GO:0006470 | inferred from electronic annotation with InterPro:IPR000222	protein serine/threonine phosphatase complex ; GO:0008287 | inferred from electronic annotation with InterPro:IPR000222	protein serine/threonine phosphatase activity ; GO:0004722 | non-traceable author statement <newline> protein serine/threonine phosphatase activity ; GO:0004722 | inferred from electronic annotation with InterPro:IPR000222
AAEL014336	conserved hypothetical protein [Source:VB External Description;Acc:AAEL014336]	no homolog
AAEL014341	metallocarboxypeptidase, putative [Source:VB External Description;Acc:AAEL014341]	no homolog
AAEL014342	hypothetical protein [Source:VB External Description;Acc:AAEL014342]	no homolog
AAEL014368	sap18 [Source:VB External Description;Acc:AAEL014368]	FBgn0024491	negative regulation of transcription, DNA-dependent ; GO:0045892 | inferred from direct assay <newline> negative regulation of transcription from RNA polymerase II promoter ; GO:0000122 | non-traceable author statement <newline> chromatin silencing ; GO:0006342 | inferred from genetic interaction with Kr <newline> nuclear mRNA splicing, via spliceosome ; GO:0000398 | inferred by curator from GO:0…	Sin3 complex ; GO:0016580 | inferred from sequence or structural similarity with EMBL:U96915 <newline> nucleus ; GO:0005634 | non-traceable author statement <newline> precatalytic spliceosome ; GO:0071011 | inferred from direct assay <newline> catalytic step 2 spliceosome ; GO:0071013 | inferred from direct assay	protein binding ; GO:0005515 | inferred from physical interaction with bcd <newline> transcription corepressor activity ; GO:0003714 | non-traceable author statement <newline> transcription factor binding ; GO:0008134 | inferred from physical interaction with Kr <newline> transcription corepressor activity ; GO:0003714 | inferred from genetic interaction with Kr
AAEL014369	conserved hypothetical protein [Source:VB External Description;Acc:AAEL014369]	FBgn0038405	-	-	structural constituent of cuticle ; GO:0042302 | inferred from electronic annotation with InterPro:IPR000618
AAEL014376	hypothetical protein [Source:VB External Description;Acc:AAEL014376]	FBgn0036036	neurogenesis ; GO:0022008 | inferred from mutant phenotype	-	-
AAEL014377	conserved hypothetical protein [Source:VB External Description;Acc:AAEL014377]	FBgn0086349
AAEL014411	cytochrome P450 [Source:VB External Description;Acc:AAEL014411]	FBgn0038095	insecticide metabolic process ; GO:0017143 | non-traceable author statement <newline> oxidation-reduction process ; GO:0055114 | inferred from electronic annotation with InterPro:IPR001128, InterPro:IPR002401, InterPro:IPR017972	microsome ; GO:0005792 | non-traceable author statement <newline> membrane ; GO:0016020 | non-traceable author statement	electron carrier activity ; GO:0009055 | non-traceable author statement <newline> electron carrier activity ; GO:0009055 | inferred from sequence or structural similarity <newline> oxidoreductase activity, acting on paired donors, with incorporation or reduction of molecular oxygen ; GO:0016705 | inferred from electronic annotation with InterPro:IPR001128, InterPro:IPR002401, InterPro:IPR017972 <…
AAEL014485	hypothetical protein [Source:VB External Description;Acc:AAEL014485]	FBgn0035126
AAEL014503	conserved hypothetical protein [Source:VB External Description;Acc:AAEL014503]	FBgn0031078	SMAD protein import into nucleus ; GO:0007184 | inferred from mutant phenotype <newline> neurogenesis ; GO:0022008 | inferred from mutant phenotype	-	-
AAEL014529	conserved hypothetical protein [Source:VB External Description;Acc:AAEL014529]	FBgn0039110	negative regulation of Wnt receptor signaling pathway ; GO:0030178 | inferred from direct assay <newline> nuclear export ; GO:0051168 | inferred from mutant phenotype	-	-
AAEL014533	conserved hypothetical protein [Source:VB External Description;Acc:AAEL014533]	FBgn0034113	-	-	-
AAEL014535	conserved hypothetical protein [Source:VB External Description;Acc:AAEL014535]	FBgn0035059	intracellular signal transduction ; GO:0035556 | inferred from electronic annotation with InterPro:IPR001496	-	-
AAEL014536	embryonic ectoderm development protein [Source:VB External Description;Acc:AAEL014536]	FBgn0032391	histone H3-K27 methylation ; GO:0070734 | inferred from genetic interaction with esc	ESC/E(Z) complex ; GO:0035098 | inferred from direct assay	histone methyltransferase activity ; GO:0042054 | contributes_to inferred from direct assay
AAEL014542	hypothetical protein [Source:VB External Description;Acc:AAEL014542]	no homolog
AAEL014550	homeobox protein pknox1 [Source:VB External Description;Acc:AAEL014550]	no homolog
AAEL014558	conserved hypothetical protein [Source:VB External Description;Acc:AAEL014558]	FBgn0034304	neurogenesis ; GO:0022008 | inferred from mutant phenotype	-	-
AAEL014607	cytochrome P450 [Source:VB External Description;Acc:AAEL014607]	no homolog
AAEL014637	inositol 1,4,5-trisphosphate receptor [Source:VB External Description;Acc:AAEL014637]	FBgn0010051	flight behavior ; GO:0007629 | inferred from mutant phenotype <newline> molting cycle, chitin-based cuticle ; GO:0007591 | inferred from genetic interaction with rut <newline> response to oxidative stress ; GO:0006979 | inferred from mutant phenotype <newline> mushroom body development ; GO:0016319 | inferred from mutant phenotype <newline> nuclear division ; GO:0000280 | inferred from direct ass…	endoplasmic reticulum membrane ; GO:0005789 | non-traceable author statement <newline> endoplasmic reticulum ; GO:0005783 | inferred from direct assay <newline> membrane ; GO:0016020 | inferred from electronic annotation with InterPro:IPR000493, InterPro:IPR000699, InterPro:IPR003608, InterPro:IPR005821, InterPro:IPR016093	inositol 1,4,5-trisphosphate-sensitive calcium-release channel activity ; GO:0005220 | inferred from direct assay <newline> calcium channel activity ; GO:0005262 | non-traceable author statement <newline> inositol 1,4,5-trisphosphate-sensitive calcium-release channel activity ; GO:0005220 | non-traceable author statement <newline> inositol 1,4,5-trisphosphate-sensitive calcium-release channel act…
AAEL014656	conserved hypothetical protein [Source:VB External Description;Acc:AAEL014656]	FBgn0030725	-	-	-
AAEL014706	LL5 beta protein, putative [Source:VB External Description;Acc:AAEL014706]	FBgn0029688	cellularization ; GO:0007349 | inferred from mutant phenotype <newline> establishment of Golgi localization ; GO:0051683 | inferred from mutant phenotype <newline> cellularization ; GO:0007349 | non-traceable author statement <newline> cellularization ; GO:0007349 | traceable author statement <newline> negative regulation of dendrite morphogenesis ; GO:0050774 | inferred from mutant phenotype	Golgi apparatus ; GO:0005794 | inferred from direct assay <newline> cell cortex ; GO:0005938 | inferred from direct assay <newline> Golgi apparatus ; GO:0005794 | non-traceable author statement <newline> Golgi apparatus ; GO:0005794 | traceable author statement <newline> microtubule associated complex ; GO:0005875 | inferred from direct assay	actin binding ; GO:0003779 | inferred from direct assay <newline> microtubule binding ; GO:0008017 | inferred from direct assay <newline> protein binding ; GO:0005515 | inferred from physical interaction with CLIP-190 <newline> spectrin binding ; GO:0030507 | traceable author statement
AAEL014720	hypothetical protein [Source:VB External Description;Acc:AAEL014720]	FBgn0086362	bristle morphogenesis ; GO:0008407 | inferred from mutant phenotype <newline> oocyte axis specification ; GO:0007309 | inferred from mutant phenotype <newline> oocyte microtubule cytoskeleton organization ; GO:0016325 | inferred from direct assay <newline> regulation of cytoskeleton organization ; GO:0051493 | inferred from physical interaction with ik2	-	minus-end-directed microtubule motor activity ; GO:0008569 | inferred from direct assay
AAEL014744	conserved hypothetical protein [Source:VB External Description;Acc:AAEL014744]	FBgn0034314	defense response ; GO:0006952 | inferred from sequence or structural similarity with EMBL:AJ010317; protein_id:CAA09084.1 <newline> signal transduction ; GO:0007165 | inferred from sequence or structural similarity with EMBL:AJ010317; protein_id:CAA09084.1 <newline> chromosome organization ; GO:0051276 | non-traceable author statement <newline> regulation of mitotic cell cycle ; GO:0007346 | infe…	-	zinc ion binding ; GO:0008270 | inferred from electronic annotation with InterPro:IPR001841
AAEL014750	pyruvate dehydrogenase [Source:VB External Description;Acc:AAEL014750]	FBgn0029958	protein dephosphorylation ; GO:0006470 | non-traceable author statement <newline> protein dephosphorylation ; GO:0006470 | inferred from sequence or structural similarity with UniProtKB:Q9P0J1 <newline> pyruvate metabolic process ; GO:0006090 | inferred from sequence or structural similarity with UniProtKB:Q9P0J1	mitochondrial matrix ; GO:0005759 | inferred from sequence or structural similarity with UniProtKB:Q9P0J1 <newline> nucleus ; GO:0005634 | inferred from direct assay <newline> cytoplasm ; GO:0005737 | inferred from direct assay <newline> mitochondrion ; GO:0005739 | inferred from direct assay	[pyruvate dehydrogenase (lipoamide)] phosphatase activity ; GO:0004741 | inferred from sequence or structural similarity with EMBL:L18966 <newline> protein serine/threonine phosphatase activity ; GO:0004722 | non-traceable author statement <newline> [pyruvate dehydrogenase (lipoamide)] phosphatase activity ; GO:0004741 | inferred from sequence or structural similarity with UniProtKB:Q9P0J1 <newli…
AAEL014752	conserved hypothetical protein [Source:VB External Description;Acc:AAEL014752]	FBgn0027553	negative regulation of transcription from RNA polymerase II promoter during mitosis ; GO:0007070 | inferred from sequence or structural similarity with UniProtKB:P92204	transcriptional repressor complex ; GO:0017053 | inferred from sequence or structural similarity with UniProtKB:P92204	mRNA binding ; GO:0003729 | inferred from sequence or structural similarity with UniProtKB:P92204
AAEL014768	glutamate synthase [Source:VB External Description;Acc:AAEL014768]	FBgn0036663	oxidation-reduction process ; GO:0055114 | inferred from electronic annotation with InterPro:IPR001327, InterPro:IPR002489, InterPro:IPR002932, InterPro:IPR006005, InterPro:IPR006982, InterPro:IPR012220, InterPro:IPR012285, InterPro:IPR023753 <newline> glutamate biosynthetic process ; GO:0006537 | inferred from electronic annotation with InterPro:IPR002932, InterPro:IPR006005, InterPro:IPR012220	-	glutamate synthase (NADPH) activity ; GO:0004355 | inferred from sequence or structural similarity with UniProtKB:Q03460 <newline> iron-sulfur cluster binding ; GO:0051536 | inferred from electronic annotation with InterPro:IPR009051, InterPro:IPR012285 <newline> glutamate synthase (NADH) activity ; GO:0016040 | inferred from electronic annotation with InterPro:IPR012220 <newline> flavin adenine …
AAEL014814	conserved hypothetical protein [Source:VB External Description;Acc:AAEL014814]	no homolog
AAEL014815	vacuolar protein sorting-associated protein (vps13) [Source:VB External Description;Acc:AAEL014815]	FBgn0039727	-	-	-
AAEL014816	hypothetical protein [Source:VB External Description;Acc:AAEL014816]	FBgn0038476	nucleus organization ; GO:0006997 | inferred from mutant phenotype <newline> morphogenesis of embryonic epithelium ; GO:0016331 | inferred from mutant phenotype <newline> cellularization ; GO:0007349 | inferred from mutant phenotype	nuclear inner membrane ; GO:0005637 | inferred from direct assay <newline> lipid particle ; GO:0005811 | inferred from direct assay	-
AAEL014819	conserved hypothetical protein [Source:VB External Description;Acc:AAEL014819]	FBgn0029838	biological_process ; GO:0008150 | no biological data available	cellular_component ; GO:0005575 | no biological data available	molecular_function ; GO:0003674 | no biological data available
AAEL014914	conserved hypothetical protein [Source:VB External Description;Acc:AAEL014914]	FBgn0037779	-	-	-
AAEL014966	hypothetical protein [Source:VB External Description;Acc:AAEL014966]	no homolog
AAEL014983	pupal cuticle protein, putative [Source:VB External Description;Acc:AAEL014983]	FBgn0028871	-	-	structural constituent of pupal chitin-based cuticle ; GO:0008011 | inferred from sequence or structural similarity <newline> structural constituent of pupal chitin-based cuticle ; GO:0008011 | inferred from sequence or structural similarity with EMBL:AF043442 <newline> structural constituent of chitin-based cuticle ; GO:0005214 | inferred from sequence or structural similarity with Pfam:PF00379 …
AAEL014998	hypothetical protein [Source:VB External Description;Acc:AAEL014998]	FBgn0035793	-	-	-
AAEL015143	glycine rich RNA binding protein, putative [Source:VB External Description;Acc:AAEL015143]	FBgn0005648	mRNA polyadenylation ; GO:0006378 | inferred from sequence or structural similarity <newline> mRNA polyadenylation ; GO:0006378 | inferred from direct assay <newline> mRNA polyadenylation ; GO:0006378 | inferred from mutant phenotype <newline> nuclear-transcribed mRNA poly(A) tail shortening ; GO:0000289 | inferred from mutant phenotype <newline> nuclear mRNA splicing, via spliceosome ; GO:000039…	nucleus ; GO:0005634 | inferred from sequence or structural similarity <newline> nucleus ; GO:0005634 | inferred from direct assay <newline> cytoplasm ; GO:0005737 | inferred from direct assay <newline> precatalytic spliceosome ; GO:0071011 | inferred from direct assay <newline> catalytic step 2 spliceosome ; GO:0071013 | inferred from direct assay	poly(A) RNA binding ; GO:0008143 | inferred from sequence or structural similarity with EMBL:U93050 <newline> poly(A) RNA binding ; GO:0008143 | inferred from sequence or structural similarity <newline> mRNA binding ; GO:0003729 | inferred from sequence or structural similarity <newline> poly(A) RNA binding ; GO:0008143 | inferred from sequence or structural similarity with SGD_LOCUS:SGN1; SGD:S0…
AAEL015163	cuticle protein, putative [Source:VB External Description;Acc:AAEL015163]	FBgn0035510	-	-	structural constituent of chitin-based larval cuticle ; GO:0008010 | inferred from sequence or structural similarity with UniProtKB:P80681 <newline> structural constituent of chitin-based cuticle ; GO:0005214 | inferred from sequence or structural similarity with Pfam:PF00379 inferred from sequence or structural similarity with InterPro:IPR000618
AAEL015177	citron ser/thr kinase [Source:VB External Description;Acc:AAEL015177]	FBgn0002466	cytokinesis ; GO:0000910 | inferred from mutant phenotype <newline> cytokinesis after mitosis ; GO:0000281 | inferred from mutant phenotype <newline> cytokinesis, completion of separation ; GO:0007109 | inferred from mutant phenotype <newline> protein phosphorylation ; GO:0006468 | non-traceable author statement <newline> cytokinesis, actomyosin contractile ring assembly ; GO:0000915 | inferred f…	actomyosin contractile ring ; GO:0005826 | inferred from direct assay	protein serine/threonine kinase activity ; GO:0004674 | non-traceable author statement <newline> diacylglycerol binding ; GO:0019992 | inferred from sequence or structural similarity with InterPro:IPR002219 <newline> protein serine/threonine kinase activity ; GO:0004674 | inferred from sequence or structural similarity with EMBL:AF086824 <newline> ATP binding ; GO:0005524 | inferred from electron…
AAEL015199	WD-repeat protein [Source:VB External Description;Acc:AAEL015199]	FBgn0013969
AAEL015222	adult cuticle protein, putative [Source:VB External Description;Acc:AAEL015222]	FBgn0036879	-	-	structural constituent of adult chitin-based cuticle ; GO:0008012 | inferred from sequence or structural similarity with UniProtKB:P26967 <newline> structural constituent of chitin-based cuticle ; GO:0005214 | inferred from sequence or structural similarity with Pfam:PF00379 inferred from sequence or structural similarity with InterPro:IPR000618
AAEL015223	adult cuticle protein, putative [Source:VB External Description;Acc:AAEL015223]	FBgn0036879	-	-	structural constituent of adult chitin-based cuticle ; GO:0008012 | inferred from sequence or structural similarity with UniProtKB:P26967 <newline> structural constituent of chitin-based cuticle ; GO:0005214 | inferred from sequence or structural similarity with Pfam:PF00379 inferred from sequence or structural similarity with InterPro:IPR000618
AAEL015330	hypothetical protein [Source:VB External Description;Acc:AAEL015330]	FBgn0044324	chromatin organization ; GO:0006325 | non-traceable author statement <newline> mitotic spindle organization ; GO:0007052 | inferred from mutant phenotype <newline> chromosome segregation ; GO:0007059 | inferred from mutant phenotype <newline> mitotic anaphase ; GO:0000090 | inferred from mutant phenotype <newline> metaphase plate congression ; GO:0051310 | inferred from mutant phenotype <newline>…	polytene chromosome interband ; GO:0005705 | non-traceable author statement <newline> polytene chromosome interband ; GO:0005705 | inferred from direct assay <newline> spindle ; GO:0005819 | inferred from direct assay <newline> centrosome ; GO:0005813 | inferred from direct assay <newline> polytene chromosome ; GO:0005700 | inferred from direct assay <newline> nucleus ; GO:0005634 | inferred from…	-
AAEL015337	neutral alpha-glucosidase ab precursor (glucosidase ii alpha subunit) (alpha glucosidase 2) [Source:VB External Description;Acc:AAEL015337]	FBgn0027588	carbohydrate metabolic process ; GO:0005975 | inferred from electronic annotation with InterPro:IPR000322, InterPro:IPR011013	alpha-glucosidase II complex ; GO:0017177 | inferred from sequence or structural similarity with EMBL:U92793 <newline> microtubule associated complex ; GO:0005875 | inferred from direct assay	alpha-glucosidase activity ; GO:0004558 | inferred from sequence or structural similarity with EMBL:U92793 <newline> carbohydrate binding ; GO:0030246 | inferred from electronic annotation with InterPro:IPR011013
AAEL015543	conserved hypothetical protein [Source:VB External Description;Acc:AAEL015543]	no homolog
AAEL015564	conserved hypothetical protein [Source:VB External Description;Acc:AAEL015564]	FBgn0034970	regulation of rhodopsin gene expression ; GO:0007468 | non-traceable author statement <newline> cell proliferation ; GO:0008283 | inferred from mutant phenotype <newline> negative regulation of apoptosis ; GO:0043066 | inferred from mutant phenotype <newline> morphogenesis of an epithelial sheet ; GO:0002011 | inferred from mutant phenotype <newline> regulation of growth ; GO:0040008 | inferred f…	-	transcription coactivator activity ; GO:0003713 | non-traceable author statement <newline> ubiquitin-protein ligase activity ; GO:0004842 | inferred from sequence or structural similarity with SGD_LOCUS:RSP5; SGD:S0000927
AAEL016980		no_info
AAEL016998		no_info
AAEL017035		no_info
AAEL017044		no_info
AAEL017054		no_info
AAEL017146		no_info
AAEL017153		no_info
AAEL017195		no_info
AAEL017233		no_info
AAEL017244		no_info
AAEL017286		no_info
AAEL017317		no_info
AAEL017334		no_info
AAEL017338		no_info
AAEL017357		no_info
AAEL017366		no_info
AAEL017381		no_info
AAEL017411		no_info
AAEL017447		no_info
AAEL017480		no_info
AAEL017498	caspase [Source:VB External Description;Acc:AAEL017498]	no_info
AAEL017516		no_info
AAEL017531		no_info
AAEL017568		no_info
